# Supplementary material for: Women’s experiences with using patient-reported outcome and experience measures in routine perinatal care in the Netherlands: a mixed-methods study
Source: PubMed Central journal article supplement — BMJ Open. 2023 Mar 10;13(3):e064452. doi: 10.1136/bmjopen-2022-064452 (PMC10008176; doi:10.1136/bmjopen-2022-064452), 2023-03-10
Supplement: bmjopen-2022-064452.draft_revisions.pdf [file bmjopen-2022-064452.draft_revisions.pdf]

# BMJ Open

BMJ Open is committed to open peer review. As part of this commitment we make the peer review history of every article we publish publicly available.

When an article is published we post the peer reviewers' comments and the authors' responses online. We also post the versions of the paper that were used during peer review. These are the versions that the peer review comments apply to.

The versions of the paper that follow are the versions that were submitted during the peer review process. They are not the versions of record or the final published versions. They should not be cited or distributed as the published version of this manuscript.

BMJ Open is an open access journal and the full, final, typeset and author-corrected version of record of the manuscript is available on our site with no access controls, subscription charges or pay-per-view fees (<http://bmjopen.bmj.com>).

If you have any questions on BMJ Open's open peer review process please email [info.bmjopen@bmj.com](mailto:info.bmjopen@bmj.com)

# BMJ Open

## Patients' experiences with using PROM and PREM in routine perinatal care in the Netherlands: a mixed methods study

|                               |                                                                                                                                                                                                                                                                                                                                                                                                                                                                                                                                                                   |
|-------------------------------|-------------------------------------------------------------------------------------------------------------------------------------------------------------------------------------------------------------------------------------------------------------------------------------------------------------------------------------------------------------------------------------------------------------------------------------------------------------------------------------------------------------------------------------------------------------------|
| Journal:                      | <i>BMJ Open</i>                                                                                                                                                                                                                                                                                                                                                                                                                                                                                                                                                   |
| Manuscript ID                 | bmjopen-2022-064452                                                                                                                                                                                                                                                                                                                                                                                                                                                                                                                                               |
| Article Type:                 | Original research                                                                                                                                                                                                                                                                                                                                                                                                                                                                                                                                                 |
| Date Submitted by the Author: | 02-May-2022                                                                                                                                                                                                                                                                                                                                                                                                                                                                                                                                                       |
| Complete List of Authors:     | Laureij, Lyzette; Erasmus MC, Obstetrics and Gynaecology<br>Depla, Anne; UMC Utrecht<br>Kariman, Shariva; UMC Utrecht, Department of Obstetrics and Gynaecology<br>Lamain-de Ruiten, Marije; Erasmus MC, Department of Obstetrics and Gynaecology; UMC Utrecht, Department of Obstetrics and Gynaecology<br>Ernst -Smelt, Hiske; Erasmus MC, Department of Obstetrics and Gynaecology<br>Hazelzet, Jan; Erasmus MC, Department of Public Health<br>Franx, Arie; Erasmus MC, Obstetrics and Gynaecology<br>Bekker, Mireille; UMC Utrecht<br>Team, Buzz; Erasmus MC |
| Keywords:                     | OBSTETRICS, QUALITATIVE RESEARCH, PRIMARY CARE, HEALTH SERVICES ADMINISTRATION & MANAGEMENT                                                                                                                                                                                                                                                                                                                                                                                                                                                                       |
|                               |                                                                                                                                                                                                                                                                                                                                                                                                                                                                                                                                                                   |

SCHOLARONE™  
Manuscripts

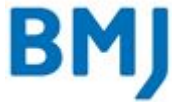

I, the Submitting Author has the right to grant and does grant on behalf of all authors of the Work (as defined in the below author licence), an exclusive licence and/or a non-exclusive licence for contributions from authors who are: i) UK Crown employees; ii) where BMJ has agreed a CC-BY licence shall apply, and/or iii) in accordance with the terms applicable for US Federal Government officers or employees acting as part of their official duties; on a worldwide, perpetual, irrevocable, royalty-free basis to BMJ Publishing Group Ltd ("BMJ") its licensees and where the relevant Journal is co-owned by BMJ to the co-owners of the Journal, to publish the Work in this journal and any other BMJ products and to exploit all rights, as set out in our [licence](#).

The Submitting Author accepts and understands that any supply made under these terms is made by BMJ to the Submitting Author unless you are acting as an employee on behalf of your employer or a postgraduate student of an affiliated institution which is paying any applicable article publishing charge ("APC") for Open Access articles. Where the Submitting Author wishes to make the Work available on an Open Access basis (and intends to pay the relevant APC), the terms of reuse of such Open Access shall be governed by a Creative Commons licence – details of these licences and which [Creative Commons](#) licence will apply to this Work are set out in our licence referred to above.

Other than as permitted in any relevant BMJ Author's Self Archiving Policies, I confirm this Work has not been accepted for publication elsewhere, is not being considered for publication elsewhere and does not duplicate material already published. I confirm all authors consent to publication of this Work and authorise the granting of this licence.

1  
2  
3 **Patients' experiences with using PROM and PREM in routine perinatal care in the Netherlands: a**  
4 **mixed methods study**  
5

6 Lyzette T. Laureij<sup>1</sup>, Anne L. Depla<sup>2</sup>, Shariva S. Kariman<sup>2</sup>, Marije Lamain-de Ruiten<sup>1,2</sup>, Hiske E. Ernst-  
7 Smelt<sup>1</sup>, Jan Hazelzet<sup>3</sup>, Arie Franx<sup>1</sup>, Mireille N. Bekker<sup>2</sup> - on behalf of the BUZZ project team\*  
8  
9

10 Corresponding author:

11 M.N. Bekker

12 KE.04.123.1, Lundlaan 6, 3584 EA, Utrecht, The Netherlands

13 Tel: +31887553981

14 E-mail: <m.n.bekker-3@umcutrecht.nl>  
15  
16

17 Affiliations:

18  
19 <sup>1</sup> Department of Obstetrics and Gynaecology, Division Obstetrics and Foetal Medicine,  
20 Erasmus MC, Rotterdam, the Netherlands  
21

22 <sup>2</sup> Department of Obstetrics and Gynaecology, Wilhemina Children's Hospital, University  
23 Medical Centre Utrecht, the Netherlands  
24

25 <sup>3</sup> Department of Public Health, Erasmus MC, Rotterdam, the Netherlands  
26

27 \* Next to the authors, the BUZZ team consisted of Jolanda H. Vermolen<sup>4</sup>, Simone A. Vankan-  
28 Buitelaar<sup>2</sup>, Monique Klerkx<sup>5</sup>, Pieter-Kees de Groot<sup>6</sup>, Nikkie Koper<sup>7</sup>, Hilmar H. Bijma<sup>1</sup>, Bas van Rijn<sup>1</sup>,  
29 Elise Neppelenbroek<sup>8</sup>, Sebastiaan W.A. Nij Bijvank<sup>9</sup>, Marieke Veenhof<sup>10</sup>, Margo Lutke Holzik<sup>10</sup>, Jelle  
30 Baalman<sup>11</sup>, Josien Vrieling-Braakman<sup>12</sup>  
31  
32

33 <sup>4</sup> Maternity care organization De Waarden, Schoonhoven, the Netherlands

34 <sup>5</sup> Integrated obstetric care organization Annature Geboortezorg, Breda, the Netherlands

35 <sup>6</sup> Department of Obstetrics, Spaarne Gasthuis, Haarlem, the Netherlands

36 <sup>7</sup> Midwifery practice Duo, Zwanenburg, the Netherlands

37 <sup>8</sup> Midwifery practice Verloskundigen Bakerraad, Zwolle, the Netherlands

38 <sup>9</sup> Department of Obstetrics, Isala Clinics, Zwolle, the Netherlands

39 <sup>10</sup> Department of Obstetrics, Leiden University Medical Center, Leiden, the Netherlands

40 <sup>11</sup> Department of Obstetrics, Medisch Spectrum Twente, Enschede, the Netherlands

41 <sup>12</sup> Midwifery practice Verwacht!, Vriezenveen, the Netherlands  
42  
43  
44  
45

46 Shortened running title: Patient experiences using PROMs and PREMS in perinatal care  
47  
48  
49

50 Wordcount: 4023

51 Number of tables (2) and figures (1)

52 Appendices: 3  
53  
54  
55  
56  
57  
58  
59  
60



## ABSTRACT

### Objective

To gain insight into the experiences of patients with completing and discussing patient reported outcome measures (PROM) and patient reported experience measures (PREM), and tailoring their care based on their outcomes.

### Design, setting, participants and method

A mixed-methods study was performed in seven obstetric care networks in the Netherlands that implemented a set of patient-centred outcome measures for pregnancy and childbirth (PCB set), published by the International Consortium for Health Outcomes Measurement. All women receiving the PROM and PREM questionnaires as part of their routine perinatal care, received an invitation for this study, including an anonymous survey (n=460) and a phone interview (n=16) regarding their experiences.

### Results

More than half of the survey participants (n=255) felt the need to discuss the outcomes of PROM and PREM with their care professionals. The time spent on completing the questionnaires and the comprehensiveness of the questions was scored 'good' by most of the survey participants. From the interviews and free text survey answers, four main themes were identified: content of the PROM and PREM questionnaires, application of the outcomes of PROM and PREM in perinatal care, discussing PREM, and data capture tool. Important facilitators included awareness of health status in pregnancy and postpartum, receiving personalised care based on their outcomes and the relevance of discussing PREM six months postpartum. Barriers were found in insufficient information about the goal of PROM and PREM for individual care, technical problems in data capture tools and discrepancy between the questionnaire topics and the care pathway.

## Conclusions

This study showed that patients found the PCB set an acceptable and useful instrument for symptom detection and personalised care up until six months postpartum. This patient evaluation of the PCB set has several implications for practice regarding the questionnaire content, role of care professionals and congruity with care pathways.

## Key words:

Value-based healthcare

Obstetrics

Perinatal care

Patient-reported outcome measures

Shared decision making

Qualitative research

Quantitative research

Mixed methods

## Article Summary

- This study had a prospective design and was incorporated in an implementation project as part of routine perinatal care.
- As a result of the embedding in an implementation project, we were able to combine the results of a large sample size of survey participants with semi-structured interviews to explore survey answers in-depth, which increased the generalizability of our results.
- These are the first experiences from patient perspective regarding completing and discussing PROMs and PREMs during routine perinatal care.

- A limitation of this study was the unequal representation of time points for PROM and PREM collection in our interview sample, due to the nature of the implementation project.

For peer review only

## INTRODUCTION

Healthcare systems are increasingly focusing on creating value for patients.[1] Therefore, patient-reported outcome measures and experience measures (PROM and PREM) are progressively used to guide individual patient care, in quality improvement, and for research purposes. In routine care, patients complete PROM and PREM via standardised disease specific questionnaires, between visits to care professionals. Care professionals receive notifications about alarm symptoms, such as pain or functional complaints and can review longitudinal PROM and PREM reports over time. This way, symptoms and impairments are more likely to be detected, creating an opportunity to personalise care based on individual needs.[2] In chronic care settings, this approach has been shown to improve shared decision making, patient-clinician relationship and health outcomes.[3, 4]

In perinatal care, important outcomes expressing quality of life and social participation can be detected from PROM and PREM, such as maternal depression, incontinence, and birth experience. PROM and PREM may differ greatly and may be independent of provider-reported outcomes, describing far-reaching effects on patients' lives.[5, 6] Additionally, PROM and PREM may highlight important outcomes from the patient perspective that remained hidden when collecting provider-reported outcomes only. Therefore, implementation of standardised PROM and PREM, including the adaptation of individual care pathways based on individual outcomes, is essential to further personalise and improve quality of perinatal care from the patient perspective. The International Consortium for Health Outcomes Measurement (ICHOM) provided a set of patient-centred outcome measures for pregnancy and childbirth (PCB Set) for perinatal care containing both provider-reported and patient-reported outcomes.[7] Prior research in the Netherlands found this set to be acceptable and feasible for implementation by all important stakeholders including patients.[8, 9]

However, little is known regarding the patients' experiences with completing the PROM and PREM and receiving care based on their individual outcomes as part of routine perinatal care.

1  
2  
3 In the Netherlands, a nationwide implementation project was initiated to facilitate shared decision  
4 making by implementing the PROM and PREM of the PCB Set in regular perinatal care. To achieve  
5 successful implementation, identifying unanticipated influences, facilitators and barriers among the  
6 users during the early implementation process of PROM and PREM is crucial.[10] Our pre-  
7 implementation research identified patients as important users next to perinatal care professionals.  
8 [8, 9] Insights into first patients' experiences with receiving personalised care based on their  
9 individual PROM and PREM during pregnancy, childbirth and the postpartum period will enhance  
10 and improve further implementation of PROM and PREM as part of routine perinatal care.  
11 Therefore, alongside the nationwide implementation project, we conducted a mixed methods study  
12 to gain insight into the experiences of patients with completing and discussing PROM and PREM, and  
13 tailoring their care based on their outcomes in a routine perinatal care setting.  
14  
15  
16  
17  
18  
19  
20  
21  
22  
23  
24  
25  
26  
27  
28  
29  
30  
31  
32  
33  
34  
35  
36  
37  
38  
39  
40  
41  
42  
43  
44  
45  
46  
47  
48  
49  
50  
51  
52  
53  
54  
55  
56  
57  
58  
59  
60

## METHODS

### Design

Mixed-method prospective cohort study to gain insight in patients' experiences with using the PROM and PREM of the ICHOM PCB set for perinatal care in clinical practice among patients.

### Setting

This study was conducted in seven obstetric care networks (OCNs) participating in a nationwide implementation project of the ICHOM PCB Set in the Netherlands. Data collection was performed from March 2020 up until September 2021. The PROM and PREM were sent to the participants at five time points during their pregnancy or postpartum period. In these periods, different care professionals may have been responsible for the participants' health (see Figure 1). Care professionals were trained in interpreting results of PROM and PREM, and in discussing them. They discussed the results of the PROM and PREM during the visit directly after the five time points, including the time point at six months postpartum. Implementation plans differed among the different OCNs; OCNs collected PROM and PREM during at least one time point, this was not necessarily time point 1.

### Patient and Public Involvement statement

Simultaneously with the implementation of the PCB set, this study was conducted to gain insight into patients' experiences with completing and discussing PROM and PREM. In this study, we sent out a survey and conducted interviews with patients. The study was designed in close collaboration with care professionals. The questionnaires used to collect the PROMs and PREMs were tested for comprehensiveness among four women with low health literacy skills supported by Pharos, a national centre of expertise in decreasing health inequities.[11] Small language adaptations were made based on this test.

1  
2  
3 **Figure 1** Time points for data collection (PROM and PREM) and involvement of different care  
4 professionals, according to current practice in the Netherlands.

5 *The blue dots indicate the five time points for data collection during pregnancy and postpartum.*  
6 *Above the timeline, the involved care professionals are shown. In this project, the outcomes of the*  
7 *PROMs and PREMs were discussed with an obstetric care professional during all time points.[7]*  
8  
9

## 10 11 12 Participants

13  
14 As our study was conducted within a large implementation project of the PCB set, all patients who  
15 received PROM and PREM questionnaires as part of their routine perinatal care in one of the  
16 participating OCNs were eligible for this study. Patients received an information leaflet regarding the  
17 purpose of the PROM and PREM before filling out their first questionnaire. At the end of each  
18 questionnaire, patients were invited to participate in this study by filling out a short evaluation  
19 survey and by a telephone interview regarding their experiences with completing and discussing the  
20 PROM and PREM.  
21  
22

23  
24  
25 Inclusion criteria were:

- 26 - patients completed at least one questionnaire of the PCB set;
  - 27 - patients were 16 years or older during the first data collection time point;
  - 28 - patients gave their informed consent to use their answers for research.
- 29  
30  
31

## 32 33 34 35 36 37 38 39 40 41 Data collection

42  
43 The researchers composed a short evaluation survey (Supplementary Table 1). This anonymous  
44 survey was offered to participants via a digital link after completing their PROM and PREM. One OCN  
45 collected this evaluation survey on paper. Answers to this survey were not visible to care  
46 professionals. At the end of this evaluation survey, participants were asked to provide their  
47 telephone number for an in-depth evaluation interview by phone. First, all participants who  
48 provided their telephone number were approached for a semi-structured interview by one of the  
49 researchers (see for topic list Table 1). Further on, purposive sampling was performed, e.g., selecting  
50 participants that had filled out PROM and PREM at time points 3, 4, and 5, and women who gave  
51  
52  
53  
54  
55  
56  
57  
58  
59  
60

1  
2  
3 specific answers in the evaluation survey. Additionally, care professionals were asked to actively  
4  
5 recruit women with decreased health literacy skills for an interview by the researchers. Data  
6  
7 collection was ended as soon as thematic saturation was accomplished (see Data analysis). All  
8  
9 interviews were audio-recorded and transcribed verbatim.  
10  
11  
12  
13  
14  
15  
16  
17  
18  
19  
20  
21  
22  
23  
24  
25  
26  
27  
28  
29  
30  
31  
32  
33  
34  
35  
36  
37  
38  
39  
40  
41  
42  
43  
44  
45  
46  
47  
48  
49  
50  
51  
52  
53  
54  
55  
56  
57  
58  
59  
60

For peer review only



**Table 1 Topic list used for the interviews**

| Topics                                               | Sub topics                                                                                                                                                                                                                                                                                                                                                                                                  |
|------------------------------------------------------|-------------------------------------------------------------------------------------------------------------------------------------------------------------------------------------------------------------------------------------------------------------------------------------------------------------------------------------------------------------------------------------------------------------|
| Course pregnancy/childbirth                          | General Health / Experiences pregnancy                                                                                                                                                                                                                                                                                                                                                                      |
| Time spent on completing PROM and PREM - experiences | Experiences completing PROM and PREM<br>Experience on time spend<br>Motivation for completion of PROM and PREM<br>Reasons for (not) completing PROM and PREM in the future<br>Time point 1 & 2: thoughts regarding completing PROM and PREM multiple times during pregnancy and after childbirth<br>Time point 3-5: experiences with completing PROM and PREM after childbirth up until 6 months postpartum |
| Comprehensiveness PROM and PREM                      | Understanding PROM and PREM: language used, reason why PROM and PREM were asked, information provision<br>Social desirability<br>PREM regarding experiences with care providers: completing and discussing                                                                                                                                                                                                  |
| Discussing PROM and PREM with care professionals     | Experiences regarding discussing PROM and PREM<br>Adverse outcomes of PROM and PREM<br>Taboo topics<br>Bond with care professional<br>Unexpected outcomes<br>Resistance regarding discussing PROM and PREM<br>Advantages and gains of discussing PROM and PREM                                                                                                                                              |
| Improvements and suggestions                         | Results of evaluation survey<br>Previously completed PROM and PREM<br>Important topics                                                                                                                                                                                                                                                                                                                      |
| Preferred care provider                              | Time point<br>Outcomes that are discussed                                                                                                                                                                                                                                                                                                                                                                   |
| Shared decision making                               | Care pathway – participant’s influence<br>Discussing wishes and fears regarding pregnancy and childbirth<br>Patient – care professional relationship                                                                                                                                                                                                                                                        |

*PROM: patient reported outcome measures. PREM: patient reported experience measures*

### Data analysis

The quantitative data from the evaluation survey was analysed using descriptive statistics with SPSS version 25 (IBM Corp., Armonk, N.Y., USA). Free text answers were analysed with thematic analysis supported by Microsoft Excel (version 16). The transcriptions from the interviews were checked for accuracy with the original audiotapes by LL. The software program Atlas.ti 9 was used to support thematic inductive content analysis.[12] LL and SK independently coded the transcripts to create a set of preliminary codes and compared the codes to reach consensus. To detect emerging themes, matching codes were merged, and links between codes were explored. An overview of themes and subthemes for patients' experiences with completing and discussing PROM and PREM was constructed. This overview was combined and compared with the free text answer analysis of the open-ended questions from the survey into an integrated overview. The integrated overview was discussed with AD, ML and MB and subthemes were identified as facilitators and barriers. Reporting followed the Standards for Reporting Qualitative Research (SRQR).[13]

## RESULTS

### Survey

460 Participants filled out the patient evaluation survey from a total of 1318 women who completed at least one PROM and PREM questionnaire. Descriptive statistics of the survey are shown in Supplementary Table 2 and Supplementary Figure 1a-d. Regarding the time spent on completing the questionnaires, 87% of participants indicated this as 'good'. The comprehensiveness of the questions was indicated as 'good' by most participants (78%). The need to discuss the outcomes of the questionnaires with the care professional differed: of the participants 39% answered 'not really', and 35% 'a little', and 20% 'yes'. Of the participants that wanted to discuss the outcomes, the majority preferred their obstetric care professional for this. The answers from the open-ended questions are to be discussed below.

### Interviews

26 participants provided their telephone number for the interview, none of these participants had completed PROM and PREM during time point 3 (maternity week). 16 interviews were conducted. We interviewed two participants that completed PROM and PREM during time point 1 and 4, nine during time point 2, and three during time point 5. Participants' average age was 34 years [29-39 years] and the majority was higher educated (14 of 16), i.e., completed an education at a university or university of applied sciences. Four participants received perinatal care for the first time; they were pregnant of or had given birth to their first child. Six participants received perinatal care by a community midwife, five by a gynaecologist in the hospital, and five had shared care by both community midwives and gynaecologists.

## Themes

From the open-ended questions and interviews the identified facilitators and barriers were allocated to four overarching themes (see Table 2): 1. Content of the PROM and PREM, 2. Application of the outcomes of PROM and PREM in perinatal care, 3. Discussing PREM, and 4. Data capture tool. These themes including facilitators and barriers are described below in detail, with illustrative quotes.

### *1. Content of PROM and PREM questionnaires*

Most participants found the language of the PROM and PREM clear and understood the questions. Participants felt that the PROM and PREM covered most important topics and were of a good length. Most participants emphasised the importance of PROM and PREM addressing taboo topics, such as incontinence, depression, and pain with intercourse. In the interviews, participants shared that completing PROM and PREM on these topics created awareness about their current health status and potential problems during pregnancy, childbirth and first months postpartum (see Quote 1).

#### *Quote 1 Awareness of taboo topics:*

*[Complete PROM/PREM to prepare for their next visit] "I assume [advantages] for both parties: for yourself because you think about everything, also things you wouldn't consider at first. And I expect it [capturing PROM and PREM] would be helpful for a care professional as well, because he can ask further than just the topics a patient brings up at that moment." (T4)*

However, the language of some questions was too difficult, especially for lower educated women, and several PROMs were not specific in timing or location of physical complaints. This led to different interpretations of the questions. Regarding the content of the PREM, participants

1  
2  
3 experienced discrepancy between the timing of the questions and the care received. For example, at  
4  
5 time point 2, options for pain management during childbirth had often not been discussed yet, thus  
6  
7 participants answered negative to the PREM addressing this. Another issue mentioned by the  
8  
9 interview participants regarding in relation to PREM, was that they often received care from multiple  
10  
11 care professionals. They stated that they had to average their experiences when completing the  
12  
13 PREM. Several participants reported that they missed the answer option “I don’t know (yet)” or “not  
14  
15 applicable” in some questions, and the possibility to explain their answers. Also, participants missed  
16  
17 the possibility in the questionnaires to point out important outcomes. This topic was expanded  
18  
19 during the interviews; participants wanted to be able to indicate outcomes important to discuss  
20  
21 during the following visit (see Quote 2).  
22  
23  
24  
25  
26  
27  
28

29 *Quote 2 No opportunity to explain answers or pointing out important topics*

30 *[Opportunity for explanation during completion of PROM and PREM] “You should*  
31 *have a choice: whether you want to discuss it [your answers] or not, whether you*  
32 *want to be referred or not. [...] You could put it [an open text field] at the end of*  
33 *the questionnaire: ‘ If you want consultation on this, if you have a top 3 or top 5 or*  
34 *something of the things that were just asked, what are the topics you would like*  
35 *to discuss with your midwife?’” (T2)*

36  
37  
38  
39  
40  
41  
42  
43  
44  
45  
46  
47 Although most important topics were covered in the PROM and PREM, some participants stated that  
48  
49 there was too little attention for prevalent physical problems. They missed questions concerning  
50  
51 pelvic pain and haemorrhoids, especially at time point 2. Lastly, the timing of one specific topic was  
52  
53 debated by several participants: the PROM breastfeeding. At time point 2, this topic was  
54  
55 experienced as too early since most women did not know whether they intended to breastfeed and  
56  
57  
58  
59  
60

1  
2  
3 could not properly answer the full questionnaire about self-efficacy. At time point 4, participants  
4  
5 indicated it felt too late to discuss problems with breastfeeding.  
6  
7  
8  
9

## 10 11 2. *Application of the outcomes of PROM and PREM in perinatal care*

12  
13  
14 Most participants indicated that filling out PROM and PREM helped them in preparing their next visit  
15  
16 to their obstetric care professional. They stated that thinking about the topics addressed by the  
17  
18 questionnaires made them know better what to expect from and to discuss in the following visit.  
19  
20 Interview participants also pointed out that the use of PROM and PREM led to discussion of topics  
21  
22 that previously were no part of the conversation with their care professional. Some participants  
23  
24 indicated that they were unaware of some topics being pregnancy related, such as psychological  
25  
26 problems. Furthermore, some participants from the interviews said that they felt their care was  
27  
28 personalised based on their individual outcomes, for example extra attention, information, or a  
29  
30 referral for specialised care (see Quote 3 and Quote 4).  
31  
32  
33  
34  
35  
36  
37

### 38 *Quote 3 Care is personalised based on individual outcomes*

39  
40 *“Then she [the care professional that discussed her outcomes with her] said she could*  
41  
42 *refer me to a clinic for pelvic problems if I wanted to. [...] I thought that was very good.*  
43  
44 *They directly did a follow-up and offered me sort of an option like ‘you could this’.” (T5)*  
45  
46  
47  
48

### 49 *Quote 4 Care is personalised based on individual outcomes*

50  
51 *[her PROM answers indicated depressive symptoms] “Well... personally I think I, and*  
52  
53 *they too [care professionals], gave some extra attention to my mental health.” (T2)*  
54  
55  
56  
57  
58  
59  
60

1  
2  
3 At time point 5, one participant from the interviews felt relieved that her care professional paid  
4 attention to her incontinence and psychological problems. She felt that otherwise she would not  
5  
6 have had any care professional to discuss these issues with.  
7  
8

9  
10 Despite the availability of an information leaflet and their care professionals' explanation, many  
11  
12 participants had misunderstood the aim of the project. They thought it was a research project and  
13  
14 that their answers were used for research purposes only. This indicates that the information about  
15  
16 the purpose of PROM and PREM for individual care was insufficient, which posed a major barrier to  
17  
18 complete questionnaires multiple times (see Quote 5).  
19  
20  
21  
22  
23  
24

25 *Quote 5 Insufficient information on the aim personalised care based on PROM and*  
26  
27 *PREM*

28  
29 *"It was not clear to me why it [PROM and PREM] was asked. And I also can't*  
30  
31 *remember that it [PROM and PREM questionnaires] included an introduction text*  
32  
33 *or something like that... maybe that was included you know... but for me it was not*  
34  
35 *clear what they wanted to do with that information [her answers]" (T2)*  
36  
37  
38  
39

40 Furthermore, some participants stated it was uncertain when the outcomes of their questionnaire  
41  
42 would be discussed with them; not all participants had their outcomes discussed during the first visit  
43  
44 after completing the PROM and PREM. One participant said that her outcomes were never discussed  
45  
46 with her. Several participants mentioned that completing PROM and PREM gave them the feeling of  
47  
48 'impersonalised care', as if care professionals tried to avoid the conversation about these topics.  
49  
50 Other interview participants felt unsure about how the outcomes of the PROM and PREM would  
51  
52 impact the quality of care of their individual care pathway. For example, when filling out negative  
53  
54 experiences regarding one specific care professional, they preferred to receive care from another  
55  
56 care professional because of their negative experience. Some participants, from both the survey and  
57  
58  
59  
60

1  
2  
3 the interviews, felt that discontinuity in care professionals posed a barrier to discuss the outcomes.  
4  
5 They did not feel at ease discussing outcomes with a care professional they had never met before  
6  
7 (see Quote 6). Interview participants also did not always know which care professional was  
8  
9 responsible for their outcomes.  
10  
11  
12  
13  
14

15 *Quote 6 Discontinuity of care professional*

16  
17 *“Nothing really popped up [from her answers to the questionnaires], but if that would have*  
18  
19 *been the case than I think it is harder to discuss some topics with a person [care*  
20  
21 *professional] that I have never met. Especially because some of these topics are sensitive*  
22  
23 *and vulnerable.” (T1)*  
24  
25  
26  
27  
28

29 *3. Discussing PREM*

30  
31  
32 Participants stated that the PREM were an important facilitator for them to complete the PROM and  
33  
34 PREM. They stressed that they found it very important that care professionals had insight in  
35  
36 patients’ experiences with the provided care. Additionally, participants from the interviews thought  
37  
38 that the insight in individual PREM may lead to improved quality of individual care. Especially  
39  
40 participants that completed PREM at time point 5 stated that the PREM were important to complete  
41  
42 and to discuss, because it helped them to process the pregnancy and postpartum period (see Quote  
43  
44 7).  
45  
46  
47  
48  
49  
50

51 *Quote 7 Discussing PREM at time point 5 important for reflection on pregnancy and*  
52  
53 *childbirth*

54  
55 *[After completing the T5 questionnaire] “The fact that she [care professional] called back,*  
56  
57 *that she called back actually concerned, and just ... just was talking with me and*  
58  
59  
60



1  
2  
3 *explained things. That has really, also in my head, enormously helped to sort things out.*  
4  
5 *[...] Yes, I really look back on that [childbirth and postpartum period] better now.” (T5)*  
6  
7  
8  
9

10 Additionally, analysis of aggregate PREM results may indicate improvement topics, according to the  
11 interview participants. At the same time, a barrier was identified in overlap; some participants  
12 received PREM and other care evaluation questionnaires from their community midwives  
13 postpartum, and it caused confusion for them whether these outcomes were also sent to their  
14 midwives. Ambiguous opinions were found regarding discussing PREM individually. Some  
15 participants, who were satisfied with the care they received, indicated they would have preferred  
16 addressing negative experiences directly with their care professional, instead of via PREM (see  
17 Quote 8). In contrast to participants that had had negative experiences: they explained it felt easier  
18 to indicate this via PREM instead of discussing it face to face with their care professional.  
19  
20  
21  
22  
23  
24  
25  
26  
27  
28  
29  
30  
31  
32  
33

34 *Quote 8 Negative PREM preferably face to face*

35 *[addressing care experiences with care professional] “I believe it is fairer when*  
36 *they [care professionals] hear it from me personally, but I can imagine that some*  
37 *people don’t feel comfortable with that and prefer to leave their feedback*  
38 *anonymously and that eventually it will reach the care professional anyway.” (T2)*  
39  
40  
41  
42  
43  
44  
45  
46  
47

48 Additionally, some participants stated to feel dependent of their care professional during their care  
49 pathway, which posed a barrier to report negative experiences in the PREM.  
50  
51  
52  
53  
54  
55

#### 56 4. Data capture tool

57  
58  
59  
60

1  
2  
3 Participants indicated that they preferred to complete PROM and PREM digitally. Completing the  
4  
5 PROM and PREM on mobile phones or tablets was preferred by most women. However, participants  
6  
7 pointed out technical issues as a major barrier; PROM and PREM questions and answers that were  
8  
9 not entirely visible on a mobile phone led to incomplete or incorrect outcomes according to some  
10  
11 women (see Quote 9).  
12  
13  
14  
15  
16

17 *Quote 9 Technical problems and bugs*

18  
19 *[Completing PROM and PREM] "On my smartphone I can't see all the questions.*

20  
21 *On the iPad, some answer options disappear, so I must check three times whether*  
22  
23 *my answers are completed correctly. For example, satisfaction is measured on a*  
24  
25 *scale from 1 to 4. But when I go to the next page and back, it appears to be a scale*  
26  
27 *from 1 to 10."* (T2)  
28  
29  
30  
31  
32

33 Also, some participants received PROM and PREM belonging to a different time point or received the  
34  
35 same PROM and PREM multiple times. Furthermore, several interviewed participants stated that it  
36  
37 was unclear which organization sent the invitation to complete the questionnaires and which care  
38  
39 professionals had access to their answers. This made them have doubts regarding privacy (see Quote  
40  
41 10).  
42  
43  
44  
45  
46  
47

48 *Quote 10 Privacy issues*

49  
50 *[Completing questions regarding incontinence, mental health, physical complaints]: "And*  
51  
52 *yes, those are questions of a kind that you would only complete honestly if you are*  
53  
54 *completely sure that you can trust that they will end up at the right person."* (T2)  
55  
56  
57  
58  
59  
60

1 **Table 1 Overarching themes and identified facilitators and barriers**

| Themes                                                   | Facilitators                                                                                                                                                                                                                                                                                                                                                                                | Barriers                                                                                                                                                                                                                                                                                                                                                                                                                                                                                |
|----------------------------------------------------------|---------------------------------------------------------------------------------------------------------------------------------------------------------------------------------------------------------------------------------------------------------------------------------------------------------------------------------------------------------------------------------------------|-----------------------------------------------------------------------------------------------------------------------------------------------------------------------------------------------------------------------------------------------------------------------------------------------------------------------------------------------------------------------------------------------------------------------------------------------------------------------------------------|
| <b>1. Content of PROM and PREM questionnaires</b>        | <ul style="list-style-type: none"> <li>Clear language</li> <li>PROM and PREM covering all important topics</li> <li>Good length of questionnaires</li> <li>Awareness of taboo topics</li> </ul>                                                                                                                                                                                             | <ul style="list-style-type: none"> <li>Language of some questions too difficult</li> <li>Some PROM questions not specific in time or location</li> <li>Discrepancy questions with care path and situation</li> <li>Absence of answer option "I don't know (yet)" or "not applicable"</li> <li>No opportunity to explain answers or pointing out important outcomes</li> <li>Too little attention to physical problems (time point 2)</li> <li>(Timing of) PROM breastfeeding</li> </ul> |
| <b>2. Application of the outcomes in individual care</b> | <ul style="list-style-type: none"> <li>Better preparation for next visit/appointment</li> <li>Discussing topics that were not discussed before</li> <li>Care is personalised based on individual outcomes</li> <li>Discussing outcomes at Time point 5</li> </ul>                                                                                                                           | <ul style="list-style-type: none"> <li>Insufficient information on the aim personalised care based on PROM and PREM</li> <li>Uncertainty when outcomes are discussed</li> <li>Feeling of impersonalised care</li> <li>Unsure of impact on individual quality of care</li> <li>Discontinuity of care professional</li> </ul>                                                                                                                                                             |
| <b>3. Discussing PREMs</b>                               | <ul style="list-style-type: none"> <li>PREM being included in the questionnaires</li> <li>Insight in individual PREM improves individual quality of care</li> <li>Discussing PREM at Time point 5 important for reflection on pregnancy and childbirth</li> <li>Analysis of aggregate PREM for care improvement</li> <li>Completing PREM safer option in case of dissatisfaction</li> </ul> | <ul style="list-style-type: none"> <li>Receiving multiple questionnaires regarding experiences</li> <li>Negative PREM preferably face to face</li> <li>Dependency of care professional</li> </ul>                                                                                                                                                                                                                                                                                       |
| <b>4. Data capture tool</b>                              | <ul style="list-style-type: none"> <li>Completing questionnaires digitally</li> <li>Availability on mobile phones or tablets</li> </ul>                                                                                                                                                                                                                                                     | <ul style="list-style-type: none"> <li>Technical problems and bugs</li> <li>Privacy issues</li> </ul>                                                                                                                                                                                                                                                                                                                                                                                   |

2 *PROM: patient-reported outcome measures, PREM: patient-reported experience measures*

## DISCUSSION

This mixed methods study provides insight into the first experiences of patients with completing and discussing PROM and PREM at different time points during and after pregnancy as part of routine perinatal care. The evaluation survey results showed that the time spent on completing the PROM and PREM was acceptable, and their content was comprehensive. Most survey participants felt the need to discuss the outcomes. In the interviews, participants were mainly positive about discussing their individual PROM and PREM outcomes with their perinatal care professionals. Patients' barriers and facilitators to complete and discuss PROM and PREM individually were identified in four overarching themes.

### *Strengths and limitations*

A strength of this study was the prospective design, incorporated in an implementation project as part of regular care. Its results supported further implementation of the outcome set, as they were directly translated into adaptations in the clinical project, such as IT improvements and an option to further explain an answer. Another strength was the large sample size of survey participants combined with semi-structured interviews to explore survey answers in-depth, which increased the generalizability of our results. Also, the participation threshold was lowered by conducting the survey anonymously and the interviews by telephone, limiting the risk of selection bias. However, despite our efforts to minimize the risk of selection bias with as well, mostly higher educated women were included, and only Dutch speaking women could participate to the surveys. This was inevitable to some extent, as the sample was taken from an already selected population: women completing the PROM and PREM were Dutch speaking only and had a relatively good health literacy, as no support was provided with completing them. Nevertheless, this exploration of patient experiences with individual PROM and PREM was the first among women receiving perinatal care. A second limitation,

1  
2  
3 27 resulting from the outline of the implementation project, was the unequal representation of time  
4  
5 28 points for PROM and PREM collection in our interviews. Despite our strategy to ask care  
6  
7 29 professionals to recruit participants for the interviews directly, i.e., without filling out the survey, we  
8  
9  
10 30 could not interview women who had completed PROM and PREM at time point 3 (maternity week).  
11  
12  
13 31

14  
15 32 *Compared with literature*

16  
17  
18 33 In line with findings in other disciplines, discussing PROM and PREM with care professionals as part  
19  
20 34 of routine perinatal care was found to improve patient satisfaction and willingness to complete the  
21  
22 35 questionnaires.[4, 14-16] Participants felt better prepared for their next visit and discussed topics  
23  
24 36 that were not discussed before, which reconfirms results from large studies in chronic care  
25  
26  
27 37 settings.[16-18] At the same time, a significant part of our survey respondents did not feel the need  
28  
29 38 to discuss their outcomes. Moreover, for some women completing the questionnaires even felt as  
30  
31 39 impersonalized care. As the survey was offered directly after completing the PROM and PREM,  
32  
33 40 survey participants had not yet discussed their outcomes with their care professional. These findings  
34  
35  
36 41 indicate that discussing outcomes are an essential part of using PROM and PREM in clinical  
37  
38 42 practice.[4] Another explanation could be inadequate information provision, as several women  
39  
40 43 stated that the purpose of the PROM and PREM was unclear to them. As patients' perception of this  
41  
42 44 purpose largely depends on their care professional, care professionals may improve this by actively  
43  
44 45 using PROM and PREM as a part of routine care. For example, by encouraging women to consider  
45  
46 46 which outcomes they want to discuss in the next visit.  
47  
48  
49  
50 47

51  
52  
53 48 Using individual outcomes to tailor care was an important facilitator to complete PROM and PREM  
54  
55 49 over the course of pregnancy and postpartum. Nevertheless, two important barriers to use PROM  
56  
57 50 and PREM individually were raised by our participants as well. First, discrepancy between the  
58  
59 51 timelines of provided care and the PROM and PREM was pointed out. For example, a PREM  
60

1  
2  
3 52 questioning information provision on pain relief was sent to women, before care professionals  
4  
5 53 addressed this topic according to standard care. Secondly, discontinuity in care professional was  
6  
7 54 posed as a barrier, as discussing PROM and PREM with different care professionals lead to discomfort  
8  
9  
10 55 among participants. Discussing outcomes in the multidisciplinary setting of perinatal care may be  
11  
12 56 easier if a principal care professional is allocated to every pregnant woman. A relationship of trust  
13  
14 57 between care professional and patients may be a crucial facilitator completing and discussing PROM  
15  
16 58 and PREM, especially for discussing taboo topics such as incontinence.[19] This may provide  
17  
18 59 opportunity to improve perinatal care outcomes, as several taboo topics have been shown highly  
19  
20 60 prevalent and only 15% of the affected women bring this up during a postpartum check-up.[20, 21]  
21  
22  
23 61 Additionally, although hard to accomplish by perinatal care professionals, our participants stated that  
24  
25 62 evaluating their outcomes at six months postpartum with a perinatal care professional was of added  
26  
27 63 value to the regular postpartum check-up. This reconfirms previously reported patient views  
28  
29 64 regarding time point five of the PCB set.[8, 9] Compared to the check-up-up at six weeks postpartum,  
30  
31 65 at six months postpartum most women have further recovered in multiple domains and resumed  
32  
33 66 their work and social life. Hence, at this moment, the sustainability and severity of physical or mental  
34  
35 67 problems can be determined and referred for, improving long-term outcomes of perinatal care.  
36  
37  
38  
39 68  
40  
41 69 Confirming pre-implementation studies, our participants emphasized that PREM were an important  
42  
43 70 facilitator to complete the questionnaires.[8, 9] However, evidence on individual PREM use as part of  
44  
45 71 clinical practice is scarce. This study revealed different opinions amongst patients: some preferred to  
46  
47 72 address negative experiences face to face, some felt PREM made it easier to raise and others felt too  
48  
49 73 dependent on their care professional to discuss a negative experience at all. Future research should  
50  
51 74 evaluate the possible effects of offering each woman a choice whether her individual answers are  
52  
53 75 visible to care professionals and discussed as part of her care.  
54  
55  
56  
57  
58 76  
59  
60

1  
2  
3 77 As shown before from a professional perspective, a good functioning data capture tool for  
4  
5 78 assessment and real-life visualisation of patient reported measures is essential for successful  
6  
7 79 implementation.[4, 22, 23] In our patient evaluation, technological issues of the data capture tools  
8  
9 80 were also a major barrier for completing the questionnaires. Although challenging in terms of inter-  
10  
11 81 organisational collaboration and IT infrastructure, this project was one of the first to attempt system  
12  
13 82 wide implementation of PROM and PREM in routine perinatal care. In the transformation towards  
14  
15 83 health care systems that provide patient-centred care over the full cycle of care, it is essential to use  
16  
17 84 data capture tools that facilitate information exchange between all health care tiers involved with a  
18  
19 85 disease or condition.  
20  
21  
22  
23  
24 86

### 26 87 *Future research and implications*

28  
29 88 To achieve personalized care based on PROM and PREM, patient engagement is essential but  
30  
31 89 requires efforts at several points. For successful implementation, patients will benefit from a system-  
32  
33 90 wide data capture tool, a principal care professional to discuss their outcomes with and a timeline of  
34  
35 91 PROM and PREM collection that fits clinical care: matching their appointments and content of care  
36  
37 92 pathways. Also, an open text field to explain answers and point out outcomes they want to discuss  
38  
39 93 could empower patients to take an active role in their care. Lastly, when completing PROM and  
40  
41 94 PREM, patients should be clearly informed about 1) the purpose of using their answers for  
42  
43 95 personalized care and 2) the topics addressed by the questionnaires at each time point and their  
44  
45 96 relation to pregnancy and childbirth. Since care professionals are crucial in providing this information  
46  
47 97 and in discussing the outcomes, future research may focus on the experiences of care professionals  
48  
49 98 with PROM and PREM use in perinatal care. To engage care professionals, it would be useful to  
50  
51 99 evaluate training strategies, but also their perceived benefits when working with PROM and PREM.  
52  
53 100 These could include direct improvement of individual care for their patients, as well as insight in the  
54  
55 101 results of their efforts in terms of patient outcomes.[24]  
56  
57  
58  
59  
60

1  
2  
3 102  
4  
5

6 103 *Conclusions*  
7

8  
9 104 This study reported the first patient experiences with completing and discussing PROM and PREM as  
10  
11 105 part of perinatal care. The ICHOM PCB set was found to be an acceptable and useful instrument for  
12  
13 106 symptom detection and personalized perinatal care up until 6 months postpartum. Patients'  
14  
15 107 reflections on these PROM and PREM allow several improvements of the content of the  
16  
17 108 questionnaires, the role of care professionals and congruity with routine care pathways.  
18  
19  
20  
21  
22  
23  
24  
25  
26  
27  
28  
29  
30  
31  
32  
33  
34  
35  
36  
37  
38  
39  
40  
41  
42  
43  
44  
45  
46  
47  
48  
49  
50  
51  
52  
53  
54  
55  
56  
57  
58  
59  
60



## 109 Acknowledgements

110 We acknowledge the women participating in this study. We thank the participating care  
111 professionals for approaching women and for discussing the PROMs and PREMs.

## 113 Funding statement:

114 This work was supported by Zorginstituut Nederland (ZIN) grant number 2018026697.

## 115 Competing interests statement:

116 AF and ML were chair and member respectively of the ICHOM working group that developed the PCB  
117 standard outcome set. The other authors have nothing to declare.

## 119 Contribution to Authorship

120 LL, AD, ML, AF, HE and MB designed the study. LL and SK performed the data collection. LL and SK  
121 analysed the data under supervision of MB. All authors interpreted the data. LL and AD wrote the  
122 first version of the manuscript. All authors revised all versions of the manuscript and approved the  
123 final version.

## 125 Details of Ethics Approval

126 The Medical Ethics Committee Erasmus Medical Centre (MEC-2020-0129) declared that the rules laid  
127 down in the Medical Research Involving Human Subjects Act (also known as WMO) do not apply to  
128 this study. This study was exempt from formal medical ethical assessment. Local approval of the

1  
2  
3 129 regional ethical boards was obtained in each participating OCN. All participants signed written  
4  
5 130 informed consent.  
6

7  
8 131

9  
10 132 **Data availability statement**  
11

12  
13  
14 133 Data are available upon reasonable request.  
15  
16

17  
18  
19  
20  
21  
22  
23  
24  
25  
26  
27  
28  
29  
30  
31  
32  
33  
34  
35  
36  
37  
38  
39  
40  
41  
42  
43  
44  
45  
46  
47  
48  
49  
50  
51  
52  
53  
54  
55  
56  
57  
58  
59  
60

For peer review only

**References**

1. Porter ME, Teisberg EO. Redefining health care: creating value-based competition on results: Harvard Business Press; 2006.
2. Basch E. Patient-reported outcomes—harnessing patients’ voices to improve clinical care. *New England Journal of Medicine*. 2017;376(2):105-8.
3. Basch E, Barbera L, Kerrigan CL, Velikova G. Implementation of patient-reported outcomes in routine medical care. *American Society of Clinical Oncology Educational Book*. 2018;38:122-34.
4. van Egdom LSE, Oemrawsingh A, Verweij LM, Lingsma HF, Koppert LB, Verhoef C, et al. Implementing patient-reported outcome measures in clinical breast cancer care: a systematic review. *Value in Health*. 2019;22(10):1197-226.
5. Martin CJH, Martin CR. Development and psychometric properties of the Birth Satisfaction Scale-Revised (BSS-R). *Midwifery*. 2014;30(6):610-9.
6. Mason L, Glenn S, Walton I, Appleton C. The experience of stress incontinence after childbirth. *Birth*. 1999;26(3):164-71.
7. Nijagal MA, Wissig S, Stowell C, Olson E, Amer-Wahlin I, Bonsel G, et al. Standardized outcome measures for pregnancy and childbirth, an ICHOM proposal. *BMC Health Serv Res*. 2018;18(1):953.
8. Depla AL, Ernst-Smelt HE, Poels M, Crombag NM, Franx A, Bekker MN. A feasibility study of implementing a patient-centered outcome set for pregnancy and childbirth. *Health Sci Rep*. 2020;3(3):e168.
9. Laureij LT, Been JV, Lugtenberg M, Ernst-Smelt HE, Franx A, Hazelzet JA, et al. Exploring the applicability of the pregnancy and childbirth outcome set: A mixed methods study. *Patient Educ Couns*. 2019.
10. Damschroder LJ, Aron DC, Keith RE, Kirsh SR, Alexander JA, Lowery JC. Fostering implementation of health services research findings into practice: a consolidated framework for advancing implementation science. *Implement Sci*. 2009;4:50.
11. Pharos. Pharos 2022 [Available from: <https://www.pharos.nl/>].
12. Green J, Thorogood N. *Qualitative methods for health research*: Sage; 2018.
13. O'Brien BC, Harris IB, Beckman TJ, Reed DA, Cook DA. Standards for reporting qualitative research: a synthesis of recommendations. *Acad Med*. 2014;89(9):1245-51.
14. Chen J, Ou L, Hollis SJ. A systematic review of the impact of routine collection of patient reported outcome measures on patients, providers and health organisations in an oncologic setting. *BMC health services research*. 2013;13(1):1-24.
15. Basch E, Deal AM, Dueck AC, Scher HI, Kris MG, Hudis C, et al. Overall Survival Results of a Trial Assessing Patient-Reported Outcomes for Symptom Monitoring During Routine Cancer Treatment. *Jama*. 2017;318(2):197-8.
16. Lapin BR, Honomichl R, Thompson N, Rose S, Abelson A, Deal C, et al. Patient-reported experience with patient-reported outcome measures in adult patients seen in rheumatology clinics. *Qual Life Res*. 2021;30(4):1073-82.
17. Lapin B, Udeh B, Bautista JF, Katzan IL. Patient experience with patient-reported outcome measures in neurologic practice. *Neurology*. 2018;91(12):e1135-e51.
18. van der Horst C. Personalized Health Care for Orofacial Cleft Patients. In: van Weert N, Hazelzet J, editors. *Personalized Specialty Care: Value-Based Healthcare Frontrunners from the Netherlands*. Cham: Springer International Publishing; 2021. p. 41-7.
19. Oemrawsingh A, Hazelzet J, Koppert L. The State of Patient-Centered Breast Cancer Care: An Academic Center’s Experience and Perspective. *Personalized Specialty Care*: Springer; 2021. p. 127-35.
20. Schütze S, Hohlfeld B, Friedl TWP, Otto S, Kraft K, Hancke K, et al. Fishing for (in) continence: long-term follow-up of women with OASIS—still a taboo. *Archives of Gynecology and Obstetrics*. 2021;303(4):987-97.
21. Depla AL, Lamain-de Ruyter M, Laureij LT, Ernst-Smelt H, Hazelzet J, Franx A, et al. Patient reported outcomes and experience measures in perinatal care to guide clinical practice: the first

- 1  
2  
3 186 results. JMIR. 2022, *accepted for publication*
- 4 187 22. Foster A, Croot L, Brazier J, Harris J, O’Cathain A. The facilitators and barriers to  
5 188 implementing patient reported outcome measures in organisations delivering health related  
6 189 services: a systematic review of reviews. Journal of patient-reported outcomes. 2018;2(1):1-16.
- 7 190 23. Arora J, Haj M. Implementing ICHOM’s standard sets of outcomes: cleft lip and palate at  
8 191 Erasmus University Medical Centre in the Netherlands. International Consortium for Health  
9 192 Outcomes Measurement (ICHOM), London. 2016.
- 10 193 24. Depla AL, Crombag NM, Franx A, Bekker MN. Implementation of a standard outcome set in  
11 194 perinatal care: a qualitative analysis of barriers and facilitators from all stakeholder perspectives.  
12 195 BMC Health Serv Res. 2021;21(1):113.

13  
14  
15 196

16  
17 197

18  
19  
20  
21  
22  
23  
24  
25  
26  
27  
28  
29  
30  
31  
32  
33  
34  
35  
36  
37  
38  
39  
40  
41  
42  
43  
44  
45  
46  
47  
48  
49  
50  
51  
52  
53  
54  
55  
56  
57  
58  
59  
60

For peer review only

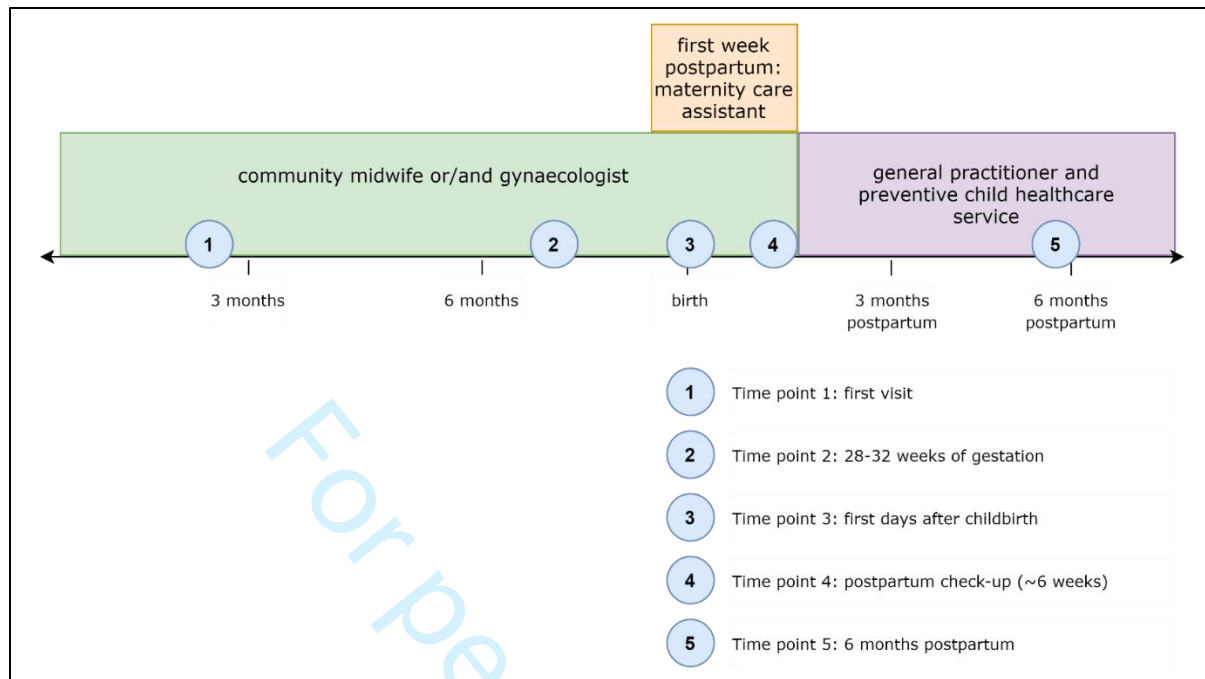

**Figure 1** Time points for data collection (PROM and PREM) and involvement of different care professionals, according to current practice in the Netherlands.

*The blue dots indicate the five time points for data collection during pregnancy and postpartum. Above the timeline, the involved care professionals are shown. In this project, the outcomes of the PROMs and PREMs were discussed with an obstetric care professional during all time points. [7]*

**Supplementary Table 1 Evaluation survey**

|                                                                      |          |
|----------------------------------------------------------------------|----------|
| <b>Q1) I found the time needed to complete the PROM and PREM ...</b> |          |
| <input type="checkbox"/>                                             | Too much |
| <input type="checkbox"/>                                             | A lot    |
| <input type="checkbox"/>                                             | Good     |
| <input type="checkbox"/>                                             | Short    |

|                                                                  |                                        |
|------------------------------------------------------------------|----------------------------------------|
| <b>Q2) Were you able to properly complete all PROM and PREM?</b> |                                        |
| <input type="checkbox"/>                                         | Yes                                    |
| <input type="checkbox"/>                                         | No, I did not understand all questions |
| <input type="checkbox"/>                                         | No, the questions were too personal    |
| <input type="checkbox"/>                                         | Other: .....                           |

|                                                                                                                                                            |                          |                                      |
|------------------------------------------------------------------------------------------------------------------------------------------------------------|--------------------------|--------------------------------------|
| <b>Q3) During the next visit, you will discuss the outcomes of the PROM and PREM with you care provider. Do you feel the need to discuss the outcomes?</b> |                          |                                      |
| <input type="checkbox"/>                                                                                                                                   | Yes                      | → Go to question 3b                  |
| <input type="checkbox"/>                                                                                                                                   | A little                 | → Go to question 3b                  |
| <input type="checkbox"/>                                                                                                                                   | Not really               | → Go to question 3c                  |
| <input type="checkbox"/>                                                                                                                                   | Not at all               | → Go to question 3c                  |
| <b>Q3b) Who do you prefer to discuss your outcomes with?</b>                                                                                               | <input type="checkbox"/> | Community midwife                    |
|                                                                                                                                                            | <input type="checkbox"/> | Clinical midwife                     |
|                                                                                                                                                            | <input type="checkbox"/> | Gynaecologist                        |
|                                                                                                                                                            | <input type="checkbox"/> | Maternity care assistant or nurse    |
|                                                                                                                                                            | <input type="checkbox"/> | Preventive Child Healthcare services |
|                                                                                                                                                            | <input type="checkbox"/> | General practitioner                 |
| <b>Q3c) Can you please explain why you do not prefer to discuss your outcomes?</b>                                                                         | <input type="checkbox"/> | .....                                |
|                                                                                                                                                            | <input type="checkbox"/> | .....                                |
|                                                                                                                                                            | <input type="checkbox"/> | .....                                |
|                                                                                                                                                            | <input type="checkbox"/> | .....                                |

|                                                                                                |       |
|------------------------------------------------------------------------------------------------|-------|
| <b>Q4) Do you have any remarks regarding the PROM and PREM or suggestions for improvement?</b> |       |
| <input type="checkbox"/>                                                                       | ..... |
| <input type="checkbox"/>                                                                       | ..... |
| <input type="checkbox"/>                                                                       | ..... |

|                                                                                 |                                    |
|---------------------------------------------------------------------------------|------------------------------------|
| <b>Q5) Do you give permission for an evaluation by telephone in the future?</b> |                                    |
| <input type="checkbox"/>                                                        | Yes, my telephone number is: ..... |
| <input type="checkbox"/>                                                        | No                                 |

*PROM: patient reported outcome measures. PREM: patient reported experience measures*

1  
2  
3  
4  
5  
6  
7  
8  
9  
10  
11  
12  
13  
14  
15  
16  
17  
18  
19  
20  
21  
22  
23  
24  
25  
26  
27  
28  
29  
30  
31  
32  
33  
34  
35  
36  
37  
38  
39  
40  
41  
42  
43  
44  
45  
46  
47  
48  
49  
50  
51  
52  
53  
54  
55  
56  
57  
58  
59  
60

**Supplementary Table 2 Survey participants per time point**

| <b>Time point</b> | <b>n</b>   |
|-------------------|------------|
| <b>T1</b>         | 93         |
| <b>T2</b>         | 337        |
| <b>T3</b>         | 10         |
| <b>T4</b>         | 9          |
| <b>T5</b>         | 11         |
| <b>Total</b>      | <b>460</b> |

For peer review only

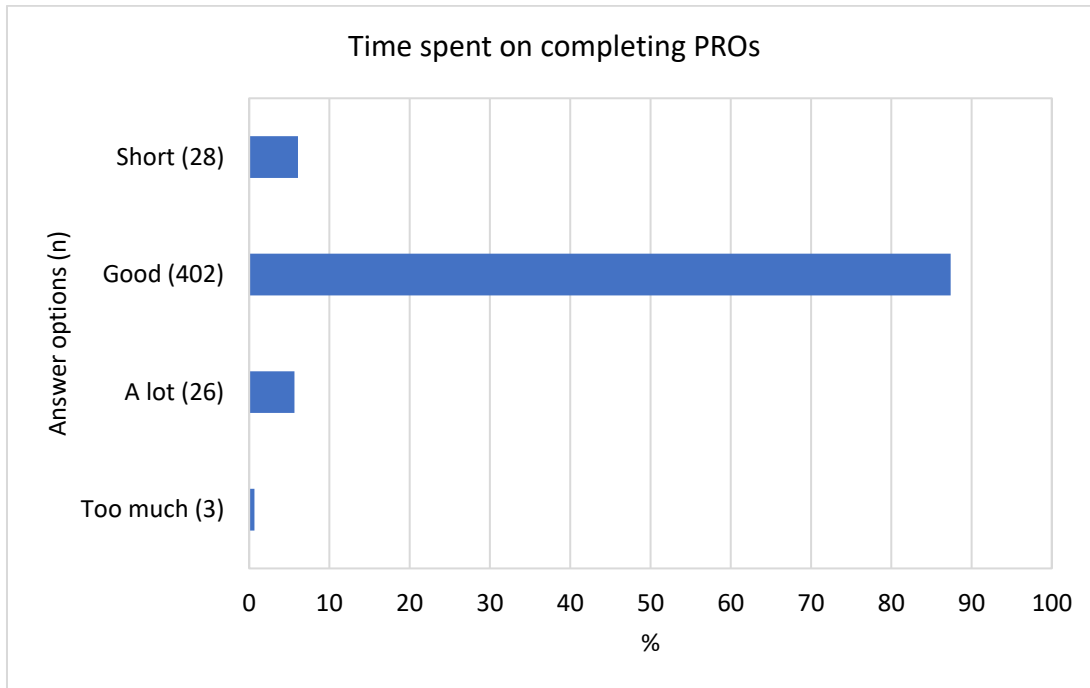

**Supplementary Figure 1a** Q1 I found the time needed to complete the PROM and PREM...

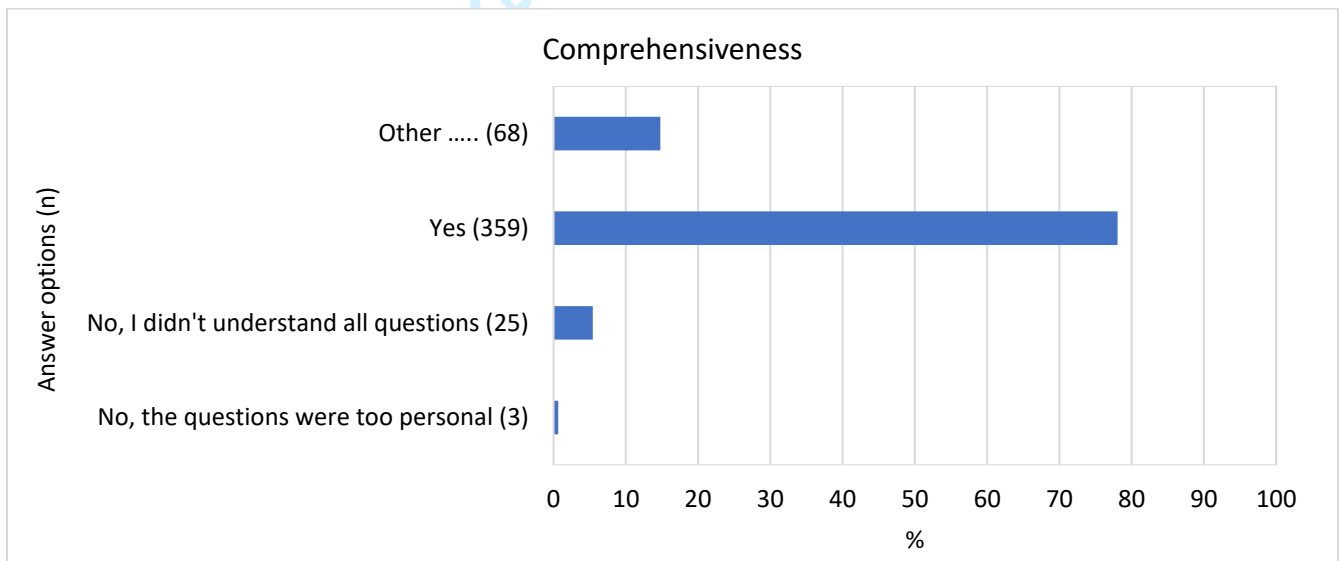

**Supplementary Figure 1b** Q2 Were you able to properly complete all PROM and PREM?



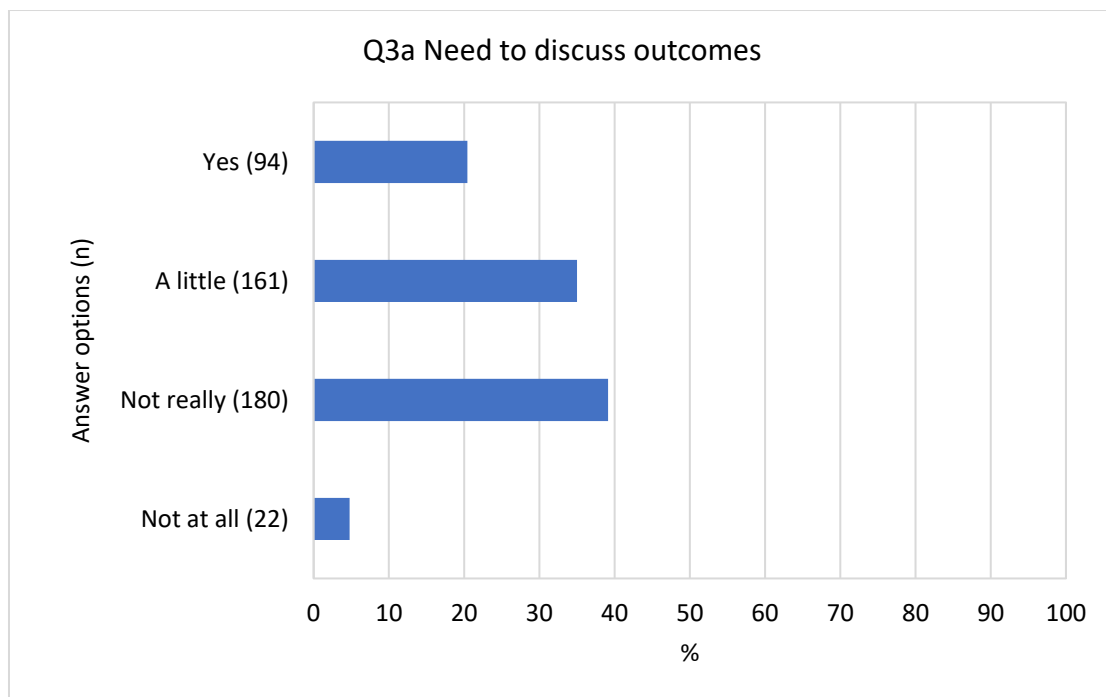

**Supplementary Figure 1c** Q3 During the next visit, you will discuss the outcomes of the PROM and PREM with you care provider. Do you feel the need to discuss the outcomes?

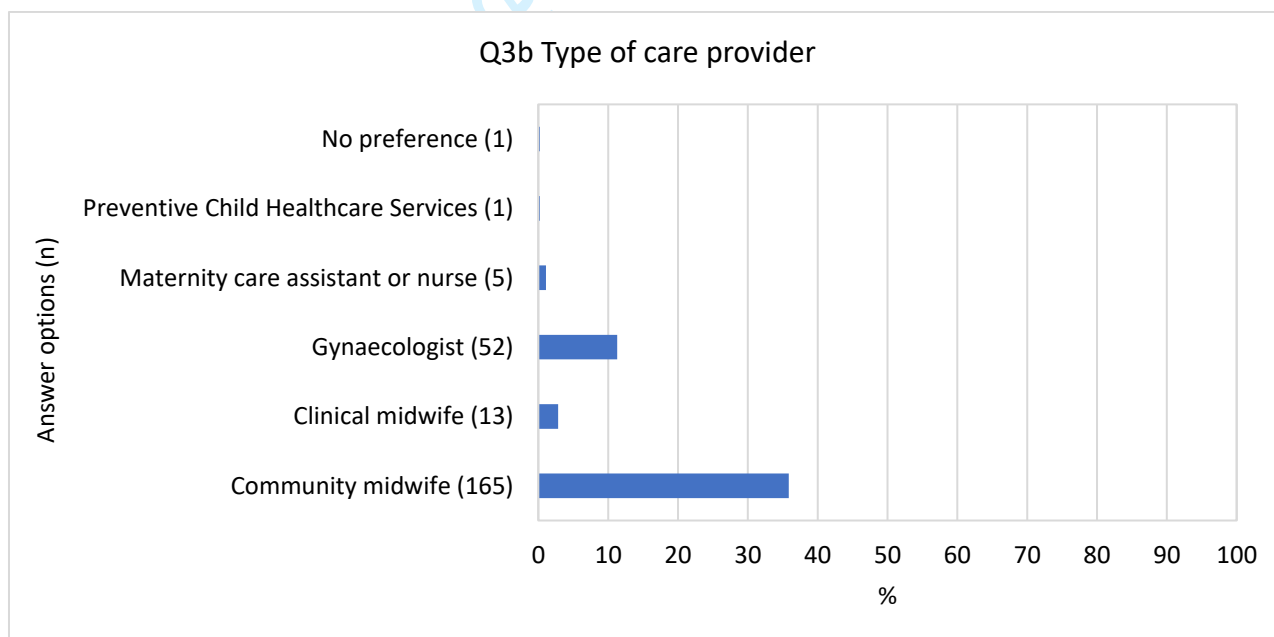

**Supplementary Figure 1d** Q3b Who do you prefer to discuss your outcomes with?

## Standards for Reporting Qualitative Research (SRQR)\*

<http://www.equator-network.org/reporting-guidelines/srqr/>

Page/line no(s).

### Title and abstract

|                                                                                                                                                                                                                                                              |        |
|--------------------------------------------------------------------------------------------------------------------------------------------------------------------------------------------------------------------------------------------------------------|--------|
| <p><b>Title</b> - Concise description of the nature and topic of the study Identifying the study as qualitative or indicating the approach (e.g., ethnography, grounded theory) or data collection methods (e.g., interview, focus group) is recommended</p> | 1/ 1-2 |
| <p><b>Abstract</b> - Summary of key elements of the study using the abstract format of the intended publication; typically includes background, purpose, methods, results, and conclusions</p>                                                               | 2-3    |

### Introduction

|                                                                                                                                                                     |             |
|---------------------------------------------------------------------------------------------------------------------------------------------------------------------|-------------|
| <p><b>Problem formulation</b> - Description and significance of the problem/phenomenon studied; review of relevant theory and empirical work; problem statement</p> | 4-5/117-126 |
| <p><b>Purpose or research question</b> - Purpose of the study and specific objectives or questions</p>                                                              | 5/124-126   |

### Methods

|                                                                                                                                                                                                                                                                                                                                                                                                             |                        |
|-------------------------------------------------------------------------------------------------------------------------------------------------------------------------------------------------------------------------------------------------------------------------------------------------------------------------------------------------------------------------------------------------------------|------------------------|
| <p><b>Qualitative approach and research paradigm</b> - Qualitative approach (e.g., ethnography, grounded theory, case study, phenomenology, narrative research) and guiding theory if appropriate; identifying the research paradigm (e.g., postpositivist, constructivist/ interpretivist) is also recommended; rationale**</p>                                                                            | 6, 129-130             |
| <p><b>Researcher characteristics and reflexivity</b> - Researchers' characteristics that may influence the research, including personal attributes, qualifications/experience, relationship with participants, assumptions, and/or presuppositions; potential or actual interaction between researchers' characteristics and the research questions, approach, methods, results, and/or transferability</p> | 10/187-199             |
| <p><b>Context</b> - Setting/site and salient contextual factors; rationale**</p>                                                                                                                                                                                                                                                                                                                            | 7/160-166<br>8/176-179 |
| <p><b>Sampling strategy</b> - How and why research participants, documents, or events were selected; criteria for deciding when no further sampling was necessary (e.g., sampling saturation); rationale**</p>                                                                                                                                                                                              | 8/159-170<br>8/177-184 |
| <p><b>Ethical issues pertaining to human subjects</b> - Documentation of approval by an appropriate ethics review board and participant consent, or explanation for lack thereof; other confidentiality and data security issues</p>                                                                                                                                                                        | 25/466-471             |
| <p><b>Data collection methods</b> - Types of data collected; details of data collection procedures including (as appropriate) start and stop dates of data collection and analysis, iterative process, triangulation of sources/methods, and modification of procedures in response to evolving study findings; rationale**</p>                                                                             | 6/134-135<br>8/172-184 |

|                       |                                                                                                                                                                                                                                                       |                                      |
|-----------------------|-------------------------------------------------------------------------------------------------------------------------------------------------------------------------------------------------------------------------------------------------------|--------------------------------------|
| 1<br>2<br>3<br>4<br>5 | <b>Data collection instruments and technologies</b> - Description of instruments (e.g., interview guides, questionnaires) and devices (e.g., audio recorders) used for data collection; if/how the instrument(s) changed over the course of the study | 7/176-179, 183-184                   |
| 6<br>7<br>8           | <b>Units of study</b> - Number and relevant characteristics of participants, documents, or events included in the study; level of participation (could be reported in results)                                                                        | 11/213-222                           |
| 9<br>10<br>11<br>12   | <b>Data processing</b> - Methods for processing data prior to and during analysis, including transcription, data entry, data management and security, verification of data integrity, data coding, and anonymization/de-identification of excerpts    | 10/188-192                           |
| 13<br>14<br>15<br>16  | <b>Data analysis</b> - Process by which inferences, themes, etc., were identified and developed, including the researchers involved in data analysis; usually references a specific paradigm or approach; rationale**                                 | 10/187-199                           |
| 17<br>18<br>19<br>20  | <b>Techniques to enhance trustworthiness</b> - Techniques to enhance trustworthiness and credibility of data analysis (e.g., member checking, audit trail, triangulation); rationale**                                                                | 6, 129-130<br>10/192-193,<br>197-198 |

### Results/findings

|                      |                                                                                                                                                                                                   |                           |
|----------------------|---------------------------------------------------------------------------------------------------------------------------------------------------------------------------------------------------|---------------------------|
| 23<br>24<br>25<br>26 | <b>Synthesis and interpretation</b> - Main findings (e.g., interpretations, inferences, and themes); might include development of a theory or model, or integration with prior research or theory | 11-12/224-228,<br>Table 2 |
| 27<br>28<br>29       | <b>Links to empirical data</b> - Evidence (e.g., quotes, field notes, text excerpts, photographs) to substantiate analytic findings                                                               | Quote 1-10                |

### Discussion

|                                  |                                                                                                                                                                                                                                                                                                                                                                                                             |                           |
|----------------------------------|-------------------------------------------------------------------------------------------------------------------------------------------------------------------------------------------------------------------------------------------------------------------------------------------------------------------------------------------------------------------------------------------------------------|---------------------------|
| 32<br>33<br>34<br>35<br>36<br>37 | <b>Integration with prior work, implications, transferability, and contribution(s) to the field</b> - Short summary of main findings; explanation of how findings and conclusions connect to, support, elaborate on, or challenge conclusions of earlier scholarship; discussion of scope of application/generalizability; identification of unique contribution(s) to scholarship in a discipline or field | 20/342-349, 21-23/371-424 |
| 38<br>39                         | <b>Limitations</b> - Trustworthiness and limitations of findings                                                                                                                                                                                                                                                                                                                                            | 20/ 351-368               |

### Other

|                |                                                                                                                                               |            |
|----------------|-----------------------------------------------------------------------------------------------------------------------------------------------|------------|
| 42<br>43<br>44 | <b>Conflicts of interest</b> - Potential sources of influence or perceived influence on study conduct and conclusions; how these were managed | 24/454-456 |
| 45<br>46       | <b>Funding</b> - Sources of funding and other support; role of funders in data collection, interpretation, and reporting                      | 24/452-453 |

\*The authors created the SRQR by searching the literature to identify guidelines, reporting standards, and critical appraisal criteria for qualitative research; reviewing the reference lists of retrieved sources; and contacting experts to gain feedback. The SRQR aims to improve the transparency of all aspects of qualitative research by providing clear standards for reporting qualitative research.

1  
2  
3  
4  
5  
6  
7  
8  
9  
10  
11  
12  
13  
14  
15  
16  
17  
18  
19  
20  
21  
22  
23  
24  
25  
26  
27  
28  
29  
30  
31  
32  
33  
34  
35  
36  
37  
38  
39  
40  
41  
42  
43  
44  
45  
46  
47  
48  
49  
50  
51  
52  
53  
54  
55  
56  
57  
58  
59  
60

\*\*The rationale should briefly discuss the justification for choosing that theory, approach, method, or technique rather than other options available, the assumptions and limitations implicit in those choices, and how those choices influence study conclusions and transferability. As appropriate, the rationale for several items might be discussed together.

**Reference:**

O'Brien BC, Harris IB, Beckman TJ, Reed DA, Cook DA. **Standards for reporting qualitative research: a synthesis of recommendations.** *Academic Medicine*, Vol. 89, No. 9 / Sept 2014  
DOI: 10.1097/ACM.0000000000000388

For peer review only

# BMJ Open

## Women's experiences with using patient-reported outcome and experience measures in routine perinatal care in the Netherlands: a mixed methods study

|                                 |                                                                                                                                                                                                                                                                                                                                                                                                                                                                                                                                                                    |
|---------------------------------|--------------------------------------------------------------------------------------------------------------------------------------------------------------------------------------------------------------------------------------------------------------------------------------------------------------------------------------------------------------------------------------------------------------------------------------------------------------------------------------------------------------------------------------------------------------------|
| Journal:                        | <i>BMJ Open</i>                                                                                                                                                                                                                                                                                                                                                                                                                                                                                                                                                    |
| Manuscript ID                   | bmjopen-2022-064452.R1                                                                                                                                                                                                                                                                                                                                                                                                                                                                                                                                             |
| Article Type:                   | Original research                                                                                                                                                                                                                                                                                                                                                                                                                                                                                                                                                  |
| Date Submitted by the Author:   | 19-Aug-2022                                                                                                                                                                                                                                                                                                                                                                                                                                                                                                                                                        |
| Complete List of Authors:       | Laureij, Lyzette; Erasmus MC, Obstetrics and Gynaecology<br>Depla, Anne; UMC Utrecht<br>Kariman, Shariva; UMC Utrecht, Department of Obstetrics and Gynaecology<br>Lamain-de Ruiters, Marije; Erasmus MC, Department of Obstetrics and Gynaecology; UMC Utrecht, Department of Obstetrics and Gynaecology<br>Ernst -Smelt, Hiske; Erasmus MC, Department of Obstetrics and Gynaecology<br>Hazelzet, Jan; Erasmus MC, Department of Public Health<br>Franx, Arie; Erasmus MC, Obstetrics and Gynaecology<br>Bekker, Mireille; UMC Utrecht<br>Team, Buzz; Erasmus MC |
| <b>Primary Subject Heading</b>: | Obstetrics and gynaecology                                                                                                                                                                                                                                                                                                                                                                                                                                                                                                                                         |
| Secondary Subject Heading:      | Qualitative research                                                                                                                                                                                                                                                                                                                                                                                                                                                                                                                                               |
| Keywords:                       | OBSTETRICS, QUALITATIVE RESEARCH, PRIMARY CARE, HEALTH SERVICES ADMINISTRATION & MANAGEMENT                                                                                                                                                                                                                                                                                                                                                                                                                                                                        |
|                                 |                                                                                                                                                                                                                                                                                                                                                                                                                                                                                                                                                                    |

SCHOLARONE™  
Manuscripts



I, the Submitting Author has the right to grant and does grant on behalf of all authors of the Work (as defined in the below author licence), an exclusive licence and/or a non-exclusive licence for contributions from authors who are: i) UK Crown employees; ii) where BMJ has agreed a CC-BY licence shall apply, and/or iii) in accordance with the terms applicable for US Federal Government officers or employees acting as part of their official duties; on a worldwide, perpetual, irrevocable, royalty-free basis to BMJ Publishing Group Ltd ("BMJ") its licensees and where the relevant Journal is co-owned by BMJ to the co-owners of the Journal, to publish the Work in this journal and any other BMJ products and to exploit all rights, as set out in our [licence](#).

The Submitting Author accepts and understands that any supply made under these terms is made by BMJ to the Submitting Author unless you are acting as an employee on behalf of your employer or a postgraduate student of an affiliated institution which is paying any applicable article publishing charge ("APC") for Open Access articles. Where the Submitting Author wishes to make the Work available on an Open Access basis (and intends to pay the relevant APC), the terms of reuse of such Open Access shall be governed by a Creative Commons licence – details of these licences and which [Creative Commons](#) licence will apply to this Work are set out in our licence referred to above.

Other than as permitted in any relevant BMJ Author's Self Archiving Policies, I confirm this Work has not been accepted for publication elsewhere, is not being considered for publication elsewhere and does not duplicate material already published. I confirm all authors consent to publication of this Work and authorise the granting of this licence.

1  
2  
3 **Women's experiences with using patient-reported outcome and experience measures in routine**  
4 **perinatal care in the Netherlands: a mixed methods study**

5 Lyzette T. Laureij<sup>1</sup>, Anne L. Depla<sup>2</sup>, Shariva S. Kariman<sup>2</sup>, Marije Lamain-de Ruiten<sup>1,2</sup>, Hiske E. Ernst-  
6 Smelt<sup>1</sup>, Jan Hazelzet<sup>3</sup>, Arie Franx<sup>1</sup>, Mireille N. Bekker<sup>2</sup> - on behalf of the BUZZ project team\*

7  
8  
9 Corresponding author:

10 M.N. Bekker

11 KE.04.123.1, Lundlaan 6, 3584 EA, Utrecht, The Netherlands

12 Tel: +31887553981

13 E-mail: <m.n.bekker-3@umcutrecht.nl>

14  
15  
16 Affiliations:

17  
18 <sup>1</sup> Department of Obstetrics and Gynaecology, Division Obstetrics and Foetal Medicine,  
19 Erasmus MC, Rotterdam, the Netherlands

20  
21 <sup>2</sup> Department of Obstetrics and Gynaecology, Wilhemina Children's Hospital, University  
22 Medical Centre Utrecht, the Netherlands

23  
24 <sup>3</sup> Department of Public Health, Erasmus MC, Rotterdam, the Netherlands

25  
26 \* Next to the authors, the BUZZ team consisted of Jolanda H. Vermolen<sup>4</sup>, Simone A. Vankan-  
27 Buitelaar<sup>2</sup>, Monique Klerkx<sup>5</sup>, Pieter-Kees de Groot<sup>6</sup>, Nikkie Koper<sup>7</sup>, Hilmar H. Bijma<sup>1</sup>, Bas van Rijn<sup>1</sup>,  
28 Elise Neppelenbroek<sup>8</sup>, Sebastiaan W.A. Nij Bijvank<sup>9</sup>, Marieke Veenhof<sup>10</sup>, Margo Lutke Holzik<sup>10</sup>, Jelle  
29 Baalman<sup>11</sup>, Josien Vrielink-Braakman<sup>12</sup>

30  
31  
32 <sup>4</sup> Maternity care organization De Waarden, Schoonhoven, the Netherlands

33 <sup>5</sup> Integrated obstetric care organization Annature Geboortezorg, Breda, the Netherlands

34 <sup>6</sup> Department of Obstetrics, Spaarne Gasthuis, Haarlem, the Netherlands

35 <sup>7</sup> Midwifery practice Duo, Zwanenburg, the Netherlands

36 <sup>8</sup> Midwifery practice Verloskundigen Bakerraad, Zwolle, the Netherlands

37 <sup>9</sup> Department of Obstetrics, Isala Clinics, Zwolle, the Netherlands

38 <sup>10</sup> Department of Obstetrics, Leiden University Medical Center, Leiden, the Netherlands

39 <sup>11</sup> Department of Obstetrics, Medisch Spectrum Twente, Enschede, the Netherlands

40 <sup>12</sup> Midwifery practice Verwacht!, Vriezenveen, the Netherlands

41  
42  
43  
44  
45 Shortened running title: Patient experiences using PROMs and PREMs in perinatal care

46  
47  
48  
49 Wordcount: 4403

50 Number of tables (3) and figures (2)

51 Appendices: 3

## ABSTRACT

### Objective

To gain insight into the experiences of women with completing and discussing patient reported outcome measures (PROM) and patient reported experience measures (PREM), and tailoring their care based on their outcomes.

### Methods

A mixed-methods study was performed in seven obstetric care networks in the Netherlands that implemented a set of patient-centred outcome measures for pregnancy and childbirth (PCB set), published by the International Consortium for Health Outcomes Measurement. All women receiving the PROM and PREM questionnaires as part of their routine perinatal care, received an invitation for a survey (n=460) and an interview (n=16). The results of the survey were analysed using descriptive statistics; thematic inductive content analysis was applied on the data from open text answers and the interviews.

### Results

More than half of the survey participants (n=255) felt the need to discuss the outcomes of PROM and PREM with their care professionals. The time spent on completing questionnaires and the comprehensiveness of the questions was scored 'good' by most of the survey participants. From the interviews, four main themes were identified: content of the PROM and PREM questionnaires, application of these outcomes in perinatal care, discussing PREM, and data capture tool. Important facilitators included awareness of health status, receiving personalised care based on their outcomes and the relevance of discussing PREM six months postpartum. Barriers were found in insufficient information about the goal of PROM and PREM for individual care, technical problems in data capture tools and discrepancy between the questionnaire topics and the care pathway.



## Conclusions

This study showed that women found the PCB set an acceptable and useful instrument for symptom detection and personalised care up until six months postpartum. This patient evaluation of the PCB set has several implications for practice regarding the questionnaire content, role of care professionals and congruity with care pathways.

## Key words:

Value-based healthcare

Obstetrics

Perinatal care

Patient-reported outcome measures

Patient-reported experience measures

Shared decision making

Qualitative research

Quantitative research

Mixed methods

## Article Summary

- This study had a prospective design and was incorporated in an implementation project as part of routine perinatal care.
- As a result of the embedding in an implementation project, we were able to combine the results of a large sample size of survey participants with semi-structured interviews to explore survey answers in-depth, which increased the generalizability of our results.
- These are the first experiences from patient perspective regarding completing and discussing PROMs and PREMs during routine perinatal care.

1  
2  
3  
4  
5  
6  
7  
8  
9  
10  
11  
12  
13  
14  
15  
16  
17  
18  
19  
20  
21  
22  
23  
24  
25  
26  
27  
28  
29  
30  
31  
32  
33  
34  
35  
36  
37  
38  
39  
40  
41  
42  
43  
44  
45  
46  
47  
48  
49  
50  
51  
52  
53  
54  
55  
56  
57  
58  
59  
60

- A limitation of this study was the unequal representation of time points for PROM and PREM collection in our interview sample, due to the nature of the implementation project.

For peer review only

## INTRODUCTION

Healthcare systems are increasingly focusing on creating value for patients.[1] Therefore, patient-reported outcome measures and experience measures (PROM and PREM) are progressively used to guide individual patient care, in quality improvement, and for research purposes. PROM and PREM are defined as information that is provided by patients concerning the impact of their condition, disease or treatment on their health and functioning.[2, 3] In routine care, patients complete PROM and PREM via standardised questionnaires – both generic and disease specific – between visits to care professionals. Care professionals receive notifications about alarm symptoms, such as pain or functional complaints and can review longitudinal PROM and PREM reports over time. This way, symptoms and impairments are more likely to be detected, creating an opportunity to personalise care based on individual needs.[4] In chronic care settings, this approach has been shown to improve shared decision making, patient-clinician relationship and health outcomes.[5, 6]

In perinatal care, important outcomes expressing quality of life and social participation can be detained from PROM and PREM, such as maternal depression, incontinence, and birth experience. PROM and PREM may differ greatly and may be independent of provider-reported outcomes, describing far-reaching effects on women's lives.[7, 8] Additionally, PROM and PREM may highlight important outcomes from the patient perspective that remained hidden when collecting provider-reported outcomes only. Therefore, implementation of standardised PROM and PREM, including the adaptation of individual care pathways based on individual outcomes, is essential to further personalize and improve quality of perinatal care from the patient perspective. The International Consortium for Health Outcomes Measurement (ICHOM) provided a set of patient-centred outcome measures for pregnancy and childbirth (PCB Set) for perinatal care containing both provider-reported and patient-reported outcomes.[9] Prior research in the Netherlands found this set to be acceptable and feasible for implementation by all important stakeholders including women.[10, 11]

1  
2  
3 However, little is known regarding women's experiences with completing the PROM and PREM and  
4  
5 receiving care based on their individual outcomes as part of routine perinatal care.  
6

7  
8 In the Netherlands, a nationwide implementation project was initiated to facilitate shared decision  
9  
10 making by implementing the PROM and PREM of the PCB Set in regular perinatal care. To achieve  
11  
12 successful implementation, identifying unanticipated influences, facilitators and barriers among the  
13  
14 users during the early implementation process of PROM and PREM is crucial.[12] Our pre-  
15  
16 implementation research identified women as important users next to perinatal care professionals.  
17  
18 [10, 11] Insights into first women's experiences with receiving personalised care based on their  
19  
20 individual PROM and PREM during pregnancy, childbirth and the postpartum period will enhance  
21  
22 and improve further implementation of PROM and PREM as part of routine perinatal care.  
23  
24

25 Therefore, alongside the nationwide implementation project, we conducted a mixed methods study  
26  
27 to gain insight into the experiences of women with completing and discussing PROM and PREM, and  
28  
29 tailoring their care based on their outcomes in a routine perinatal care setting.  
30  
31  
32  
33  
34  
35  
36  
37  
38  
39  
40  
41  
42  
43  
44  
45  
46  
47  
48  
49  
50  
51  
52  
53  
54  
55  
56  
57  
58  
59  
60

## METHODS

### Design

Mixed-method prospective cohort study to gain insight in women's experiences with using the PROM and PREM of the ICHOM PCB set for perinatal care in clinical practice among women receiving perinatal care.

### Setting

This study was conducted in seven obstetric care networks (OCNs) participating in a nationwide implementation project of the ICHOM PCB Set in the Netherlands. Alongside the implementation project in clinic, this study was performed to evaluate women's experiences with this innovation in routine care. The implementation project aimed integration of the PCB Set into routine perinatal care, i.e. that women were invited to complete PROMs and PREMs and discuss them with their care professional as part of routine perinatal care at five time points during their pregnancy or postpartum period. At these time points, different care professionals may have been responsible for the participants' health (see **Figure 1**). Women received an information leaflet regarding the purpose of the PROM and PREM before filling out their first PROM and PREM questionnaire and could complete the questionnaires digitally at home. Care professionals were informed about the content of the PCB Set (**Figure 2**) and how to interpret the results. Training on how to discuss the outcomes was available if needed. Care professionals discussed the results of the PROM and PREM during the next regular visit directly after each time point, also at six months postpartum. Implementation plans differed among the OCNs to enhance local implementation; OCNs collected PROM and PREM during at least one time point, this was not necessarily time point 1 (see **Table 1**).

**Figure 1** Time points for data collection (PROM and PREM) and involvement of different care professionals, according to current practice in the Netherlands.

*The blue dots indicate the five time points for data collection during pregnancy and postpartum. Above the timeline, the involved care professionals are shown. In this project, the outcomes of the PROMs and PREMs were discussed with an obstetric care professional during all time points.[9]*

**Figure 2** Pregnancy and childbirth Set as applied in the Netherlands: domains and moments to measure (adapted from Depla et al.[13]).

*The blue dots indicate the five time points for data collection during pregnancy and postpartum (see also Figure 1). The outcome domains are divided into patient-reported outcome measures (PROMs) and patient-reported experience measures (PREMs). Below, the number of questions of the total questionnaire (PROM and PREM) per time point is shown.*

**Table 1 Implementation of time points per obstetric care network**

|                                                 | OCN 1 | OCN 2 | OCN 3 | OCN 4 | OCN 5 | OCN 6 | OCN 7 |
|-------------------------------------------------|-------|-------|-------|-------|-------|-------|-------|
| Time point 1:<br>first visit                    |       |       | ✓     | ✓     | ✓     | ✓     |       |
| Time point 2:<br>28-32 weeks of<br>gestation    | ✓     | ✓     | ✓     | ✓     | ✓     | ✓     |       |
| Time point 3:<br>first days after<br>childbirth |       |       | ✓     | ✓     | ✓     | ✓     | ✓     |
| Time point 4:<br>postpartum<br>check-up         |       | ✓     | ✓     | ✓     | ✓     | ✓     | ✓     |
| Time point 5:<br>6 months<br>postpartum         |       |       |       |       | ✓     |       | ✓     |

#### Patient and Public Involvement statement

Simultaneously with the implementation of the PCB set, this study was conducted to gain insight into women's experiences with completing and discussing PROM and PREM. Both the clinical implementation project and this study were a continuation of previous projects that actively involved women as important stakeholders, resulting in changes into the Dutch PCB Set, as well as providing insight in facilitators and barriers to be addressed during the implementation of the PCB Set in routine care. In this study, we sent out a survey and conducted interviews with women. The study was designed in close collaboration with care professionals, while taking into account previous findings from surveys, interviews, and focus group interviews with women.[10, 11, 14] Also, the PROM and PREM questionnaires used in clinic were tested for comprehensiveness among four

1  
2  
3 women with low health literacy skills supported by Pharos, a national centre of expertise in  
4 decreasing health inequities.[15] Small language adaptations were made based on this test.  
5  
6  
7

### 8 9 Participants

10 As our study was conducted within a large implementation project of the PCB set, all women who  
11 received PROM and PREM questionnaires as part of their routine perinatal care in one of the  
12 participating OCNs were eligible for this study. Women were invited to participate in this study via a  
13 digital link immediately after filling out a PROM/PREM questionnaire at home. They were asked to  
14 complete a short evaluation survey and optionally participate in a telephone interview regarding  
15 their experiences with completing and discussing the PROM and PREM.  
16  
17  
18  
19  
20  
21  
22

23  
24 Inclusion criteria for this study were:

- 25 - women completed at least one questionnaire of the PCB set;
  - 26 - women were 16 years or older during the first data collection time point;
  - 27 - women gave their informed consent to use their answers for research.
- 28  
29  
30  
31  
32  
33  
34

### 35 Data collection

36 Data collection was performed from March 2020 up until September 2021. The researchers  
37 composed a short evaluation survey (Supplementary Table 1). This anonymous survey was offered to  
38 participants via a digital link directly after completing their PROM and PREM. One OCN collected this  
39 evaluation survey on paper. No case mix questions were asked to minimise response burden for  
40 women who had already completed the PROM and PREM questionnaire. Answers to this survey  
41 were not visible to care professionals. At the end of this evaluation survey, participants were asked  
42 to provide their telephone number for an in-depth evaluation interview by phone. First, all  
43 participants who provided their telephone number were approached for a semi-structured interview  
44 by one of the researchers (see for topic list **Table 2**). Further on, purposive sampling was performed,  
45 e.g., selecting women that had filled out PROM and PREM at time points 3, 4, and 5, or women who  
46 gave specific answers in the evaluation survey. Additionally, care professionals were asked to  
47  
48  
49  
50  
51  
52  
53  
54  
55  
56  
57  
58  
59  
60

1  
2  
3 actively recruit women with decreased health literacy skills for an interview by the researchers. Data  
4  
5 collection was ended as soon as thematic saturation was accomplished (see Data analysis). All  
6  
7 interviews were audio-recorded and transcribed verbatim.  
8  
9  
10  
11  
12  
13  
14  
15  
16  
17  
18  
19  
20  
21  
22  
23  
24  
25  
26  
27  
28  
29  
30  
31  
32  
33  
34  
35  
36  
37  
38  
39  
40  
41  
42  
43  
44  
45  
46  
47  
48  
49  
50  
51  
52  
53  
54  
55  
56  
57  
58  
59  
60

For peer review only



**Table 2 Topic list used for the interviews**

| Topics                                               | Sub topics                                                                                                                                                                                                                                                                                                                                                                                                  |
|------------------------------------------------------|-------------------------------------------------------------------------------------------------------------------------------------------------------------------------------------------------------------------------------------------------------------------------------------------------------------------------------------------------------------------------------------------------------------|
| Course pregnancy/childbirth                          | General Health / Experiences pregnancy                                                                                                                                                                                                                                                                                                                                                                      |
| Time spent on completing PROM and PREM - experiences | Experiences completing PROM and PREM<br>Experience on time spend<br>Motivation for completion of PROM and PREM<br>Reasons for (not) completing PROM and PREM in the future<br>Time point 1 & 2: thoughts regarding completing PROM and PREM multiple times during pregnancy and after childbirth<br>Time point 3-5: experiences with completing PROM and PREM after childbirth up until 6 months postpartum |
| Comprehensiveness PROM and PREM                      | Understanding PROM and PREM: language used, reason why PROM and PREM were asked, information provision<br>Social desirability<br>PREM regarding experiences with care providers: completing and discussing                                                                                                                                                                                                  |
| Discussing PROM and PREM with care professionals     | Experiences regarding discussing PROM and PREM<br>Adverse outcomes of PROM and PREM<br>Taboo topics<br>Bond with care professional<br>Unexpected outcomes<br>Resistance regarding discussing PROM and PREM<br>Advantages and gains of discussing PROM and PREM                                                                                                                                              |
| Improvements and suggestions                         | Results of evaluation survey<br>Previously completed PROM and PREM<br>Important topics                                                                                                                                                                                                                                                                                                                      |
| Preferred care provider                              | Time point<br>Outcomes that are discussed                                                                                                                                                                                                                                                                                                                                                                   |
| Shared decision making                               | Care pathway – participant’s influence<br>Discussing wishes and fears regarding pregnancy and childbirth<br>Patient – care professional relationship                                                                                                                                                                                                                                                        |

*PROM: patient reported outcome measures. PREM: patient reported experience measures*

### Data analysis

The quantitative data from the evaluation survey were analysed using descriptive statistics with SPSS version 25 (IBM Corp., Armonk, N.Y., USA). Free text answers were analysed with thematic analysis supported by Microsoft Excel (version 16). The transcriptions from the interviews were checked for accuracy with the original audiotapes by LL. The software program Atlas.ti 9 was used to support thematic inductive content analysis.[16] LL and SK independently coded the transcripts to create a set of preliminary codes and compared the codes to reach consensus. To detect emerging themes, we merged matching codes, and explored links between codes. An overview was constructed of themes and subthemes for women's experiences with completing and discussing PROM and PREM. This overview was compared with the free text answer analysis of the open-ended questions from the survey and combined into an integrated overview. The integrated overview was discussed with AD, ML and MB and subthemes were identified as facilitators and barriers. Reporting followed the Standards for Reporting Qualitative Research (SRQR).[17]

## RESULTS

### Survey

460 Participants (35%) filled out the patient evaluation survey from a total of 1318 women who completed at least one PROM and PREM questionnaire. Descriptive statistics of the survey are shown in Supplementary Table 2 and Supplementary Figure 1a-d. Regarding the time spent on completing the questionnaires, 87% of participants indicated this as 'good'. The comprehensiveness of the questions was indicated as 'good' by most participants (78%). The need to discuss the outcomes of the questionnaires with the care professional differed: of the participants 39% answered 'not really', and 35% 'a little', and 20% 'yes'. Of the participants that wanted to discuss the outcomes, the majority preferred their obstetric care professional for this. The answers from the open-ended questions are to be discussed below.

### Interviews

26 participants provided their telephone number for the interview, none of these participants had completed PROM and PREM during time point 3 (maternity week). 16 interviews were conducted. We interviewed two participants that completed PROM and PREM during time point 1 and 4, nine during time point 2, and three during time point 5. The average age of participants was 34 years [29-39 years] and the majority were higher educated (14 of 16), i.e., completed an education at a university or university of applied sciences. Four participants received perinatal care for the first time; they were pregnant for the first time or had given birth to their first child. Six participants had received perinatal care by a community midwife, five by a gynaecologist in the hospital, and five by both community midwives and gynaecologists.

## Themes

The facilitators and barriers identified from the open-ended questions and interviews were allocated to four overarching themes (see Table 3): 1. Content of the PROM and PREM, 2. Application of the outcomes of PROM and PREM in perinatal care, 3. Discussing PREM, and 4. Data capture tool. These themes including facilitators and barriers are described below in detail, with illustrative quotes.

### *1. Content of PROM and PREM questionnaires*

Most participants found the language of the PROM and PREM clear and understood the questions. Participants felt that the PROM and PREM covered most important topics and were of a good length. Most participants emphasised the importance of PROM and PREM addressing taboo topics, such as incontinence, depression, and pain with intercourse. In the interviews, participants shared that completing PROM and PREM on these topics created awareness about their current health status and potential problems during pregnancy, childbirth and first months postpartum (see Quote 1).

#### *Quote 1 Awareness of taboo topics:*

*[Complete PROM/PREM to prepare for their next visit] "I assume [advantages] for both parties: for yourself because you think about everything, also things you wouldn't consider at first. And I expect it [capturing PROM and PREM] would be helpful for a care professional as well, because he can ask further than just the topics a patient brings up at that moment." (T4)*

However, the language of some questions was too difficult, especially for lower educated women, and several PROMs were not specific in timing or location of physical complaints. This led to different interpretations of the questions. Regarding the content of the PREM, participants

1  
2  
3 experienced discrepancy between the timing of the questions and the care received. For example, at  
4  
5 time point 2, options for pain management during childbirth had often not been discussed yet, thus  
6  
7 participants answered negative to the PREM addressing this. Another issue mentioned by the  
8  
9 interview participants in relation to PREM, was that they often received care from multiple care  
10  
11 professionals. They stated that they had to average their experiences when completing the PREM.  
12  
13 Several participants reported that they missed the answer option “I don’t know (yet)” or “not  
14  
15 applicable” in some questions, and the possibility to explain their answers. Also, participants missed  
16  
17 the possibility in the questionnaires to point out important outcomes. This topic was expanded  
18  
19 during the interviews; participants wanted to be able to indicate outcomes important to discuss  
20  
21 during the following visit (see Quote 2).  
22  
23  
24  
25  
26  
27  
28

29 *Quote 2 No opportunity to explain answers or pointing out important topics*  
30 *[Opportunity for explanation during completion of PROM and PREM] “You should*  
31 *have a choice: whether you want to discuss it [your answers] or not, whether you*  
32 *want to be referred or not. [...] You could put it [an open text field] at the end of*  
33 *the questionnaire: ‘If you want consultation on this, if you have a top 3 or top 5 or*  
34 *something of the things that were just asked, what are the topics you would like*  
35 *to discuss with your midwife?’” (T2)*  
36  
37  
38  
39  
40  
41  
42  
43  
44  
45  
46  
47

48 Although most important topics were covered in the PROM and PREM, some participants stated that  
49  
50 there was too little attention for prevalent physical problems. They missed questions concerning  
51  
52 pelvic pain and haemorrhoids, especially at time point 2. Lastly, the timing of one specific topic was  
53  
54 debated by several participants: the PROM breastfeeding. At time point 2, this topic was  
55  
56 experienced as too early since most women did not know whether they intended to breastfeed and  
57  
58  
59  
60

1  
2  
3 could not properly answer the full questionnaire about self-efficacy. At time point 4, participants  
4  
5 indicated it felt too late to discuss problems with breastfeeding.  
6  
7  
8  
9

## 10 11 2. *Application of the outcomes of PROM and PREM in perinatal care*

12  
13  
14 Most participants indicated that filling out PROM and PREM helped them in preparing their next visit  
15  
16 to their obstetric care professional. They stated that thinking about the topics addressed by the  
17  
18 questionnaires made them know better what to expect from and to discuss in the following visit.  
19  
20 Interview participants also pointed out that the use of PROM and PREM led to discussion of topics  
21  
22 that previously were no part of the conversation with their care professional. Some participants  
23  
24 indicated that they were unaware of some topics being pregnancy related, such as psychological  
25  
26 problems. Furthermore, some participants from the interviews said that they felt their care was  
27  
28 personalised based on their individual outcomes, for example extra attention, information, or a  
29  
30 referral for specialised care (see Quote 3 and Quote 4).  
31  
32  
33  
34  
35  
36  
37

### 38 *Quote 3 Care is personalised based on individual outcomes*

39  
40 *“Then she [the care professional that discussed her outcomes with her] said she could*  
41  
42 *refer me to a clinic for pelvic problems if I wanted to. [...] I thought that was very good.*  
43  
44 *They directly did a follow-up and offered me sort of an option like ‘you could this’.” (T5)*  
45  
46  
47

### 48 *Quote 4 Care is personalised based on individual outcomes*

49  
50 *[her PROM answers indicated depressive symptoms] “Well... personally I think I, and*  
51  
52 *they too [care professionals], gave some extra attention to my mental health.” (T2)*  
53  
54  
55  
56  
57  
58  
59  
60

1  
2  
3 At time point 5, one participant from the interviews felt relieved that her care professional paid  
4 attention to her incontinence and psychological problems. She felt that otherwise she would not  
5 have had any care professional to discuss these issues with.  
6  
7

8  
9  
10 Despite the availability of an information leaflet and their care professionals' explanation, many  
11 participants had misunderstood the aim of the project. They thought it was a research project and  
12 that their answers would be used for research purposes only. This indicates that the information  
13 about the purpose of PROM and PREM for individual care was insufficient, which posed a major  
14 barrier to complete questionnaires multiple times (see Quote 5).  
15  
16  
17  
18  
19  
20  
21  
22  
23  
24

25 *Quote 5 Insufficient information on the aim personalised care based on PROM and*  
26 *PREM*

27  
28 *"It was not clear to me why it [PROM and PREM] was asked. And I also can't*  
29 *remember that it [PROM and PREM questionnaires] included an introduction text*  
30 *or something like that... maybe that was included you know... but for me it was not*  
31 *clear what they wanted to do with that information [her answers]" (T2)*  
32  
33  
34  
35  
36  
37  
38  
39

40 Furthermore, some participants stated it was uncertain when the outcomes of their questionnaire  
41 would be discussed with them; not all participants had their outcomes discussed during the first visit  
42 after completing the PROM and PREM. One participant said that her outcomes had never been  
43 discussed with her. Several participants mentioned that completing PROM and PREM gave them the  
44 feeling of 'impersonalised care', as if care professionals tried to avoid the conversation about these  
45 topics. Other interview participants felt unsure about how the outcomes of the PROM and PREM  
46 would impact the quality of care of their individual care pathway. For example, when filling out  
47 negative experiences regarding one specific care professional, they preferred to receive care from  
48 another care professional because of their negative experience. Some participants, from both the  
49  
50  
51  
52  
53  
54  
55  
56  
57  
58  
59  
60

1  
2  
3 survey and the interviews, felt that discontinuity in care professionals posed a barrier to discuss the  
4  
5 outcomes. They did not feel at ease discussing outcomes with a care professional they had never  
6  
7 met before (see Quote 6). Interview participants also did not always know which care professional  
8  
9 was responsible for their outcomes.  
10  
11  
12  
13  
14

15 *Quote 6 Discontinuity of care professional*

16  
17 *“Nothing really popped up [from her answers to the questionnaires], but if that would have*  
18  
19 *been the case than I think it is harder to discuss some topics with a person [care*  
20  
21 *professional] that I have never met. Especially because some of these topics are sensitive*  
22  
23 *and vulnerable.” (T1)*  
24  
25  
26  
27  
28

29 *3. Discussing PREM*

30  
31  
32 Participants stated that the PREM were an important facilitator for them to complete the PROM and  
33  
34 PREM. They stressed that they found it very important that care professionals in general have insight  
35  
36 in patients’ experiences with their provided care. Additionally, participants from the interviews  
37  
38 thought that the insight in individual PREM may lead to improved quality of individual care.  
39  
40 Especially participants that had completed PREM at time point 5 stated that the PREM were  
41  
42 important to complete and to discuss, because it helped them to process the pregnancy and  
43  
44 postpartum period (see Quote 7).  
45  
46  
47  
48  
49  
50

51 *Quote 7 Discussing PREM at time point 5 important for reflection on pregnancy and*  
52  
53 *childbirth*

54  
55 *[After completing the T5 questionnaire] “The fact that she [care professional] called back,*  
56  
57 *that she called back actually concerned, and just ... just was talking with me and*  
58  
59  
60



1  
2  
3 *explained things. That has really, also in my head, enormously helped to sort things out.*

4  
5 *[...] Yes, I really look back on that [childbirth and postpartum period] better now.” (T5)*

6  
7  
8  
9  
10 Additionally, analysis of aggregate PREM results may indicate improvement topics, according to the  
11 interview participants. At the same time, a barrier was identified in overlap; some participants  
12 received PREM and other evaluation questionnaires from their community midwives postpartum,  
13 and it was unclear for them whether these outcomes were also sent to their midwives. Ambiguous  
14 opinions were found regarding discussing PREM individually. Some participants, who were satisfied  
15 with the care they received, indicated they would have preferred addressing negative experiences  
16 directly with their care professional, instead of via PREM (see Quote 8). In contrast to participants  
17 that had had negative experiences: they explained it felt easier to indicate this via PREM instead of  
18 discussing it face to face with their care professional.  
19  
20  
21  
22  
23  
24  
25  
26  
27  
28  
29  
30  
31  
32  
33

34 *Quote 8 Negative PREM preferably face to face*

35 *[addressing care experiences with care professional] “I believe it is fairer when*  
36 *they [care professionals] hear it from me personally, but I can imagine that some*  
37 *people don’t feel comfortable with that and prefer to leave their feedback*  
38 *anonymously and that eventually it will reach the care professional anyway.” (T2)*  
39  
40  
41  
42  
43  
44  
45  
46  
47  
48  
49  
50  
51  
52  
53  
54  
55

56 Additionally, some participants stated to feel dependent of their care professional during their care  
57 pathway, which posed a barrier to report negative experiences in the PREM.  
58  
59  
60

#### 4. Data capture tool

1  
2  
3 Participants indicated that they preferred to complete PROM and PREM digitally. Completing the  
4  
5 PROM and PREM on mobile phones or tablets was preferred by most women. However, participants  
6  
7 pointed out technical issues as a major barrier; PROM and PREM questions and answers that were  
8  
9 not entirely visible on a mobile phone led to incomplete or incorrect outcomes according to some  
10  
11 women (see Quote 9).  
12  
13  
14  
15  
16

17 *Quote 9 Technical problems and bugs*

18  
19 *[Completing PROM and PREM] "On my smartphone I can't see all the questions.*

20  
21 *On the iPad, some answer options disappear, so I must check three times whether*  
22  
23 *my answers are completed correctly. For example, satisfaction is measured on a*  
24  
25 *scale from 1 to 4. But when I go to the next page and back, it appears to be a scale*  
26  
27 *from 1 to 10."* (T2)  
28  
29  
30  
31  
32

33 Also, some participants received PROM and PREM belonging to a different time point or received the  
34  
35 same PROM and PREM multiple times. Furthermore, several interviewed participants stated that it  
36  
37 was unclear which organization sent the invitation to complete the questionnaires and which care  
38  
39 professionals had access to their answers. This made them have doubts regarding privacy (see Quote  
40  
41 10).  
42  
43  
44  
45  
46  
47

48 *Quote 10 Privacy issues*

49  
50 *[Completing questions regarding incontinence, mental health, physical complaints]: "And*  
51  
52 *yes, those are questions of a kind that you would only complete honestly if you are*  
53  
54 *completely sure that you can trust that they will end up at the right person."* (T2)  
55  
56  
57  
58  
59  
60

1 **Table 3 Overarching themes and identified facilitators and barriers**

| Themes                                                   | Facilitators                                                                                                                                                                                                                                                                                                      | Barriers                                                                                                                                                                                                                                                                                                                                                                                          |
|----------------------------------------------------------|-------------------------------------------------------------------------------------------------------------------------------------------------------------------------------------------------------------------------------------------------------------------------------------------------------------------|---------------------------------------------------------------------------------------------------------------------------------------------------------------------------------------------------------------------------------------------------------------------------------------------------------------------------------------------------------------------------------------------------|
| <b>1. Content of PROM and PREM questionnaires</b>        | Clear language<br>PROM and PREM covering all important topics<br>Good length of questionnaires<br>Awareness of taboo topics                                                                                                                                                                                       | Language of some questions too difficult<br>Some PROM questions not specific in time or location<br>Discrepancy questions with care path and situation<br>Absence of answer option "I don't know (yet)" or "not applicable"<br>No opportunity to explain answers or pointing out important outcomes<br>Too little attention to physical problems (time point 2)<br>(Timing of) PROM breastfeeding |
| <b>2. Application of the outcomes in individual care</b> | Better preparation for next visit/appointment<br>Discussing topics that were not discussed before<br>Care is personalised based on individual outcomes<br>Discussing outcomes at Time point 5                                                                                                                     | Insufficient information on the aim personalised care based on PROM and PREM<br>Uncertainty when outcomes are discussed<br>Feeling of impersonalised care<br>Unsure of impact on individual quality of care<br>Discontinuity of care professional                                                                                                                                                 |
| <b>3. Discussing PREMs</b>                               | PREM being included in the questionnaires<br>Insight in individual PREM improves individual quality of care<br>Discussing PREM at Time point 5 important for reflection on pregnancy and childbirth<br>Analysis of aggregate PREM for care improvement<br>Completing PREM safer option in case of dissatisfaction | Receiving multiple questionnaires regarding experiences<br>Negative PREM preferably face to face<br>Dependency of care professional                                                                                                                                                                                                                                                               |
| <b>4. Data capture tool</b>                              | Completing questionnaires digitally<br>Availability on mobile phones or tablets                                                                                                                                                                                                                                   | Technical problems and bugs<br>Privacy issues                                                                                                                                                                                                                                                                                                                                                     |

2 *PROM: patient-reported outcome measures, PREM: patient-reported experience measures*

## 3 DISCUSSION

4 This mixed methods study provides insight into the first experiences of women with completing and  
5 discussing PROM and PREM at different time points during and after pregnancy as part of routine  
6 perinatal care. The evaluation survey results showed that the time spent on completing the PROM  
7 and PREM was acceptable, and their content was comprehensive. Most survey participants felt the  
8 need to discuss the outcomes. In the interviews, participants were mainly positive about discussing  
9 their individual PROM and PREM outcomes with their perinatal care professionals. Women's barriers  
10 and facilitators to complete and discuss PROM and PREM individually were identified in four  
11 overarching themes.

### 13 *Strengths and limitations*

14 A strength of this study was the prospective design, incorporated in an implementation project as  
15 part of regular care. Its results supported further implementation of the outcome set, as they were  
16 directly translated into adaptations in the clinical project, such as IT improvements and an option to  
17 further explain an answer. Accordingly, by providing PROMs and PREMs throughout pregnancy and  
18 the postpartum period, women can become aware of what high-quality care encompasses, and of  
19 complications or symptoms that can occur. This awareness can empower women and support them  
20 to adjust their care pathway to their individual preferences and values. Another strength was the  
21 large sample size of survey participants combined with semi-structured interviews to explore survey  
22 answers in-depth, which increased the generalizability of our results. Also, the participation  
23 threshold was lowered by conducting the survey anonymously and the interviews by telephone,  
24 limiting the risk of selection bias. However, despite our efforts to minimise the risk of selection bias  
25 with purposive sampling as well, mostly higher educated women were included, and only Dutch  
26 speaking women could participate to the surveys. This was inevitable to some extent, as the sample

1  
2  
3 27 was taken from an already selected population: women completing the PROM and PREM were Dutch  
4  
5 28 speaking only and had a relatively good health literacy, as no support was provided with completing  
6  
7 29 them. This limitation should be taken into account when interpreting our findings and stresses the  
8  
9  
10 30 importance of future efforts to engage all women when implementing PROM and PREM to prevent  
11  
12 31 further health inequities. Nevertheless, this exploration of patient experiences with individual PROM  
13  
14 32 and PREM was the first among women receiving perinatal care. A second limitation, resulting from  
15  
16 33 the outline of the implementation project, was the unequal representation of time points for PROM  
17  
18 34 and PREM collection in our interviews. Despite our strategy to ask care professionals to recruit  
19  
20 35 participants for the interviews directly, i.e., without filling out the survey, we could not interview  
21  
22  
23 36 women who had completed PROM and PREM at time point 3 (maternity week).  
24  
25  
26 37  
27  
28

### 29 38 *Compared with literature*

30  
31 39 In line with findings in other disciplines, discussing PROM and PREM with care professionals as part  
32  
33 40 of routine perinatal care was found to improve patient satisfaction and willingness to complete the  
34  
35 41 questionnaires.[6, 18-20] Participants felt better prepared for their next visit and discussed topics  
36  
37 42 that were not discussed before, which reconfirms results from large studies in chronic care  
38  
39 43 settings.[20-22] At the same time, a significant part of our survey respondents did not feel the need  
40  
41 44 to discuss their outcomes. Moreover, for some women completing the questionnaires even felt as  
42  
43 45 impersonalized care. As the survey was offered directly after completing the PROM and PREM,  
44  
45 46 survey participants had not yet discussed their outcomes with their care professional. These findings  
46  
47 47 indicate that discussing outcomes are an essential part of using PROM and PREM in clinical  
48  
49 48 practice.[6] Another explanation could be inadequate information provision, as several women  
50  
51 49 stated that the purpose of the PROM and PREM was unclear to them. As women's perception of this  
52  
53 50 purpose largely depends on their care professional, care professionals may improve this by actively  
54  
55  
56  
57  
58  
59  
60

1  
2  
3 51 using PROM and PREM as a part of routine care. For example, by encouraging women to consider  
4  
5 52 which outcomes they want to discuss in the next visit.  
6  
7  
8 53  
9  
10  
11 54 Using individual outcomes to tailor care was an important facilitator to complete PROM and PREM  
12  
13 55 over the course of pregnancy and postpartum. Nevertheless, two important barriers to use PROM  
14  
15 56 and PREM individually were raised by our participants as well. First, discrepancy between the  
16  
17 57 timelines of provided care and the PROM and PREM was pointed out. For example, a PREM  
18  
19 58 questioning information provision on pain relief was sent to women, before care professionals  
20  
21 59 addressed this topic according to standard care. Synchronising the time points of the PCB set with  
22  
23 60 routine perinatal care pathways may solve this barrier. Based on compliance to the PROM and PREM  
24  
25 61 and results of the PROM and PREM, concrete recommendations to adapt the PCB set's content and  
26  
27 62 timeline have been suggested in a recent publication, and are in accordance with women's  
28  
29 63 experiences found in this study. [13] Secondly, discontinuity in care professional was posed as a  
30  
31 64 barrier, as discussing PROM and PREM with different care professionals lead to discomfort among  
32  
33 65 participants. Discussing outcomes in the multidisciplinary setting of perinatal care may be easier if a  
34  
35 66 principal care professional is allocated to every pregnant woman. A relationship of trust between  
36  
37 67 care professional and patients may be a crucial facilitator for completing and discussing PROM and  
38  
39 68 PREM, especially when discussing taboo topics such as incontinence.[23] This may provide  
40  
41 69 opportunity to improve perinatal care outcomes, as several taboo topics have been shown highly  
42  
43 70 prevalent and only 15% of the affected women bring them up during a postpartum check-up.[13, 24]  
44  
45 71 Additionally, although hard to accomplish by perinatal care professionals, our participants stated that  
46  
47 72 evaluating their outcomes at six months postpartum with a perinatal care professional was of added  
48  
49 73 value to the regular postpartum check-up. This reconfirms previously reported patient views  
50  
51 74 regarding time point five of the PCB set.[10, 11] Compared to the check-up at six weeks postpartum,  
52  
53 75 at six months postpartum most women have further recovered in multiple domains and resumed  
54  
55  
56  
57  
58  
59  
60

1  
2  
3 76 their work and social life. Hence, at this moment, the sustainability and severity of physical or mental  
4  
5 77 problems can be determined and referred for, improving long-term outcomes of perinatal care.  
6  
7

8 78  
9  
10 79 Confirming pre-implementation studies, our participants emphasized that PREM were an important  
11  
12 80 facilitator to complete the questionnaires.[10, 11] However, evidence on individual PREM use as part  
13  
14 81 of clinical practice is scarce. This study revealed different opinions amongst women: some preferred  
15  
16 82 to address negative experiences face to face, some felt PREM made it easier to raise and others felt  
17  
18 83 too dependent on their care professional to discuss a negative experience at all. Future research  
19  
20 84 should evaluate the possible effects of offering each woman a choice whether her individual answers  
21  
22 85 are visible to care professionals and discussed as part of her care.  
23  
24  
25  
26  
27 86

28  
29 87 As shown before from a professional perspective, a good functioning data capture tool for  
30  
31 88 assessment and real-life visualisation of patient reported measures is essential for successful  
32  
33 89 implementation.[6, 25, 26] In our patient evaluation, technological issues of the data capture tools  
34  
35 90 were also a major barrier for completing the questionnaires. Although challenging in terms of inter-  
36  
37 91 organisational collaboration and IT infrastructure, this project was one of the first to attempt system  
38  
39 92 wide implementation of PROM and PREM as a standard part of individual perinatal care to guide  
40  
41 93 individual care and personalised care pathways. In the transformation towards health care systems  
42  
43 94 that provide patient-centred care over the full cycle of care, it is essential to use data capture tools  
44  
45 95 that facilitate information exchange between all health care tiers involved with a disease or  
46  
47 96 condition.  
48  
49  
50  
51

52 97

53  
54  
55 98 *Future research and implications*  
56  
57  
58  
59  
60

1  
2  
3 99 To achieve personalized care based on PROM and PREM, patient engagement is essential but  
4  
5 100 requires efforts at several points. For successful implementation, women will benefit from a system-  
6  
7 101 wide data capture tool, a principal care professional to discuss their outcomes with and a timeline of  
8  
9 102 PROM and PREM collection that fits clinical care: matching their appointments and content of care  
10  
11 103 pathways. Also, an open text field to explain answers and point out outcomes they want to discuss  
12  
13 104 could empower women to take an active role in their care. Lastly, when completing PROM and  
14  
15 105 PREM, women should be clearly informed about 1) the purpose of using their answers for  
16  
17 106 personalized care and 2) the topics addressed by the questionnaires at each time point and their  
18  
19 107 relation to pregnancy and childbirth. Since care professionals are crucial in providing this information  
20  
21 108 and in discussing the outcomes, future research may focus on the experiences of care professionals  
22  
23 109 with PROM and PREM use in perinatal care. To engage care professionals, it would be useful to  
24  
25 110 evaluate training strategies, but also their perceived benefits when working with PROM and PREM.  
26  
27 111 These could include direct improvement of individual care for their patients, as well as insight in the  
28  
29 112 results of their efforts in terms of patient outcomes.[14]  
30  
31  
32  
33  
34  
35  
36  
37

### 38 114 *Conclusions*

39  
40  
41 115 This study reported the first patient experiences with completing and discussing PROM and PREM as  
42  
43 116 part of perinatal care. The ICHOM PCB set was found to be an acceptable and useful instrument for  
44  
45 117 symptom detection and personalized perinatal care up until 6 months postpartum. Women's  
46  
47 118 reflections on these PROM and PREM allow several improvements of the content of the  
48  
49 119 questionnaires, the role of care professionals and congruity with routine care pathways.  
50  
51  
52  
53  
54  
55  
56  
57  
58  
59  
60



## 120 Acknowledgements

121 We acknowledge the women participating in this study. We thank the participating care  
122 professionals for approaching women and for discussing the PROMs and PREMs.

## 124 Funding statement:

125 This work was supported by Zorginstituut Nederland (ZIN) grant number 2018026697.

## 126 Competing interests statement:

127 AF and ML were chair and member respectively of the ICHOM working group that developed the PCB  
128 standard outcome set. The other authors have nothing to declare.

## 130 Contributorship statement:

131 AF, HE, JH, and MB led the overall implementation project in practice and established its funding.  
132 Collaborators of the BUZZ team led local implementation and recruited study participants. This study  
133 was designed by LL, AD, and MLdR under supervision of AF, HE and MB. LL and SK performed the  
134 interviews for data collection and analysed the data under supervision of MB. LL, AD, and MB  
135 interpreted the data. LL and AD wrote the first version of the manuscript and made adaptations after  
136 feedback of the other authors under supervision of MB. MB, AF, JH, HE, MLdR, SK, and the BUZZ  
137 team reviewed the manuscript and approved the final version. MB is the guarantor for the final  
138 product.

139

## 140 Details of Ethics Approval

141 The Medical Ethics Committee Erasmus Medical Centre (MEC-2020-0129) declared that the rules laid  
142 down in the Medical Research Involving Human Subjects Act (also known as WMO) do not apply to  
143 this study. This study was exempt from formal medical ethical assessment. Local approval of the  
144 regional ethical boards was obtained in each participating OCN. All participants signed written  
145 informed consent.

## 147 Data availability statement

148 Data are available upon reasonable request.

For peer review only

149 **References**

- 150 1. Porter ME, Teisberg EO. Redefining health care: creating value-based competition on results:  
151 Harvard Business Press; 2006.
- 152 2. Gliklich RD, NA, Leavy M. Registries for Evaluating Patient Outcomes: A User's Guide  
153 [Internet]. 3 ed 2014 Apr 2014.
- 154 3. U.S. Department of Health Services Human F.D.A. Center for Drug Evaluation Research, U.S.  
155 Department of Health Human Services F.D.A. Center for Biologics Evaluation Research, U.S.  
156 Department of Health Human Services F.D.A. Center for Devices Radiological Health, Guidance for  
157 Industry: Patient-Reported Outcome Measures: Use in Medical Product Development to Support  
158 Labeling Claims: Draft Guidance. *Health Qual Life Outcomes*, 4(2006) , pp. 79.
- 159 4. Basch E. Patient-reported outcomes—harnessing patients' voices to improve clinical care.  
160 *New England Journal of Medicine*. 2017;376(2):105-8.
- 161 5. Basch E, Barbera L, Kerrigan CL, Velikova G. Implementation of patient-reported outcomes in  
162 routine medical care. *American Society of Clinical Oncology Educational Book*. 2018;38:122-34.
- 163 6. van Egdom LSE, Oemrawsingh A, Verweij LM, Lingsma HF, Koppert LB, Verhoef C, et al.  
164 Implementing patient-reported outcome measures in clinical breast cancer care: a systematic review.  
165 *Value in Health*. 2019;22(10):1197-226.
- 166 7. Martin CJH, Martin CR. Development and psychometric properties of the Birth Satisfaction  
167 Scale-Revised (BSS-R). *Midwifery*. 2014;30(6):610-9.
- 168 8. Mason L, Glenn S, Walton I, Appleton C. The experience of stress incontinence after  
169 childbirth. *Birth*. 1999;26(3):164-71.
- 170 9. Nijagal MA, Wissig S, Stowell C, Olson E, Amer-Wahlin I, Bonsel G, et al. Standardized  
171 outcome measures for pregnancy and childbirth, an ICHOM proposal. *BMC Health Serv Res*.  
172 2018;18(1):953.
- 173 10. Depla AL, Ernst-Smelt HE, Poels M, Crombag NM, Franx A, Bekker MN. A feasibility study of  
174 implementing a patient-centered outcome set for pregnancy and childbirth. *Health Sci Rep*.  
175 2020;3(3):e168.
- 176 11. Laureij LT, Been JV, Lugtenberg M, Ernst-Smelt HE, Franx A, Hazelzet JA, et al. Exploring the  
177 applicability of the pregnancy and childbirth outcome set: A mixed methods study. *Patient Educ*  
178 *Couns*. 2019.
- 179 12. Damschroder LJ, Aron DC, Keith RE, Kirsh SR, Alexander JA, Lowery JC. Fostering  
180 implementation of health services research findings into practice: a consolidated framework for  
181 advancing implementation science. *Implement Sci*. 2009;4:50.
- 182 13. Depla AL, Lamain-de Ruiten M, Laureij LT, Ernst-Smelt HE, Hazelzet JA, Franx A, et al. Patient-  
183 Reported Outcome and Experience Measures in Perinatal Care to Guide Clinical Practice: Prospective  
184 Observational Study. *Journal of Medical Internet Research*. 2022;24(7):e37725.
- 185 14. Depla AL, Crombag NM, Franx A, Bekker MN. Implementation of a standard outcome set in  
186 perinatal care: a qualitative analysis of barriers and facilitators from all stakeholder perspectives.  
187 *BMC Health Serv Res*. 2021;21(1):113.
- 188 15. Pharos. Pharos 2022 [Available from: <https://www.pharos.nl/>].
- 189 16. Green J, Thorogood N. *Qualitative methods for health research*: Sage; 2018.
- 190 17. O'Brien BC, Harris IB, Beckman TJ, Reed DA, Cook DA. Standards for reporting qualitative  
191 research: a synthesis of recommendations. *Acad Med*. 2014;89(9):1245-51.
- 192 18. Chen J, Ou L, Hollis SJ. A systematic review of the impact of routine collection of patient  
193 reported outcome measures on patients, providers and health organisations in an oncologic setting.  
194 *BMC health services research*. 2013;13(1):1-24.
- 195 19. Basch E, Deal AM, Dueck AC, Scher HI, Kris MG, Hudis C, et al. Overall Survival Results of a  
196 Trial Assessing Patient-Reported Outcomes for Symptom Monitoring During Routine Cancer  
197 Treatment. *Jama*. 2017;318(2):197-8.
- 198 20. Lapin BR, Honomichl R, Thompson N, Rose S, Abelson A, Deal C, et al. Patient-reported  
199 experience with patient-reported outcome measures in adult patients seen in rheumatology clinics.  
200 *Qual Life Res*. 2021;30(4):1073-82.

- 1  
2  
3 201 21. Lapin B, Udeh B, Bautista JF, Katzan IL. Patient experience with patient-reported outcome  
4 202 measures in neurologic practice. *Neurology*. 2018;91(12):e1135-e51.  
5 203 22. van der Horst C. Personalized Health Care for Orofacial Cleft Patients. In: van Weert N,  
6 204 Hazelzet J, editors. *Personalized Specialty Care: Value-Based Healthcare Frontrunners from the*  
7 205 *Netherlands*. Cham: Springer International Publishing; 2021. p. 41-7.  
8 206 23. Oemrawsingh A, Hazelzet J, Koppert L. The State of Patient-Centered Breast Cancer Care: An  
9 207 Academic Center's Experience and Perspective. *Personalized Specialty Care*: Springer; 2021. p. 127-  
10 208 35.  
11 209 24. Schütze S, Hohlfeld B, Friedl TWP, Otto S, Kraft K, Hancke K, et al. Fishing for (in) continence:  
12 210 long-term follow-up of women with OASIS—still a taboo. *Archives of Gynecology and Obstetrics*.  
13 211 2021;303(4):987-97.  
14 212 25. Foster A, Croot L, Brazier J, Harris J, O’Cathain A. The facilitators and barriers to  
15 213 implementing patient reported outcome measures in organisations delivering health related  
16 214 services: a systematic review of reviews. *Journal of patient-reported outcomes*. 2018;2(1):1-16.  
17 215 26. Arora J, Haj M. Implementing ICHOM's standard sets of outcomes: cleft lip and palate at  
18 216 Erasmus University Medical Centre in the Netherlands. *International Consortium for Health*  
19 217 *Outcomes Measurement (ICHOM)*, London. 2016.

218

219



**Figure 1** Time points for data collection (PROM and PREM) and involvement of different care professionals, according to current practice in the Netherlands.

*The blue dots indicate the five time points for data collection during pregnancy and postpartum. Above the timeline, the involved care professionals are shown. In this project, the outcomes of the PROMs and PREMs were discussed with an obstetric care professional during all time points. [7]*

|                                                                     | 1                                        | 2                                                        | 3                           | 4                                                  | 5                      |      |
|---------------------------------------------------------------------|------------------------------------------|----------------------------------------------------------|-----------------------------|----------------------------------------------------|------------------------|------|
|                                                                     | 1 <sup>st</sup> trimester<br>First visit | 3 <sup>rd</sup> trimester<br>28-32 weeks<br>of gestation | after birth<br>(first days) | Postpartum<br>check-up (~6<br>weeks<br>postpartum) | 6 months<br>postpartum |      |
| <b>Outcome Domain</b>                                               |                                          |                                                          |                             |                                                    |                        |      |
| Social support                                                      |                                          |                                                          |                             |                                                    |                        | PROM |
| Health related quality of life                                      |                                          |                                                          |                             |                                                    |                        |      |
| Mental health                                                       |                                          |                                                          |                             |                                                    |                        |      |
| Incontinence                                                        |                                          |                                                          |                             |                                                    |                        |      |
| Pain with intercourse                                               |                                          |                                                          |                             |                                                    |                        |      |
| Breastfeeding intention/success                                     |                                          |                                                          |                             |                                                    |                        |      |
| Breastfeeding confidence                                            |                                          |                                                          |                             |                                                    |                        |      |
| Mother-child bonding                                                |                                          |                                                          |                             |                                                    |                        |      |
| Confidence with role as mother                                      |                                          |                                                          |                             |                                                    |                        |      |
| Satisfaction with results of care                                   |                                          |                                                          |                             |                                                    |                        | PREM |
| Healthcare responsiveness                                           |                                          |                                                          |                             |                                                    |                        |      |
| Birth experience                                                    |                                          |                                                          |                             |                                                    |                        |      |
| Pain relief (Dutch addition)                                        |                                          |                                                          |                             |                                                    |                        |      |
| Role partner (Dutch addition)                                       |                                          |                                                          |                             |                                                    |                        |      |
| Continuity of care (Dutch addition)                                 |                                          |                                                          |                             |                                                    |                        |      |
| Number of questions (min-max)<br>dependent on screening question(s) | 18 – 37                                  | 30 – 64                                                  | 9 – 24                      | 50 – 84                                            | 27 – 46                |      |

**Figure 2** Pregnancy and childbirth Set as applied in the Netherlands: domains and moments to measure (adapted from Depla et al.[13]).

The blue dots indicate the five time points for data collection during pregnancy and postpartum (see also Figure 1). The outcome domains are divided into patient-reported outcome measures (PROMs) and patient-reported experience measures (PREMs). Below, the number of questions of the total questionnaire (PROM and PREM) per time point is shown.

**Supplementary Table 1 Evaluation survey**

|                                                                      |          |
|----------------------------------------------------------------------|----------|
| <b>Q1) I found the time needed to complete the PROM and PREM ...</b> |          |
| <input type="checkbox"/>                                             | Too much |
| <input type="checkbox"/>                                             | A lot    |
| <input type="checkbox"/>                                             | Good     |
| <input type="checkbox"/>                                             | Short    |

|                                                                  |                                        |
|------------------------------------------------------------------|----------------------------------------|
| <b>Q2) Were you able to properly complete all PROM and PREM?</b> |                                        |
| <input type="checkbox"/>                                         | Yes                                    |
| <input type="checkbox"/>                                         | No, I did not understand all questions |
| <input type="checkbox"/>                                         | No, the questions were too personal    |
| <input type="checkbox"/>                                         | Other: .....                           |

|                                                                                                                                                            |                          |                                      |
|------------------------------------------------------------------------------------------------------------------------------------------------------------|--------------------------|--------------------------------------|
| <b>Q3) During the next visit, you will discuss the outcomes of the PROM and PREM with you care provider. Do you feel the need to discuss the outcomes?</b> |                          |                                      |
| <input type="checkbox"/>                                                                                                                                   | Yes                      | → Go to question 3b                  |
| <input type="checkbox"/>                                                                                                                                   | A little                 | → Go to question 3b                  |
| <input type="checkbox"/>                                                                                                                                   | Not really               | → Go to question 3c                  |
| <input type="checkbox"/>                                                                                                                                   | Not at all               | → Go to question 3c                  |
| <b>Q3b) Who do you prefer to discuss your outcomes with?</b>                                                                                               | <input type="checkbox"/> | Community midwife                    |
|                                                                                                                                                            | <input type="checkbox"/> | Clinical midwife                     |
|                                                                                                                                                            | <input type="checkbox"/> | Gynaecologist                        |
|                                                                                                                                                            | <input type="checkbox"/> | Maternity care assistant or nurse    |
|                                                                                                                                                            | <input type="checkbox"/> | Preventive Child Healthcare services |
|                                                                                                                                                            | <input type="checkbox"/> | General practitioner                 |
| <b>Q3c) Can you please explain why you do not prefer to discuss your outcomes?</b>                                                                         | <input type="checkbox"/> | No preference                        |
|                                                                                                                                                            | <input type="checkbox"/> | .....                                |
|                                                                                                                                                            | <input type="checkbox"/> | .....                                |
|                                                                                                                                                            | <input type="checkbox"/> | .....                                |

|                                                                                                |       |
|------------------------------------------------------------------------------------------------|-------|
| <b>Q4) Do you have any remarks regarding the PROM and PREM or suggestions for improvement?</b> |       |
| <input type="checkbox"/>                                                                       | ..... |
| <input type="checkbox"/>                                                                       | ..... |
| <input type="checkbox"/>                                                                       | ..... |

|                                                                                 |                                    |
|---------------------------------------------------------------------------------|------------------------------------|
| <b>Q5) Do you give permission for an evaluation by telephone in the future?</b> |                                    |
| <input type="checkbox"/>                                                        | Yes, my telephone number is: ..... |
| <input type="checkbox"/>                                                        | No                                 |

*PROM: patient reported outcome measures. PREM: patient reported experience measures*

1  
2  
3  
4  
5  
6  
7  
8  
9  
10  
11  
12  
13  
14  
15  
16  
17  
18  
19  
20  
21  
22  
23  
24  
25  
26  
27  
28  
29  
30  
31  
32  
33  
34  
35  
36  
37  
38  
39  
40  
41  
42  
43  
44  
45  
46  
47  
48  
49  
50  
51  
52  
53  
54  
55  
56  
57  
58  
59  
60

**Supplementary Table 2 Survey participants per time point**

| <b>Time point</b> | <b>n</b>   |
|-------------------|------------|
| <b>T1</b>         | 93         |
| <b>T2</b>         | 337        |
| <b>T3</b>         | 10         |
| <b>T4</b>         | 9          |
| <b>T5</b>         | 11         |
| <b>Total</b>      | <b>460</b> |

For peer review only



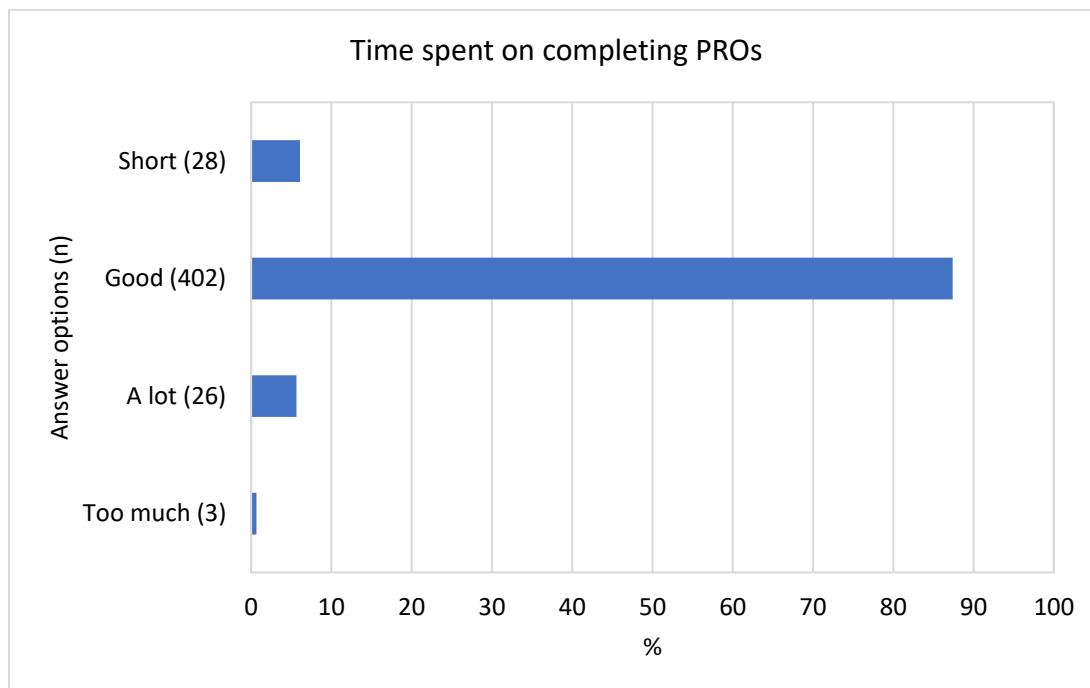

**Supplementary Figure 1a** Q1 I found the time needed to complete the PROM and PREM...

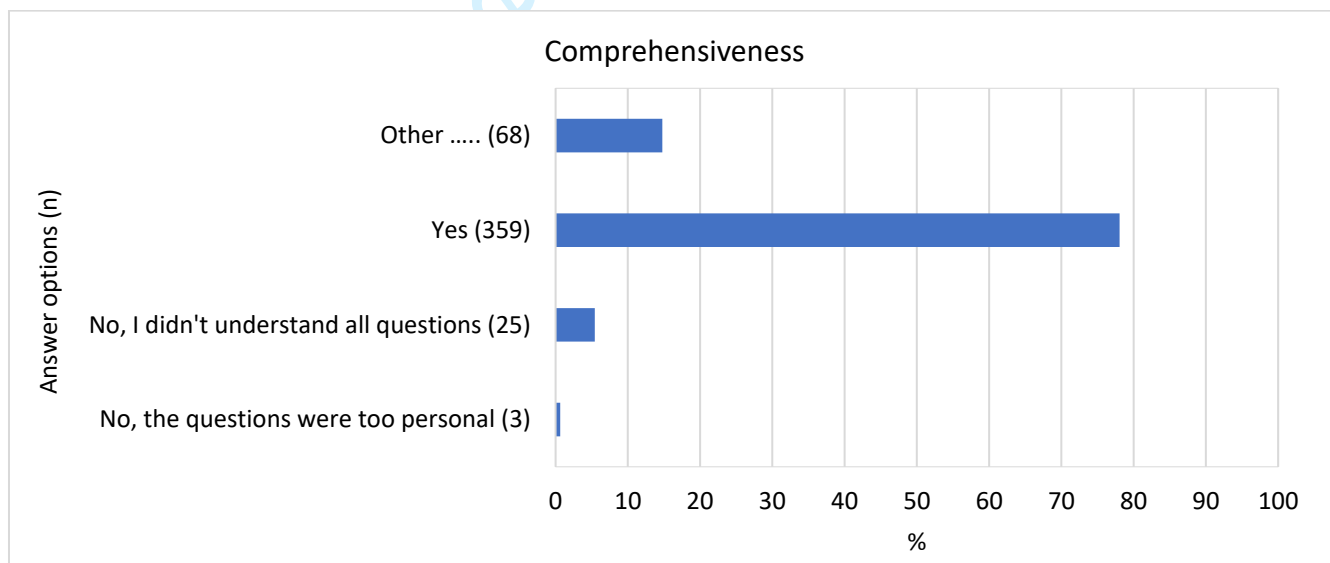

**Supplementary Figure 1b** Q2 Were you able to properly complete all PROM and PREM?



25 **Supplementary Figure 1c** Q3 During the next visit, you will discuss the outcomes of the PROM and  
26 PREM with you care provider. Do you feel the need to discuss the outcomes?  
27



48 **Supplementary Figure 1d** Q3b Who do you prefer to discuss your outcomes with?  
49  
50  
51  
52  
53  
54  
55  
56  
57  
58  
59  
60

## Standards for Reporting Qualitative Research (SRQR)\*

<http://www.equator-network.org/reporting-guidelines/srqr/>

Page/line no(s).

### Title and abstract

|                                                                                                                                                                                                                                                              |        |
|--------------------------------------------------------------------------------------------------------------------------------------------------------------------------------------------------------------------------------------------------------------|--------|
| <p><b>Title</b> - Concise description of the nature and topic of the study Identifying the study as qualitative or indicating the approach (e.g., ethnography, grounded theory) or data collection methods (e.g., interview, focus group) is recommended</p> | 1/ 1-2 |
| <p><b>Abstract</b> - Summary of key elements of the study using the abstract format of the intended publication; typically includes background, purpose, methods, results, and conclusions</p>                                                               | 2-3    |

### Introduction

|                                                                                                                                                                     |             |
|---------------------------------------------------------------------------------------------------------------------------------------------------------------------|-------------|
| <p><b>Problem formulation</b> - Description and significance of the problem/phenomenon studied; review of relevant theory and empirical work; problem statement</p> | 4-5/117-126 |
| <p><b>Purpose or research question</b> - Purpose of the study and specific objectives or questions</p>                                                              | 5/124-126   |

### Methods

|                                                                                                                                                                                                                                                                                                                                                                                                             |                        |
|-------------------------------------------------------------------------------------------------------------------------------------------------------------------------------------------------------------------------------------------------------------------------------------------------------------------------------------------------------------------------------------------------------------|------------------------|
| <p><b>Qualitative approach and research paradigm</b> - Qualitative approach (e.g., ethnography, grounded theory, case study, phenomenology, narrative research) and guiding theory if appropriate; identifying the research paradigm (e.g., postpositivist, constructivist/ interpretivist) is also recommended; rationale**</p>                                                                            | 6, 129-130             |
| <p><b>Researcher characteristics and reflexivity</b> - Researchers' characteristics that may influence the research, including personal attributes, qualifications/experience, relationship with participants, assumptions, and/or presuppositions; potential or actual interaction between researchers' characteristics and the research questions, approach, methods, results, and/or transferability</p> | 10/187-199             |
| <p><b>Context</b> - Setting/site and salient contextual factors; rationale**</p>                                                                                                                                                                                                                                                                                                                            | 7/160-166<br>8/176-179 |
| <p><b>Sampling strategy</b> - How and why research participants, documents, or events were selected; criteria for deciding when no further sampling was necessary (e.g., sampling saturation); rationale**</p>                                                                                                                                                                                              | 8/159-170<br>8/177-184 |
| <p><b>Ethical issues pertaining to human subjects</b> - Documentation of approval by an appropriate ethics review board and participant consent, or explanation for lack thereof; other confidentiality and data security issues</p>                                                                                                                                                                        | 25/466-471             |
| <p><b>Data collection methods</b> - Types of data collected; details of data collection procedures including (as appropriate) start and stop dates of data collection and analysis, iterative process, triangulation of sources/methods, and modification of procedures in response to evolving study findings; rationale**</p>                                                                             | 6/134-135<br>8/172-184 |

|                       |                                                                                                                                                                                                                                                       |                                      |
|-----------------------|-------------------------------------------------------------------------------------------------------------------------------------------------------------------------------------------------------------------------------------------------------|--------------------------------------|
| 1<br>2<br>3<br>4<br>5 | <b>Data collection instruments and technologies</b> - Description of instruments (e.g., interview guides, questionnaires) and devices (e.g., audio recorders) used for data collection; if/how the instrument(s) changed over the course of the study | 7/176-179, 183-184                   |
| 6<br>7<br>8           | <b>Units of study</b> - Number and relevant characteristics of participants, documents, or events included in the study; level of participation (could be reported in results)                                                                        | 11/213-222                           |
| 9<br>10<br>11<br>12   | <b>Data processing</b> - Methods for processing data prior to and during analysis, including transcription, data entry, data management and security, verification of data integrity, data coding, and anonymization/de-identification of excerpts    | 10/188-192                           |
| 13<br>14<br>15<br>16  | <b>Data analysis</b> - Process by which inferences, themes, etc., were identified and developed, including the researchers involved in data analysis; usually references a specific paradigm or approach; rationale**                                 | 10/187-199                           |
| 17<br>18<br>19<br>20  | <b>Techniques to enhance trustworthiness</b> - Techniques to enhance trustworthiness and credibility of data analysis (e.g., member checking, audit trail, triangulation); rationale**                                                                | 6, 129-130<br>10/192-193,<br>197-198 |

### Results/findings

|                      |                                                                                                                                                                                                   |                           |
|----------------------|---------------------------------------------------------------------------------------------------------------------------------------------------------------------------------------------------|---------------------------|
| 23<br>24<br>25<br>26 | <b>Synthesis and interpretation</b> - Main findings (e.g., interpretations, inferences, and themes); might include development of a theory or model, or integration with prior research or theory | 11-12/224-228,<br>Table 2 |
| 27<br>28<br>29       | <b>Links to empirical data</b> - Evidence (e.g., quotes, field notes, text excerpts, photographs) to substantiate analytic findings                                                               | Quote 1-10                |

### Discussion

|                                  |                                                                                                                                                                                                                                                                                                                                                                                                             |                           |
|----------------------------------|-------------------------------------------------------------------------------------------------------------------------------------------------------------------------------------------------------------------------------------------------------------------------------------------------------------------------------------------------------------------------------------------------------------|---------------------------|
| 32<br>33<br>34<br>35<br>36<br>37 | <b>Integration with prior work, implications, transferability, and contribution(s) to the field</b> - Short summary of main findings; explanation of how findings and conclusions connect to, support, elaborate on, or challenge conclusions of earlier scholarship; discussion of scope of application/generalizability; identification of unique contribution(s) to scholarship in a discipline or field | 20/342-349, 21-23/371-424 |
| 38<br>39                         | <b>Limitations</b> - Trustworthiness and limitations of findings                                                                                                                                                                                                                                                                                                                                            | 20/ 351-368               |

### Other

|                |                                                                                                                                               |            |
|----------------|-----------------------------------------------------------------------------------------------------------------------------------------------|------------|
| 42<br>43<br>44 | <b>Conflicts of interest</b> - Potential sources of influence or perceived influence on study conduct and conclusions; how these were managed | 24/454-456 |
| 45<br>46       | <b>Funding</b> - Sources of funding and other support; role of funders in data collection, interpretation, and reporting                      | 24/452-453 |

\*The authors created the SRQR by searching the literature to identify guidelines, reporting standards, and critical appraisal criteria for qualitative research; reviewing the reference lists of retrieved sources; and contacting experts to gain feedback. The SRQR aims to improve the transparency of all aspects of qualitative research by providing clear standards for reporting qualitative research.

1  
2  
3  
4  
5  
6  
7  
8  
9  
10  
11  
12  
13  
14  
15  
16  
17  
18  
19  
20  
21  
22  
23  
24  
25  
26  
27  
28  
29  
30  
31  
32  
33  
34  
35  
36  
37  
38  
39  
40  
41  
42  
43  
44  
45  
46  
47  
48  
49  
50  
51  
52  
53  
54  
55  
56  
57  
58  
59  
60

\*\*The rationale should briefly discuss the justification for choosing that theory, approach, method, or technique rather than other options available, the assumptions and limitations implicit in those choices, and how those choices influence study conclusions and transferability. As appropriate, the rationale for several items might be discussed together.

**Reference:**

O'Brien BC, Harris IB, Beckman TJ, Reed DA, Cook DA. **Standards for reporting qualitative research: a synthesis of recommendations.** *Academic Medicine*, Vol. 89, No. 9 / Sept 2014  
DOI: 10.1097/ACM.0000000000000388

For peer review only

# BMJ Open

## Women's experiences with using patient-reported outcome and experience measures in routine perinatal care in the Netherlands: a mixed methods study

|                                 |                                                                                                                                                                                                                                                                                                                                                                                                                                                                                                                                                                    |
|---------------------------------|--------------------------------------------------------------------------------------------------------------------------------------------------------------------------------------------------------------------------------------------------------------------------------------------------------------------------------------------------------------------------------------------------------------------------------------------------------------------------------------------------------------------------------------------------------------------|
| Journal:                        | <i>BMJ Open</i>                                                                                                                                                                                                                                                                                                                                                                                                                                                                                                                                                    |
| Manuscript ID                   | bmjopen-2022-064452.R2                                                                                                                                                                                                                                                                                                                                                                                                                                                                                                                                             |
| Article Type:                   | Original research                                                                                                                                                                                                                                                                                                                                                                                                                                                                                                                                                  |
| Date Submitted by the Author:   | 09-Nov-2022                                                                                                                                                                                                                                                                                                                                                                                                                                                                                                                                                        |
| Complete List of Authors:       | Laureij, Lyzette; Erasmus MC, Obstetrics and Gynaecology<br>Depla, Anne; UMC Utrecht<br>Kariman, Shariva; UMC Utrecht, Department of Obstetrics and Gynaecology<br>Lamain-de Ruiters, Marije; Erasmus MC, Department of Obstetrics and Gynaecology; UMC Utrecht, Department of Obstetrics and Gynaecology<br>Ernst -Smelt, Hiske; Erasmus MC, Department of Obstetrics and Gynaecology<br>Hazelzet, Jan; Erasmus MC, Department of Public Health<br>Franx, Arie; Erasmus MC, Obstetrics and Gynaecology<br>Bekker, Mireille; UMC Utrecht<br>Team, Buzz; Erasmus MC |
| <b>Primary Subject Heading</b>: | Obstetrics and gynaecology                                                                                                                                                                                                                                                                                                                                                                                                                                                                                                                                         |
| Secondary Subject Heading:      | Qualitative research, Health services research                                                                                                                                                                                                                                                                                                                                                                                                                                                                                                                     |
| Keywords:                       | OBSTETRICS, QUALITATIVE RESEARCH, PRIMARY CARE                                                                                                                                                                                                                                                                                                                                                                                                                                                                                                                     |
|                                 |                                                                                                                                                                                                                                                                                                                                                                                                                                                                                                                                                                    |

SCHOLARONE™  
Manuscripts



I, the Submitting Author has the right to grant and does grant on behalf of all authors of the Work (as defined in the below author licence), an exclusive licence and/or a non-exclusive licence for contributions from authors who are: i) UK Crown employees; ii) where BMJ has agreed a CC-BY licence shall apply, and/or iii) in accordance with the terms applicable for US Federal Government officers or employees acting as part of their official duties; on a worldwide, perpetual, irrevocable, royalty-free basis to BMJ Publishing Group Ltd ("BMJ") its licensees and where the relevant Journal is co-owned by BMJ to the co-owners of the Journal, to publish the Work in this journal and any other BMJ products and to exploit all rights, as set out in our [licence](#).

The Submitting Author accepts and understands that any supply made under these terms is made by BMJ to the Submitting Author unless you are acting as an employee on behalf of your employer or a postgraduate student of an affiliated institution which is paying any applicable article publishing charge ("APC") for Open Access articles. Where the Submitting Author wishes to make the Work available on an Open Access basis (and intends to pay the relevant APC), the terms of reuse of such Open Access shall be governed by a Creative Commons licence – details of these licences and which [Creative Commons](#) licence will apply to this Work are set out in our licence referred to above.

Other than as permitted in any relevant BMJ Author's Self Archiving Policies, I confirm this Work has not been accepted for publication elsewhere, is not being considered for publication elsewhere and does not duplicate material already published. I confirm all authors consent to publication of this Work and authorise the granting of this licence.

**Women's experiences with using patient-reported outcome and experience measures in routine perinatal care in the Netherlands: a mixed methods study**

Lyzette T. Laureij<sup>1</sup>, Anne L. Depla<sup>2</sup>, Shariva S. Kariman<sup>2</sup>, Marije Lamain-de Ruiten<sup>1,2</sup>, Hiske E. Ernst-Smelt<sup>1</sup>, Jan Hazelzet<sup>3</sup>, Arie Franx<sup>1</sup>, Mireille N. Bekker<sup>2</sup> - on behalf of the BUZZ project team\*

Corresponding author:

M.N. Bekker

KE.04.123.1, Lundlaan 6, 3584 EA, Utrecht, The Netherlands

Tel: +31887553981

E-mail: <m.n.bekker-3@umcutrecht.nl>

Affiliations:

<sup>1</sup> Department of Obstetrics and Gynaecology, Division Obstetrics and Foetal Medicine, Erasmus MC, Rotterdam, the Netherlands

<sup>2</sup> Department of Obstetrics and Gynaecology, Wilhemina Children's Hospital, University Medical Centre Utrecht, the Netherlands

<sup>3</sup> Department of Public Health, Erasmus MC, Rotterdam, the Netherlands

\* Next to the authors, the BUZZ team consisted of Jolanda H. Vermolen<sup>4</sup>, Simone A. Vankan-Buitelaar<sup>2</sup>, Monique Klerkx<sup>5</sup>, Pieter-Kees de Groot<sup>6</sup>, Nikkie Koper<sup>7</sup>, Hilmar H. Bijma<sup>1</sup>, Bas van Rijn<sup>1</sup>, Elise Neppelenbroek<sup>8</sup>, Sebastiaan W.A. Nij Bijvank<sup>9</sup>, Marieke Veenhof<sup>10</sup>, Margo Lutke Holzik<sup>10</sup>, Jelle Baalman<sup>11</sup>, Josien Vrielink-Braakman<sup>12</sup>

<sup>4</sup> Maternity care organization De Waarden, Schoonhoven, the Netherlands

<sup>5</sup> Integrated obstetric care organization Annature Geboortezorg, Breda, the Netherlands

<sup>6</sup> Department of Obstetrics, Spaarne Gasthuis, Haarlem, the Netherlands

<sup>7</sup> Midwifery practice Duo, Zwanenburg, the Netherlands

<sup>8</sup> Midwifery practice Verloskundigen Bakerraad, Zwolle, the Netherlands

<sup>9</sup> Department of Obstetrics, Isala Clinics, Zwolle, the Netherlands

<sup>10</sup> Department of Obstetrics, Leiden University Medical Center, Leiden, the Netherlands

<sup>11</sup> Department of Obstetrics, Medisch Spectrum Twente, Enschede, the Netherlands

<sup>12</sup> Midwifery practice Verwacht!, Vriezenveen, the Netherlands

Shortened running title: Patient experiences using PROMs and PREMs in perinatal care

Wordcount: 4403

Number of tables (3) and figures (2)

Appendices: 3



## ABSTRACT

### Objectives

To gain insight into the experiences of women with completing and discussing patient reported outcome measures (PROM) and patient reported experience measures (PREM), and tailoring their care based on their outcomes.

### Design

A mixed-methods prospective cohort study.

### Setting

Seven obstetric care networks in the Netherlands that implemented a set of patient-centred outcome measures for pregnancy and childbirth (PCB set), published by the International Consortium for Health Outcomes Measurement.

### Participants

All women receiving the PROM and PREM questionnaires as part of their routine perinatal care, received an invitation for a survey (n=460) and an interview (n=16). The results of the survey were analysed using descriptive statistics; thematic inductive content analysis was applied on the data from open text answers and the interviews.

### Results

More than half of the survey participants (n=255) felt the need to discuss the outcomes of PROM and PREM with their care professionals. The time spent on completing questionnaires and the comprehensiveness of the questions was scored 'good' by most of the survey participants. From the interviews, four main themes were identified: content of the PROM and PREM questionnaires,

1  
2  
3 65 application of these outcomes in perinatal care, discussing PREM, and data capture tool. Important  
4  
5 66 facilitators included awareness of health status, receiving personalised care based on their outcomes  
6  
7 67 and the relevance of discussing PREM six months postpartum. Barriers were found in insufficient  
8  
9 68 information about the goal of PROM and PREM for individual care, technical problems in data  
10  
11 69 capture tools and discrepancy between the questionnaire topics and the care pathway.  
12  
13  
14  
15  
16

## 17 71 **Conclusions**

18  
19 72 This study showed that women found the PCB set an acceptable and useful instrument for symptom  
20  
21 73 detection and personalised care up until six months postpartum. This patient evaluation of the PCB  
22  
23 74 set has several implications for practice regarding the questionnaire content, role of care  
24  
25 75 professionals and congruity with care pathways.  
26  
27  
28  
29

## 30 77 **Key words:**

31  
32 78 Value-based healthcare  
33  
34 79 Obstetrics  
35  
36 80 Perinatal care  
37  
38 81 Patient-reported outcome measures  
39  
40 82 Patient-reported experience measures  
41  
42 83 Shared decision making  
43  
44 84 Qualitative research  
45  
46 85 Quantitative research  
47  
48 86 Mixed methods  
49  
50  
51

## 52 87 53 54 88 **Strengths and limitations of this study**

- 55 89 • This study had a prospective design and was incorporated in an implementation project as  
56  
57  
58 90 part of routine perinatal care.  
59  
60

- 1  
2  
3 91 • As a result of the embedding in an implementation project, we were able to combine the  
4  
5 92 results of a large sample size of survey participants with semi-structured interviews to  
6  
7 93 explore survey answers in-depth, which increased the generalizability of our results.  
8  
9  
10 94 • These are the first experiences from patient perspective regarding completing and  
11  
12 95 discussing PROMs and PREMs during routine perinatal care.  
13  
14 96 • A limitation of this study was the unequal representation of time points for PROM and PREM  
15  
16 97 collection in our interview sample, due to the nature of the implementation project.  
17  
18  
19 98 • The evaluation survey had a response rate of 35%, which creates a risk for non-response bias  
20  
21 99 that should be considered when interpreting our results.  
22  
23

## 24 100 INTRODUCTION

25  
26  
27  
28 101 Healthcare systems are increasingly focusing on creating value for patients.[1] Therefore, patient-  
29  
30 102 reported outcome measures and experience measures (PROM and PREM) are progressively used to  
31  
32 103 guide individual patient care, in quality improvement, and for research purposes. PROM and PREM  
33  
34 104 are defined as information that is provided by patients concerning the impact of their condition,  
35  
36 105 disease or treatment on their health and functioning.[2, 3] In routine care, patients complete PROM  
37  
38 106 and PREM via standardised questionnaires – both generic and disease specific – between visits to  
39  
40 107 care professionals. Care professionals receive notifications about alarm symptoms, such as pain or  
41  
42 108 functional complaints and can review longitudinal PROM and PREM reports over time. This way,  
43  
44 109 symptoms and impairments are more likely to be detected, creating an opportunity to personalise  
45  
46 110 care based on individual needs.[4] In chronic care settings, this approach has been shown to improve  
47  
48 111 shared decision making, patient-clinician relationship and health outcomes.[5, 6]  
49  
50  
51 112 In perinatal care, important outcomes expressing quality of life and social participation can be  
52  
53 113 detained from PROM and PREM, such as maternal depression, incontinence, and birth experience.  
54  
55 114 PROM and PREM may differ greatly and may be independent of provider-reported outcomes,  
56  
57 115 describing far-reaching effects on women’s lives.[7, 8] Additionally, PROM and PREM may highlight  
58  
59  
60

1  
2  
3 116 important outcomes from the patient perspective that remained hidden when collecting provider-  
4  
5 117 reported outcomes only. Therefore, implementation of standardised PROM and PREM, including the  
6  
7 118 adaptation of individual care pathways based on individual outcomes, is essential to further  
8  
9  
10 119 personalize and improve quality of perinatal care from the patient perspective. The International  
11  
12 120 Consortium for Health Outcomes Measurement (ICHOM) provided a set of patient-centred outcome  
13  
14 121 measures for pregnancy and childbirth (PCB Set) for perinatal care containing both provider-  
15  
16 122 reported and patient-reported outcomes.[9] Prior research in the Netherlands found this set to be  
17  
18 123 acceptable and feasible for implementation by all important stakeholders including women.[10, 11]  
19  
20  
21 124 However, little is known regarding women's experiences with completing the PROM and PREM and  
22  
23 125 receiving care based on their individual outcomes as part of routine perinatal care.  
24  
25 126 In the Netherlands, a nationwide implementation project was initiated to facilitate shared decision  
26  
27 127 making by implementing the PROM and PREM of the PCB Set in regular perinatal care. To achieve  
28  
29 128 successful implementation, identifying unanticipated influences, facilitators and barriers among the  
30  
31 129 users during the early implementation process of PROM and PREM is crucial.[12] Our pre-  
32  
33 130 implementation research identified women as important users next to perinatal care professionals.  
34  
35 131 [10, 11] Insights into first women's experiences with receiving personalised care based on their  
36  
37 132 individual PROM and PREM during pregnancy, childbirth and the postpartum period will enhance  
38  
39 133 and improve further implementation of PROM and PREM as part of routine perinatal care.  
40  
41 134 Therefore, alongside the nationwide implementation project, we conducted a mixed methods study  
42  
43 135 to gain insight into the experiences of women with completing and discussing PROM and PREM, and  
44  
45 136 tailoring their care based on their outcomes in a routine perinatal care setting.  
46  
47  
48  
49  
50  
51  
52  
53  
54  
55  
56  
57  
58  
59  
60

## METHODS

### Design

Mixed-method prospective cohort study to gain insight in women's experiences with using the PROM and PREM of the ICHOM PCB set for perinatal care in clinical practice among women receiving perinatal care.

### Setting

This study was conducted in seven obstetric care networks (OCNs) participating in a nationwide implementation project of the ICHOM PCB Set in the Netherlands. Alongside the implementation project in clinic, this study was performed to evaluate women's experiences with this innovation in routine care. The implementation project aimed integration of the PCB Set into routine perinatal care, i.e. that women were invited to complete PROMs and PREMs and discuss them with their care professional as part of routine perinatal care at five time points during their pregnancy or postpartum period. At these time points, different care professionals may have been responsible for the participants' health (see **Figure 1**). Women received an information leaflet regarding the purpose of the PROM and PREM before filling out their first PROM and PREM questionnaire and could complete the questionnaires digitally at home. Care professionals were informed about the content of the PCB Set (**Figure 2**) and how to interpret the results. Training on how to discuss the outcomes was available if needed. Care professionals discussed the results of the PROM and PREM during the next regular visit directly after each time point, also at six months postpartum. Implementation plans differed among the OCNs to enhance local implementation; OCNs collected PROM and PREM during at least one time point, this was not necessarily time point 1 (see **Table 1**).

**Figure 1** Time points for data collection (PROM and PREM) and involvement of different care professionals, according to current practice in the Netherlands.

*The blue dots indicate the five time points for data collection during pregnancy and postpartum. Above the timeline, the involved care professionals are shown. In this project, the outcomes of the PROMs and PREMs were discussed with an obstetric care professional during all time points.[9]*

1  
2  
3 **Figure 2** Pregnancy and childbirth Set as applied in the Netherlands: domains and moments to  
4 measure (adapted from Depla et al.[13]).  
5  
6 *The blue dots indicate the five time points for data collection during pregnancy and postpartum (see*  
7 *also Figure 1). The outcome domains are divided into patient-reported outcome measures (PROMs)*  
8 *and patient-reported experience measures (PREMs). Below, the number of questions of the total*  
9 *questionnaire (PROM and PREM) per time point is shown.*  
10  
11

12  
13 **Table 1 Implementation of time points per obstetric care network**

|                                                 | OCN 1 | OCN 2 | OCN 3 | OCN 4 | OCN 5 | OCN 6 | OCN 7 |
|-------------------------------------------------|-------|-------|-------|-------|-------|-------|-------|
| Time point 1:<br>first visit                    |       |       | ✓     | ✓     | ✓     | ✓     |       |
| Time point 2:<br>28-32 weeks of<br>gestation    | ✓     | ✓     | ✓     | ✓     | ✓     | ✓     |       |
| Time point 3:<br>first days after<br>childbirth |       |       | ✓     | ✓     | ✓     | ✓     | ✓     |
| Time point 4:<br>postpartum<br>check-up         |       | ✓     | ✓     | ✓     | ✓     | ✓     | ✓     |
| Time point 5:<br>6 months<br>postpartum         |       |       |       |       | ✓     |       | ✓     |

173

174 Patient and Public Involvement statement

175 Simultaneously with the implementation of the PCB set, this study was conducted to gain insight  
176 into women's experiences with completing and discussing PROM and PREM. Both the clinical  
177 implementation project and this study were a continuation of previous projects that actively  
178 involved women as important stakeholders, resulting in changes into the Dutch PCB Set, as well as  
179 providing insight in facilitators and barriers to be addressed during the implementation of the PCB  
180 Set in routine care. In this study, we sent out a survey and conducted interviews with women. The  
181 study was designed in close collaboration with care professionals, while taking into account previous  
182 findings from surveys, interviews, and focus group interviews with women.[10, 11, 14] Also, the  
183 PROM and PREM questionnaires used in clinic were tested for comprehensiveness among four

1  
2  
3 184 women with low health literacy skills supported by Pharos, a national centre of expertise in  
4  
5 185 decreasing health inequities.[15] Small language adaptations were made based on this test.  
6  
7

8 186  
9 187 Participants

10 188 As our study was conducted within a large implementation project of the PCB set, all women who  
11  
12  
13 189 received PROM and PREM questionnaires as part of their routine perinatal care in one of the  
14  
15 190 participating OCNs were eligible for this study. Women were invited to participate in this study via a  
16  
17 191 digital link immediately after filling out a PROM/PREM questionnaire at home. They were asked to  
18  
19  
20 192 complete a short evaluation survey and optionally participate in a telephone interview regarding  
21  
22 193 their experiences with completing and discussing the PROM and PREM.  
23

24 194 Inclusion criteria for this study were:

- 25  
26 195 - women completed at least one questionnaire of the PCB set;  
27  
28 196 - women were 16 years or older during the first data collection time point;  
29  
30 197 - women gave their informed consent to use their answers for research.  
31  
32

33 198  
34  
35 199 Data collection  
36

37 200 Data collection was performed from March 2020 up until September 2021. The researchers  
38  
39  
40 201 composed a short evaluation survey (Supplementary Table 1). This anonymous survey was offered to  
41  
42 202 participants via a digital link directly after completing their PROM and PREM. One OCN collected this  
43  
44 203 evaluation survey on paper. No case mix questions were asked to minimise response burden for  
45  
46 204 women who had already completed the PROM and PREM questionnaire. Answers to this survey  
47  
48  
49 205 were not visible to care professionals. At the end of this evaluation survey, participants were asked  
50  
51 206 to provide their telephone number for an in-depth evaluation interview by phone. First, all  
52  
53 207 participants who provided their telephone number were approached for a semi-structured interview  
54  
55 208 by one of the researchers (see for topic list **Table 2**). Further on, purposive sampling was performed,  
56  
57 209 e.g., selecting women that had filled out PROM and PREM at time points 3, 4, and 5, or women who  
58  
59 210 gave specific answers in the evaluation survey. Additionally, care professionals were asked to  
60

1  
2  
3 211 actively recruit women with decreased health literacy skills for an interview by the researchers. Data  
4  
5 212 collection was ended as soon as thematic saturation was accomplished (see Data analysis). All  
6  
7 213 interviews were audio-recorded and transcribed verbatim.  
8  
9  
10  
11  
12  
13  
14  
15  
16  
17  
18  
19  
20  
21  
22  
23  
24  
25  
26  
27  
28  
29  
30  
31  
32  
33  
34  
35  
36  
37  
38  
39  
40  
41  
42  
43  
44  
45  
46  
47  
48  
49  
50  
51  
52  
53  
54  
55  
56  
57  
58  
59  
60

For peer review only



214 **Table 2 Topic list used for the interviews**

| Topics                                               | Sub topics                                                                                                                                                                                                                                                                                                                                                                                                  |
|------------------------------------------------------|-------------------------------------------------------------------------------------------------------------------------------------------------------------------------------------------------------------------------------------------------------------------------------------------------------------------------------------------------------------------------------------------------------------|
| Course pregnancy/childbirth                          | General Health / Experiences pregnancy                                                                                                                                                                                                                                                                                                                                                                      |
| Time spent on completing PROM and PREM - experiences | Experiences completing PROM and PREM<br>Experience on time spend<br>Motivation for completion of PROM and PREM<br>Reasons for (not) completing PROM and PREM in the future<br>Time point 1 & 2: thoughts regarding completing PROM and PREM multiple times during pregnancy and after childbirth<br>Time point 3-5: experiences with completing PROM and PREM after childbirth up until 6 months postpartum |
| Comprehensiveness PROM and PREM                      | Understanding PROM and PREM: language used, reason why PROM and PREM were asked, information provision<br>Social desirability<br>PREM regarding experiences with care providers: completing and discussing                                                                                                                                                                                                  |
| Discussing PROM and PREM with care professionals     | Experiences regarding discussing PROM and PREM<br>Adverse outcomes of PROM and PREM<br>Taboo topics<br>Bond with care professional<br>Unexpected outcomes<br>Resistance regarding discussing PROM and PREM<br>Advantages and gains of discussing PROM and PREM                                                                                                                                              |
| Improvements and suggestions                         | Results of evaluation survey<br>Previously completed PROM and PREM<br>Important topics                                                                                                                                                                                                                                                                                                                      |
| Preferred care provider                              | Time point<br>Outcomes that are discussed                                                                                                                                                                                                                                                                                                                                                                   |
| Shared decision making                               | Care pathway – participant’s influence<br>Discussing wishes and fears regarding pregnancy and childbirth<br>Patient – care professional relationship                                                                                                                                                                                                                                                        |

215 *PROM: patient reported outcome measures. PREM: patient reported experience measures*

1  
2  
3 216 Data analysis  
4

5 217 The quantitative data from the evaluation survey were analysed using descriptive statistics with SPSS  
6  
7 218 version 25 (IBM Corp., Armonk, N.Y., USA). Free text answers were analysed with thematic analysis  
8  
9 219 supported by Microsoft Excel (version 16). The transcriptions from the interviews were checked for  
10  
11 220 accuracy with the original audiotapes by LL. The software program Atlas.ti 9 was used to support  
12  
13 221 thematic inductive content analysis.[16] LL and SK independently coded the transcripts to create a  
14  
15 222 set of preliminary codes and compared the codes to reach consensus. To detect emerging themes,  
16  
17 223 we merged matching codes, and explored links between codes. An overview was constructed of  
18  
19 224 themes and subthemes for women's experiences with completing and discussing PROM and PREM.  
20  
21 225 This overview was compared with the free text answer analysis of the open-ended questions from  
22  
23 226 the survey and combined into an integrated overview. The integrated overview was discussed with  
24  
25 227 AD, ML and MB and subthemes were identified as facilitators and barriers. Reporting followed the  
26  
27 228 Standards for Reporting Qualitative Research (SRQR).[17]  
28  
29  
30  
31  
32  
33  
34  
35  
36  
37  
38  
39  
40  
41  
42  
43  
44  
45  
46  
47  
48  
49  
50  
51  
52  
53  
54  
55  
56  
57  
58  
59  
60

## 230 RESULTS

### 231 Survey

232 460 Participants (35%) filled out the patient evaluation survey from a total of 1318 women who  
233 completed at least one PROM and PREM questionnaire. Descriptive statistics of the survey are  
234 shown in Supplementary Table 2 and Supplementary Figure 1a-d. Regarding the time spent on  
235 completing the questionnaires, 87% of participants indicated this as 'good'. The comprehensiveness  
236 of the questions was indicated as 'good' by most participants (78%). The need to discuss the  
237 outcomes of the questionnaires with the care professional differed: of the participants 39%  
238 answered 'not really', and 35% 'a little', and 20% 'yes'. Of the participants that wanted to discuss the  
239 outcomes, the majority preferred their obstetric care professional for this. The answers from the  
240 open-ended questions are to be discussed below.

### 242 Interviews

243 26 participants provided their telephone number for the interview, none of these participants had  
244 completed PROM and PREM during time point 3 (maternity week). 16 interviews were conducted.  
245 We interviewed two participants that completed PROM and PREM during time point 1 and 4, nine  
246 during time point 2, and three during time point 5. The average age of participants was 34 years [29-  
247 39 years] and the majority were higher educated (14 of 16), i.e., completed an education at a  
248 university or university of applied sciences. Four participants received perinatal care for the first  
249 time; they were pregnant for the first time or had given birth to their first child. Six participants had  
250 received perinatal care by a community midwife, five by a gynaecologist in the hospital, and five by  
251 both community midwives and gynaecologists.

252

1  
2  
3 253 Themes  
4

5 254 The facilitators and barriers identified from the open-ended questions and interviews were allocated  
6  
7 255 to four overarching themes (see Table 3): 1. Content of the PROM and PREM, 2. Application of the  
8  
9 256 outcomes of PROM and PREM in perinatal care, 3. Discussing PREM, and 4. Data capture tool. These  
10  
11 257 themes including facilitators and barriers are described below in detail, with illustrative quotes.  
12  
13  
14  
15 258

16  
17  
18 259 *1. Content of PROM and PREM questionnaires*  
19

20  
21 260 Most participants found the language of the PROM and PREM clear and understood the questions.  
22  
23 261 Participants felt that the PROM and PREM covered most important topics and were of a good length.  
24  
25 262 Most participants emphasised the importance of PROM and PREM addressing taboo topics, such as  
26  
27 263 incontinence, depression, and pain with intercourse. In the interviews, participants shared that  
28  
29 264 completing PROM and PREM on these topics created awareness about their current health status  
30  
31 265 and potential problems during pregnancy, childbirth and first months postpartum (see Quote 1).  
32  
33  
34  
35 266

36  
37  
38 267 *Quote 1 Awareness of taboo topics:*

39  
40 *[Complete PROM/PREM to prepare for their next visit] "I assume [advantages] for*  
41  
42 *both parties: for yourself because you think about everything, also things you*  
43  
44 *wouldn't consider at first. And I expect it [capturing PROM and PREM] would be*  
45  
46 *helpful for a care professional as well, because he can ask further than just the*  
47  
48 *topics a patient brings up at that moment."* (T4)  
49  
50

51 268  
52  
53  
54 269 However, the language of some questions was too difficult, especially for lower educated women,  
55  
56 270 and several PROMs were not specific in timing or location of physical complaints. This led to  
57  
58 271 different interpretations of the questions. Regarding the content of the PREM, participants  
59  
60

1  
2  
3 272 experienced discrepancy between the timing of the questions and the care received. For example, at  
4  
5 273 time point 2, options for pain management during childbirth had often not been discussed yet, thus  
6  
7 274 participants answered negative to the PREM addressing this. Another issue mentioned by the  
8  
9  
10 275 interview participants in relation to PREM, was that they often received care from multiple care  
11  
12 276 professionals. They stated that they had to average their experiences when completing the PREM.  
13  
14 277 Several participants reported that they missed the answer option “I don’t know (yet)” or “not  
15  
16 278 applicable” in some questions, and the possibility to explain their answers. Also, participants missed  
17  
18 279 the possibility in the questionnaires to point out important outcomes. This topic was expanded  
20  
21 280 during the interviews; participants wanted to be able to indicate outcomes important to discuss  
22  
23 281 during the following visit (see Quote 2).  
24  
25  
26 282

27  
28  
29 *Quote 2 No opportunity to explain answers or pointing out important topics*

30  
31 *[Opportunity for explanation during completion of PROM and PREM] “You should*  
32  
33 *have a choice: whether you want to discuss it [your answers] or not, whether you*  
34  
35 *want to be referred or not. [...] You could put it [an open text field] at the end of*  
36  
37 *the questionnaire: ‘If you want consultation on this, if you have a top 3 or top 5 or*  
38  
39 *something of the things that were just asked, what are the topics you would like*  
40  
41 *to discuss with your midwife?’” (T2)*  
42  
43  
44

45 283  
46  
47  
48 284 Although most important topics were covered in the PROM and PREM, some participants stated that  
49  
50 285 there was too little attention for prevalent physical problems. They missed questions concerning  
51  
52 286 pelvic pain and haemorrhoids, especially at time point 2. Lastly, the timing of one specific topic was  
53  
54 287 debated by several participants: the PROM breastfeeding. At time point 2, this topic was  
55  
56 288 experienced as too early since most women did not know whether they intended to breastfeed and  
57  
58  
59  
60

1  
2  
3 289 could not properly answer the full questionnaire about self-efficacy. At time point 4, participants  
4  
5 290 indicated it felt too late to discuss problems with breastfeeding.  
6  
7

8 291  
9

10  
11 292 *2. Application of the outcomes of PROM and PREM in perinatal care*  
12

13  
14 293 Most participants indicated that filling out PROM and PREM helped them in preparing their next visit  
15  
16 294 to their obstetric care professional. They stated that thinking about the topics addressed by the  
17  
18 295 questionnaires made them know better what to expect from and to discuss in the following visit.  
19  
20 296 Interview participants also pointed out that the use of PROM and PREM led to discussion of topics  
21  
22 297 that previously were no part of the conversation with their care professional. Some participants  
23  
24 298 indicated that they were unaware of some topics being pregnancy related, such as psychological  
25  
26 299 problems. Furthermore, some participants from the interviews said that they felt their care was  
27  
28 300 personalised based on their individual outcomes, for example extra attention, information, or a  
29  
30 301 referral for specialised care (see Quote 3 and Quote 4).  
31  
32  
33  
34  
35 302

36  
37  
38 *Quote 3 Care is personalised based on individual outcomes*  
39

40 *“Then she [the care professional that discussed her outcomes with her] said she could*  
41 *refer me to a clinic for pelvic problems if I wanted to. [...] I thought that was very good.*  
42 *They directly did a follow-up and offered me sort of an option like ‘you could this’.” (T5)*  
43  
44  
45  
46  
47  
48

49 *Quote 4 Care is personalised based on individual outcomes*  
50

51 *[her PROM answers indicated depressive symptoms] “Well... personally I think I, and*  
52 *they too [care professionals], gave some extra attention to my mental health.” (T2)*  
53  
54  
55

56 303  
57  
58  
59  
60

1  
2  
3 304 At time point 5, one participant from the interviews felt relieved that her care professional paid  
4  
5 305 attention to her incontinence and psychological problems. She felt that otherwise she would not  
6  
7 306 have had any care professional to discuss these issues with.  
8  
9  
10 307 Despite the availability of an information leaflet and their care professionals' explanation, many  
11  
12 308 participants had misunderstood the aim of the project. They thought it was a research project and  
13  
14 309 that their answers would be used for research purposes only. This indicates that the information  
15  
16 310 about the purpose of PROM and PREM for individual care was insufficient, which posed a major  
17  
18 311 barrier to complete questionnaires multiple times (see Quote 5).  
19  
20  
21  
22 312

23  
24  
25 *Quote 5 Insufficient information on the aim personalised care based on PROM and*  
26  
27 *PREM*

28  
29 *"It was not clear to me why it [PROM and PREM] was asked. And I also can't*  
30  
31 *remember that it [PROM and PREM questionnaires] included an introduction text*  
32  
33 *or something like that... maybe that was included you know... but for me it was not*  
34  
35 *clear what they wanted to do with that information [her answers]" (T2)*  
36  
37

38 313  
39  
40 314 Furthermore, some participants stated it was uncertain when the outcomes of their questionnaire  
41  
42 315 would be discussed with them; not all participants had their outcomes discussed during the first visit  
43  
44 316 after completing the PROM and PREM. One participant said that her outcomes had never been  
45  
46 317 discussed with her. Several participants mentioned that completing PROM and PREM gave them the  
47  
48 318 feeling of 'impersonalised care', as if care professionals tried to avoid the conversation about these  
49  
50 319 topics. Other interview participants felt unsure about how the outcomes of the PROM and PREM  
51  
52 320 would impact the quality of care of their individual care pathway. For example, when filling out  
53  
54 321 negative experiences regarding one specific care professional, they preferred to receive care from  
55  
56 322 another care professional because of their negative experience. Some participants, from both the  
57  
58  
59  
60

1  
2  
3 323 survey and the interviews, felt that discontinuity in care professionals posed a barrier to discuss the  
4  
5 324 outcomes. They did not feel at ease discussing outcomes with a care professional they had never  
6  
7  
8 325 met before (see Quote 6). Interview participants also did not always know which care professional  
9  
10 326 was responsible for their outcomes.  
11

12 327

15 *Quote 6 Discontinuity of care professional*

17 *“Nothing really popped up [from her answers to the questionnaires], but if that would have*  
18 *been the case than I think it is harder to discuss some topics with a person [care*  
19 *professional] that I have never met. Especially because some of these topics are sensitive*  
20 *and vulnerable.” (T1)*  
21  
22  
23  
24  
25

26 328

29 329 *3. Discussing PREM*

31  
32 330 Participants stated that the PREM were an important facilitator for them to complete the PROM and  
33  
34 331 PREM. They stressed that they found it very important that care professionals in general have insight  
35  
36 332 in patients’ experiences with their provided care. Additionally, participants from the interviews  
37  
38 333 thought that the insight in individual PREM may lead to improved quality of individual care.  
39  
40 334 Especially participants that had completed PREM at time point 5 stated that the PREM were  
41  
42 335 important to complete and to discuss, because it helped them to process the pregnancy and  
43  
44 336 postpartum period (see Quote 7).  
45  
46  
47

48 337

51 *Quote 7 Discussing PREM at time point 5 important for reflection on pregnancy and*  
52 *childbirth*

53  
54  
55 *[After completing the T5 questionnaire] “The fact that she [care professional] called back,*  
56 *that she called back actually concerned, and just ... just was talking with me and*  
57  
58  
59  
60



1  
2  
3 *explained things. That has really, also in my head, enormously helped to sort things out.*

4  
5 *[...] Yes, I really look back on that [childbirth and postpartum period] better now.” (T5)*

6  
7  
8 338

9  
10 339 Additionally, analysis of aggregate PREM results may indicate improvement topics, according to the

11  
12 340 interview participants. At the same time, a barrier was identified in overlap; some participants

13  
14 341 received PREM and other evaluation questionnaires from their community midwives postpartum,

15  
16 342 and it was unclear for them whether these outcomes were also sent to their midwives. Ambiguous

17  
18 343 opinions were found regarding discussing PREM individually. Some participants, who were satisfied

19  
20 344 with the care they received, indicated they would have preferred addressing negative experiences

21  
22 345 directly with their care professional, instead of via PREM (see Quote 8). In contrast to participants

23  
24 346 that had had negative experiences: they explained it felt easier to indicate this via PREM instead of

25  
26 347 discussing it face to face with their care professional.

27  
28  
29  
30  
31 348

32  
33  
34 *Quote 8 Negative PREM preferably face to face*

35  
36 *[addressing care experiences with care professional] “I believe it is fairer when*

37  
38 *they [care professionals] hear it from me personally, but I can imagine that some*

39  
40 *people don’t feel comfortable with that and prefer to leave their feedback*

41  
42 *anonymously and that eventually it will reach the care professional anyway.” (T2)*

43  
44  
45 349

46  
47  
48 350 Additionally, some participants stated to feel dependent of their care professional during their care

49  
50 351 pathway, which posed a barrier to report negative experiences in the PREM.

51  
52  
53 352

54  
55  
56 353 *4. Data capture tool*

1  
2  
3 354 Participants indicated that they preferred to complete PROM and PREM digitally. Completing the  
4  
5 355 PROM and PREM on mobile phones or tablets was preferred by most women. However, participants  
6  
7 356 pointed out technical issues as a major barrier; PROM and PREM questions and answers that were  
8  
9  
10 357 not entirely visible on a mobile phone led to incomplete or incorrect outcomes according to some  
11  
12 358 women (see Quote 9).

13  
14 359

17 *Quote 9 Technical problems and bugs*

18  
19 *[Completing PROM and PREM] "On my smartphone I can't see all the questions.*

20  
21 *On the iPad, some answer options disappear, so I must check three times whether*

22  
23 *my answers are completed correctly. For example, satisfaction is measured on a*

24  
25 *scale from 1 to 4. But when I go to the next page and back, it appears to be a scale*

26  
27 *from 1 to 10."* (T2)

28  
29  
30  
31 360

32  
33 361 Also, some participants received PROM and PREM belonging to a different time point or received the  
34  
35 362 same PROM and PREM multiple times. Furthermore, several interviewed participants stated that it  
36  
37 363 was unclear which organization sent the invitation to complete the questionnaires and which care  
38  
39 364 professionals had access to their answers. This made them have doubts regarding privacy (see Quote  
40  
41 365 10).

42  
43  
44  
45 366

46  
47  
48 *Quote 10 Privacy issues*

49  
50 *[Completing questions regarding incontinence, mental health, physical complaints]: "And*

51  
52 *yes, those are questions of a kind that you would only complete honestly if you are*

53  
54 *completely sure that you can trust that they will end up at the right person."* (T2)

55  
56  
57 367

368 **Table 3 Overarching themes and identified facilitators and barriers**

| Themes                                                   | Facilitators                                                                                                                                                                                                                                                                                                      | Barriers                                                                                                                                                                                                                                                                                                                                                                                          |
|----------------------------------------------------------|-------------------------------------------------------------------------------------------------------------------------------------------------------------------------------------------------------------------------------------------------------------------------------------------------------------------|---------------------------------------------------------------------------------------------------------------------------------------------------------------------------------------------------------------------------------------------------------------------------------------------------------------------------------------------------------------------------------------------------|
| <b>1. Content of PROM and PREM questionnaires</b>        | Clear language<br>PROM and PREM covering all important topics<br>Good length of questionnaires<br>Awareness of taboo topics                                                                                                                                                                                       | Language of some questions too difficult<br>Some PROM questions not specific in time or location<br>Discrepancy questions with care path and situation<br>Absence of answer option "I don't know (yet)" or "not applicable"<br>No opportunity to explain answers or pointing out important outcomes<br>Too little attention to physical problems (time point 2)<br>(Timing of) PROM breastfeeding |
| <b>2. Application of the outcomes in individual care</b> | Better preparation for next visit/appointment<br>Discussing topics that were not discussed before<br>Care is personalised based on individual outcomes<br>Discussing outcomes at Time point 5                                                                                                                     | Insufficient information on the aim personalised care based on PROM and PREM<br>Uncertainty when outcomes are discussed<br>Feeling of impersonalised care<br>Unsure of impact on individual quality of care<br>Discontinuity of care professional                                                                                                                                                 |
| <b>3. Discussing PREMs</b>                               | PREM being included in the questionnaires<br>Insight in individual PREM improves individual quality of care<br>Discussing PREM at Time point 5 important for reflection on pregnancy and childbirth<br>Analysis of aggregate PREM for care improvement<br>Completing PREM safer option in case of dissatisfaction | Receiving multiple questionnaires regarding experiences<br>Negative PREM preferably face to face<br>Dependency of care professional                                                                                                                                                                                                                                                               |
| <b>4. Data capture tool</b>                              | Completing questionnaires digitally<br>Availability on mobile phones or tablets                                                                                                                                                                                                                                   | Technical problems and bugs<br>Privacy issues                                                                                                                                                                                                                                                                                                                                                     |

369 *PROM: patient-reported outcome measures, PREM: patient-reported experience measures*

## DISCUSSION

This mixed methods study provides insight into the first experiences of women with completing and discussing PROM and PREM at different time points during and after pregnancy as part of routine perinatal care. The evaluation survey results showed that the time spent on completing the PROM and PREM was acceptable, and their content was comprehensive. Most survey participants felt the need to discuss the outcomes. In the interviews, participants were mainly positive about discussing their individual PROM and PREM outcomes with their perinatal care professionals. Women's barriers and facilitators to complete and discuss PROM and PREM individually were identified in four overarching themes.

### *Strengths and limitations*

A strength of this study was the prospective design, incorporated in an implementation project as part of regular care. Its results supported further implementation of the outcome set, as they were directly translated into adaptations in the clinical project, such as IT improvements and an option to further explain an answer. Accordingly, by providing PROMs and PREMs throughout pregnancy and the postpartum period, women can become aware of what high-quality care encompasses, and of complications or symptoms that can occur. This awareness can empower women and support them to adjust their care pathway to their individual preferences and values. Another strength was the large sample size of survey participants combined with semi-structured interviews to explore survey answers in-depth, which increased the generalizability of our results. Also, the participation threshold was lowered by conducting the survey anonymously and the interviews by telephone, limiting the risk of selection bias. However, the survey response rate of 35% does create a risk for non-response bias. Despite our efforts to minimise the risk of selection bias with purposive sampling, mostly higher educated women were included, and only Dutch speaking women could participate to

1  
2  
3 394 the surveys. This was inevitable to some extent, as the sample was taken from an already selected  
4  
5 395 population: women completing the PROM and PREM were Dutch speaking only and had a relatively  
6  
7 396 good health literacy, as no support was provided with completing them. This limitation should be  
8  
9  
10 397 taken into account when interpreting our findings and stresses the importance of future efforts to  
11  
12 398 engage all women when implementing PROM and PREM to prevent further health inequities.  
13  
14 399 Nevertheless, this exploration of patient experiences with individual PROM and PREM was the first  
15  
16 400 among women receiving perinatal care. A second limitation, resulting from the outline of the  
17  
18 401 implementation project, was the unequal representation of time points for PROM and PREM  
19  
20 402 collection in our interviews. Despite our strategy to ask care professionals to recruit participants for  
21  
22 403 the interviews directly, i.e., without filling out the survey, we could not interview women who had  
23  
24 404 completed PROM and PREM at time point 3 (maternity week).  
25  
26  
27  
28  
29  
30

#### 31 406 *Compared with literature*

32  
33 407 In line with findings in other disciplines, discussing PROM and PREM with care professionals as part  
34  
35 408 of routine perinatal care was found to improve patient satisfaction and willingness to complete the  
36  
37 409 questionnaires.[6, 18-20] Participants felt better prepared for their next visit and discussed topics  
38  
39 410 that were not discussed before, which reconfirms results from large studies in chronic care  
40  
41 411 settings.[20-22] At the same time, a significant part of our survey respondents did not feel the need  
42  
43 412 to discuss their outcomes. Moreover, for some women completing the questionnaires even felt as  
44  
45 413 impersonalized care. As the survey was offered directly after completing the PROM and PREM,  
46  
47 414 survey participants had not yet discussed their outcomes with their care professional. These findings  
48  
49 415 indicate that discussing outcomes are an essential part of using PROM and PREM in clinical  
50  
51 416 practice.[6] Another explanation could be inadequate information provision, as several women  
52  
53 417 stated that the purpose of the PROM and PREM was unclear to them. As women's perception of this  
54  
55 418 purpose largely depends on their care professional, care professionals may improve this by actively  
56  
57  
58  
59  
60

1  
2  
3 419 using PROM and PREM as a part of routine care. For example, by encouraging women to consider  
4  
5 420 which outcomes they want to discuss in the next visit.  
6  
7

8 421  
9  
10  
11 422 Using individual outcomes to tailor care was an important facilitator to complete PROM and PREM  
12  
13 423 over the course of pregnancy and postpartum. Nevertheless, two important barriers to use PROM  
14  
15 424 and PREM individually were raised by our participants as well. First, discrepancy between the  
16  
17 425 timelines of provided care and the PROM and PREM was pointed out. For example, a PREM  
18  
19 426 questioning information provision on pain relief was sent to women, before care professionals  
20  
21 427 addressed this topic according to standard care. Synchronising the time points of the PCB set with  
22  
23 428 routine perinatal care pathways may solve this barrier. Based on compliance to the PROM and PREM  
24  
25 429 and results of the PROM and PREM, concrete recommendations to adapt the PCB set's content and  
26  
27 430 timeline have been suggested in a recent publication, and are in accordance with women's  
28  
29 431 experiences found in this study. [13] Secondly, discontinuity in care professional was posed as a  
30  
31 432 barrier, as discussing PROM and PREM with different care professionals lead to discomfort among  
32  
33 433 participants. Discussing outcomes in the multidisciplinary setting of perinatal care may be easier if a  
34  
35 434 principal care professional is allocated to every pregnant woman. A relationship of trust between  
36  
37 435 care professional and patients may be a crucial facilitator for completing and discussing PROM and  
38  
39 436 PREM, especially when discussing taboo topics such as incontinence.[23] This may provide  
40  
41 437 opportunity to improve perinatal care outcomes, as several taboo topics have been shown highly  
42  
43 438 prevalent and only 15% of the affected women bring them up during a postpartum check-up.[13, 24]  
44  
45 439 Additionally, although hard to accomplish by perinatal care professionals, our participants stated that  
46  
47 440 evaluating their outcomes at six months postpartum with a perinatal care professional was of added  
48  
49 441 value to the regular postpartum check-up. This reconfirms previously reported patient views  
50  
51 442 regarding time point five of the PCB set.[10, 11] Compared to the check-up at six weeks postpartum,  
52  
53 443 at six months postpartum most women have further recovered in multiple domains and resumed  
54  
55  
56  
57  
58  
59  
60

1  
2  
3 444 their work and social life. Hence, at this moment, the sustainability and severity of physical or mental  
4  
5 445 problems can be determined and referred for, improving long-term outcomes of perinatal care.  
6  
7

8 446  
9  
10 447 Confirming pre-implementation studies, our participants emphasized that PREM were an important  
11  
12 448 facilitator to complete the questionnaires.[10, 11] However, evidence on individual PREM use as part  
13  
14 449 of clinical practice is scarce. This study revealed different opinions amongst women: some preferred  
15  
16 450 to address negative experiences face to face, some felt PREM made it easier to raise and others felt  
17  
18 451 too dependent on their care professional to discuss a negative experience at all. Future research  
19  
20 452 should evaluate the possible effects of offering each woman a choice whether her individual answers  
21  
22 453 are visible to care professionals and discussed as part of her care.  
23  
24  
25  
26  
27 454

28  
29 455 As shown before from a professional perspective, a good functioning data capture tool for  
30  
31 456 assessment and real-life visualisation of patient reported measures is essential for successful  
32  
33 457 implementation.[6, 25, 26] In our patient evaluation, technological issues of the data capture tools  
34  
35 458 were also a major barrier for completing the questionnaires. Although challenging in terms of inter-  
36  
37 459 organisational collaboration and IT infrastructure, this project was one of the first to attempt system  
38  
39 460 wide implementation of PROM and PREM as a standard part of individual perinatal care to guide  
40  
41 461 individual care and personalised care pathways. In the transformation towards health care systems  
42  
43 462 that provide patient-centred care over the full cycle of care, it is essential to use data capture tools  
44  
45 463 that facilitate information exchange between all health care tiers involved with a disease or  
46  
47 464 condition.  
48  
49  
50  
51  
52

53 465  
54  
55 466 *Future research and implications*  
56  
57  
58  
59  
60

1  
2  
3 467 To achieve personalized care based on PROM and PREM, patient engagement is essential but  
4  
5 468 requires efforts at several points. For successful implementation, women will benefit from a system-  
6  
7 469 wide data capture tool, a principal care professional to discuss their outcomes with and a timeline of  
8  
9 470 PROM and PREM collection that fits clinical care: matching their appointments and content of care  
10  
11 471 pathways. Also, an open text field to explain answers and point out outcomes they want to discuss  
12  
13 472 could empower women to take an active role in their care. Lastly, when completing PROM and  
14  
15 473 PREM, women should be clearly informed about 1) the purpose of using their answers for  
16  
17 474 personalized care and 2) the topics addressed by the questionnaires at each time point and their  
18  
19 475 relation to pregnancy and childbirth. Since care professionals are crucial in providing this information  
20  
21 476 and in discussing the outcomes, future research may focus on the experiences of care professionals  
22  
23 477 with PROM and PREM use in perinatal care. To engage care professionals, it would be useful to  
24  
25 478 evaluate training strategies, but also their perceived benefits when working with PROM and PREM.  
26  
27 479 These could include direct improvement of individual care for their patients, as well as insight in the  
28  
29 480 results of their efforts in terms of patient outcomes.[14] These practice implications resulting from  
30  
31 481 women's reflections on individual level PROM and PREM use can advance structural integration of  
32  
33 482 women's perspective in clinical care. Although clinical integration can enable group level use, further  
34  
35 483 research is still needed to explore how PROM and PREM can contribute to embed patients'  
36  
37 484 perspective in research and management decisions as well.  
38  
39  
40  
41  
42  
43  
44  
45  
46  
47  
48  
49

## 486 *Conclusions*

50 487 This study reported the first patient experiences with completing and discussing PROM and PREM as  
51  
52 488 part of perinatal care. The ICHOM PCB set was found to be an acceptable and useful instrument for  
53  
54 489 symptom detection and personalized perinatal care up until 6 months postpartum. Women's  
55  
56 490 reflections on these PROM and PREM allow several practice implications to improve the  
57  
58 491 questionnaire content, the role of care professionals and congruity with routine care pathways.  
59  
60



## 492 Acknowledgements

493 We acknowledge the women participating in this study. We thank the participating care  
494 professionals for approaching women and for discussing the PROMs and PREMs.

## 496 Funding statement:

497 This work was supported by Zorginstituut Nederland (ZIN) grant number 2018026697.

## 498 Competing interests statement:

499 AF and ML were chair and member respectively of the ICHOM working group that developed the PCB  
500 standard outcome set. The other authors have nothing to declare.

## 502 Contributorship statement:

503 AF, HE, JH, and MB led the overall implementation project in practice and established its funding.  
504 Collaborators of the BUZZ team led local implementation and recruited study participants. This study  
505 was designed by LL, AD, and MLdR under supervision of AF, HE and MB. LL and SK performed the  
506 interviews for data collection and analysed the data under supervision of MB. LL, AD, and MB  
507 interpreted the data. LL and AD wrote the first version of the manuscript and made adaptations after  
508 feedback of the other authors under supervision of MB. MB, AF, JH, HE, MLdR, SK, and the BUZZ  
509 team reviewed the manuscript and approved the final version. MB is the guarantor for the final  
510 product.

511

## 512 Details of Ethics Approval

513 The Medical Ethics Committee Erasmus Medical Centre (MEC-2020-0129) declared that the rules laid  
514 down in the Medical Research Involving Human Subjects Act (also known as WMO) do not apply to  
515 this study. This study was exempt from formal medical ethical assessment. Local approval of the  
516 regional ethical boards was obtained in each participating OCN. All participants signed written  
517 informed consent.

## 519 Data availability statement

520 Data are available upon reasonable request.

For peer review only

521 **References**

- 522 1. Porter ME, Teisberg EO. Redefining health care: creating value-based competition on results:  
523 Harvard Business Press; 2006.
- 524 2. Gliklich RD, NA, Leavy M. Registries for Evaluating Patient Outcomes: A User's Guide  
525 [Internet]. 3 ed 2014 Apr 2014.
- 526 3. U.S. Department of Health Services Human F.D.A. Center for Drug Evaluation Research, U.S.  
527 Department of Health Human Services F.D.A. Center for Biologics Evaluation Research, U.S.  
528 Department of Health Human Services F.D.A. Center for Devices Radiological Health, Guidance for  
529 Industry: Patient-Reported Outcome Measures: Use in Medical Product Development to Support  
530 Labeling Claims: Draft Guidance. *Health Qual Life Outcomes*, 4(2006) , pp. 79.
- 531 4. Basch E. Patient-reported outcomes—harnessing patients' voices to improve clinical care.  
532 *New England Journal of Medicine*. 2017;376(2):105-8.
- 533 5. Basch E, Barbera L, Kerrigan CL, Velikova G. Implementation of patient-reported outcomes in  
534 routine medical care. *American Society of Clinical Oncology Educational Book*. 2018;38:122-34.
- 535 6. van Egdom LSE, Oemrawsingh A, Verweij LM, Lingsma HF, Koppert LB, Verhoef C, et al.  
536 Implementing patient-reported outcome measures in clinical breast cancer care: a systematic review.  
537 *Value in Health*. 2019;22(10):1197-226.
- 538 7. Martin CJH, Martin CR. Development and psychometric properties of the Birth Satisfaction  
539 Scale-Revised (BSS-R). *Midwifery*. 2014;30(6):610-9.
- 540 8. Mason L, Glenn S, Walton I, Appleton C. The experience of stress incontinence after  
541 childbirth. *Birth*. 1999;26(3):164-71.
- 542 9. Nijagal MA, Wissig S, Stowell C, Olson E, Amer-Wahlin I, Bonsel G, et al. Standardized  
543 outcome measures for pregnancy and childbirth, an ICHOM proposal. *BMC Health Serv Res*.  
544 2018;18(1):953.
- 545 10. Depla AL, Ernst-Smelt HE, Poels M, Crombag NM, Franx A, Bekker MN. A feasibility study of  
546 implementing a patient-centered outcome set for pregnancy and childbirth. *Health Sci Rep*.  
547 2020;3(3):e168.
- 548 11. Laureij LT, Been JV, Lugtenberg M, Ernst-Smelt HE, Franx A, Hazelzet JA, et al. Exploring the  
549 applicability of the pregnancy and childbirth outcome set: A mixed methods study. *Patient Educ*  
550 *Couns*. 2019.
- 551 12. Damschroder LJ, Aron DC, Keith RE, Kirsh SR, Alexander JA, Lowery JC. Fostering  
552 implementation of health services research findings into practice: a consolidated framework for  
553 advancing implementation science. *Implement Sci*. 2009;4:50.
- 554 13. Depla AL, Lamain-de Ruiten M, Laureij LT, Ernst-Smelt HE, Hazelzet JA, Franx A, et al. Patient-  
555 Reported Outcome and Experience Measures in Perinatal Care to Guide Clinical Practice: Prospective  
556 Observational Study. *Journal of Medical Internet Research*. 2022;24(7):e37725.
- 557 14. Depla AL, Crombag NM, Franx A, Bekker MN. Implementation of a standard outcome set in  
558 perinatal care: a qualitative analysis of barriers and facilitators from all stakeholder perspectives.  
559 *BMC Health Serv Res*. 2021;21(1):113.
- 560 15. Pharos. Pharos 2022 [Available from: <https://www.pharos.nl/>].
- 561 16. Green J, Thorogood N. *Qualitative methods for health research*: Sage; 2018.
- 562 17. O'Brien BC, Harris IB, Beckman TJ, Reed DA, Cook DA. Standards for reporting qualitative  
563 research: a synthesis of recommendations. *Acad Med*. 2014;89(9):1245-51.
- 564 18. Chen J, Ou L, Hollis SJ. A systematic review of the impact of routine collection of patient  
565 reported outcome measures on patients, providers and health organisations in an oncologic setting.  
566 *BMC health services research*. 2013;13(1):1-24.
- 567 19. Basch E, Deal AM, Dueck AC, Scher HI, Kris MG, Hudis C, et al. Overall Survival Results of a  
568 Trial Assessing Patient-Reported Outcomes for Symptom Monitoring During Routine Cancer  
569 Treatment. *Jama*. 2017;318(2):197-8.
- 570 20. Lapin BR, Honomichl R, Thompson N, Rose S, Abelson A, Deal C, et al. Patient-reported  
571 experience with patient-reported outcome measures in adult patients seen in rheumatology clinics.  
572 *Qual Life Res*. 2021;30(4):1073-82.

- 1  
2  
3 573 21. Lapin B, Udeh B, Bautista JF, Katzan IL. Patient experience with patient-reported outcome  
4 574 measures in neurologic practice. *Neurology*. 2018;91(12):e1135-e51.  
5 575 22. van der Horst C. Personalized Health Care for Orofacial Cleft Patients. In: van Weert N,  
6 576 Hazelzet J, editors. *Personalized Specialty Care: Value-Based Healthcare Frontrunners from the*  
7 577 *Netherlands*. Cham: Springer International Publishing; 2021. p. 41-7.  
8 578 23. Oemrawsingh A, Hazelzet J, Koppert L. The State of Patient-Centered Breast Cancer Care: An  
9 579 Academic Center's Experience and Perspective. *Personalized Specialty Care*: Springer; 2021. p. 127-  
10 580 35.  
11 581 24. Schütze S, Hohlfeld B, Friedl TWP, Otto S, Kraft K, Hancke K, et al. Fishing for (in) continence:  
12 582 long-term follow-up of women with OASIS—still a taboo. *Archives of Gynecology and Obstetrics*.  
13 583 2021;303(4):987-97.  
14 584 25. Foster A, Croot L, Brazier J, Harris J, O’Cathain A. The facilitators and barriers to  
15 585 implementing patient reported outcome measures in organisations delivering health related  
16 586 services: a systematic review of reviews. *Journal of patient-reported outcomes*. 2018;2(1):1-16.  
17 587 26. Arora J, Haj M. Implementing ICHOM's standard sets of outcomes: cleft lip and palate at  
18 588 Erasmus University Medical Centre in the Netherlands. *International Consortium for Health*  
19 589 *Outcomes Measurement (ICHOM)*, London. 2016.

22  
23 590

24  
25 591

peer review only



**Figure 1** Time points for data collection (PROM and PREM) and involvement of different care professionals, according to current practice in the Netherlands.

*The blue dots indicate the five time points for data collection during pregnancy and postpartum. Above the timeline, the involved care professionals are shown. In this project, the outcomes of the PROMs and PREMs were discussed with an obstetric care professional during all time points. [7]*

|                                                                     | 1                                        | 2                                                        | 3                           | 4                                                  | 5                      |      |
|---------------------------------------------------------------------|------------------------------------------|----------------------------------------------------------|-----------------------------|----------------------------------------------------|------------------------|------|
|                                                                     | 1 <sup>st</sup> trimester<br>First visit | 3 <sup>rd</sup> trimester<br>28-32 weeks<br>of gestation | after birth<br>(first days) | Postpartum<br>check-up (~6<br>weeks<br>postpartum) | 6 months<br>postpartum |      |
| <b>Outcome Domain</b>                                               |                                          |                                                          |                             |                                                    |                        |      |
| Social support                                                      |                                          |                                                          |                             |                                                    |                        | PROM |
| Health related quality of life                                      |                                          |                                                          |                             |                                                    |                        |      |
| Mental health                                                       |                                          |                                                          |                             |                                                    |                        |      |
| Incontinence                                                        |                                          |                                                          |                             |                                                    |                        |      |
| Pain with intercourse                                               |                                          |                                                          |                             |                                                    |                        |      |
| Breastfeeding intention/success                                     |                                          |                                                          |                             |                                                    |                        |      |
| Breastfeeding confidence                                            |                                          |                                                          |                             |                                                    |                        |      |
| Mother-child bonding                                                |                                          |                                                          |                             |                                                    |                        |      |
| Confidence with role as mother                                      |                                          |                                                          |                             |                                                    |                        |      |
| Satisfaction with results of care                                   |                                          |                                                          |                             |                                                    |                        | PREM |
| Healthcare responsiveness                                           |                                          |                                                          |                             |                                                    |                        |      |
| Birth experience                                                    |                                          |                                                          |                             |                                                    |                        |      |
| Pain relief (Dutch addition)                                        |                                          |                                                          |                             |                                                    |                        |      |
| Role partner (Dutch addition)                                       |                                          |                                                          |                             |                                                    |                        |      |
| Continuity of care (Dutch addition)                                 |                                          |                                                          |                             |                                                    |                        |      |
| Number of questions (min-max)<br>dependent on screening question(s) | 18 – 37                                  | 30 – 64                                                  | 9 – 24                      | 50 – 84                                            | 27 – 46                |      |

**Figure 2** Pregnancy and childbirth Set as applied in the Netherlands: domains and moments to measure (adapted from Depla et al.[13]).

The blue dots indicate the five time points for data collection during pregnancy and postpartum (see also Figure 1). The outcome domains are divided into patient-reported outcome measures (PROMs) and patient-reported experience measures (PREMs). Below, the number of questions of the total questionnaire (PROM and PREM) per time point is shown.

1  
2  
3 **Supplementary Table 1 Evaluation survey**  
4

5  
6 **Q1) I found the time needed to complete the PROM and PREM ...**  
7

|    |          |
|----|----------|
| 8  | Too much |
| 9  | A lot    |
| 10 | Good     |
| 11 | Short    |

12

13  
14 **Q2) Were you able to properly complete all PROM and PREM?**  
15

|    |                                        |
|----|----------------------------------------|
| 16 | Yes                                    |
| 17 | No, I did not understand all questions |
| 18 | No, the questions were too personal    |
| 19 | Other: .....                           |

20

21  
22 **Q3) During the next visit, you will discuss the outcomes of the PROM and PREM with you**  
23 **care provider. Do you feel the need to discuss the outcomes?**  
24

|    |            |                     |
|----|------------|---------------------|
| 25 | Yes        | → Go to question 3b |
| 26 | A little   | → Go to question 3b |
| 27 | Not really | → Go to question 3c |
| 28 | Not at all | → Go to question 3c |

29

|                                                                                    |                                      |
|------------------------------------------------------------------------------------|--------------------------------------|
| 30<br>31 <b>Q3b) Who do you prefer to discuss your</b><br>32 <b>outcomes with?</b> | Community midwife                    |
|                                                                                    | Clinical midwife                     |
|                                                                                    | Gynaecologist                        |
|                                                                                    | Maternity care assistant or nurse    |
|                                                                                    | Preventive Child Healthcare services |
|                                                                                    | General practitioner                 |
| 33<br>34<br>35<br>36<br>37<br>38                                                   | No preference                        |

39  
40 **Q3c) Can you please explain why you do**  
41 **not prefer to discuss your outcomes?**  
42 .....  
43 .....  
44 .....

45  
46 **Q4) Do you have any remarks regarding the PROM and PREM or suggestions for**  
47 **improvement?**  
48 .....  
49 .....  
50 .....  
51 .....  
52 .....

53  
54  
55 **Q5) Do you give permission for an evaluation by telephone in the future?**  
56

|    |                                    |
|----|------------------------------------|
| 57 | Yes, my telephone number is: ..... |
| 58 | No                                 |

59

60 *PROM: patient reported outcome measures. PREM: patient reported experience measures*

**Supplementary Table 2 Survey participants per time point**

| <b>Time point</b> | <b>n</b>   |
|-------------------|------------|
| <b>T1</b>         | 93         |
| <b>T2</b>         | 337        |
| <b>T3</b>         | 10         |
| <b>T4</b>         | 9          |
| <b>T5</b>         | 11         |
| <b>Total</b>      | <b>460</b> |



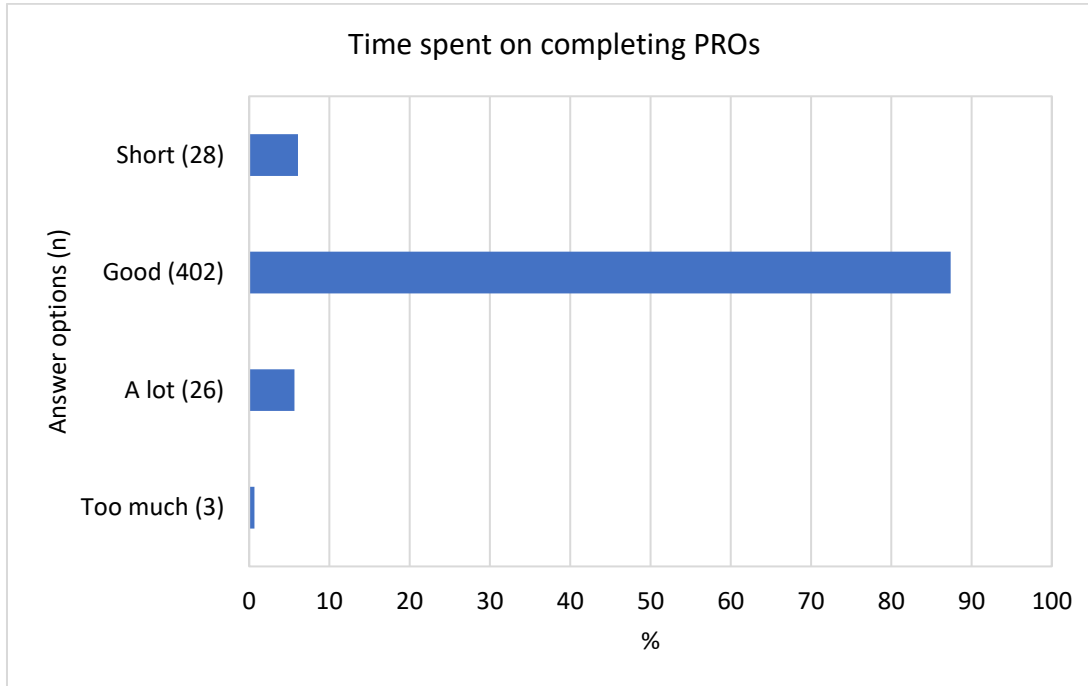

26 **Supplementary Figure 1a** Q1 I found the time needed to complete the PROM and PREM...



45 **Supplementary Figure 1b** Q2 Were you able to properly complete all PROM and PREM?

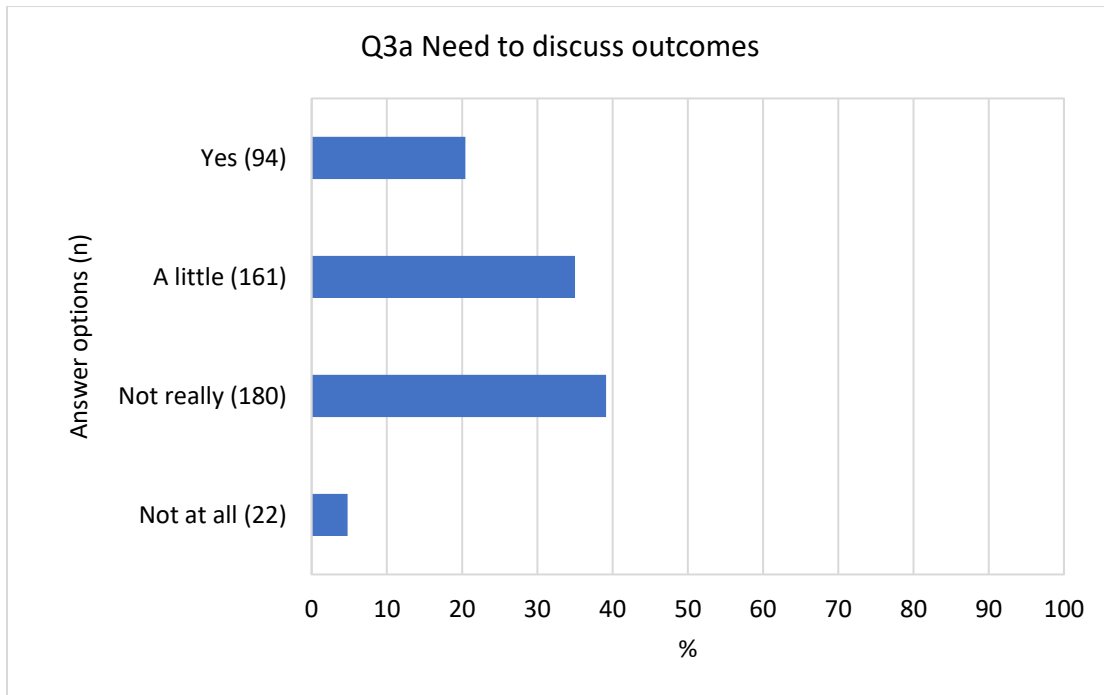

**Supplementary Figure 1c** Q3 During the next visit, you will discuss the outcomes of the PROM and PREM with you care provider. Do you feel the need to discuss the outcomes?

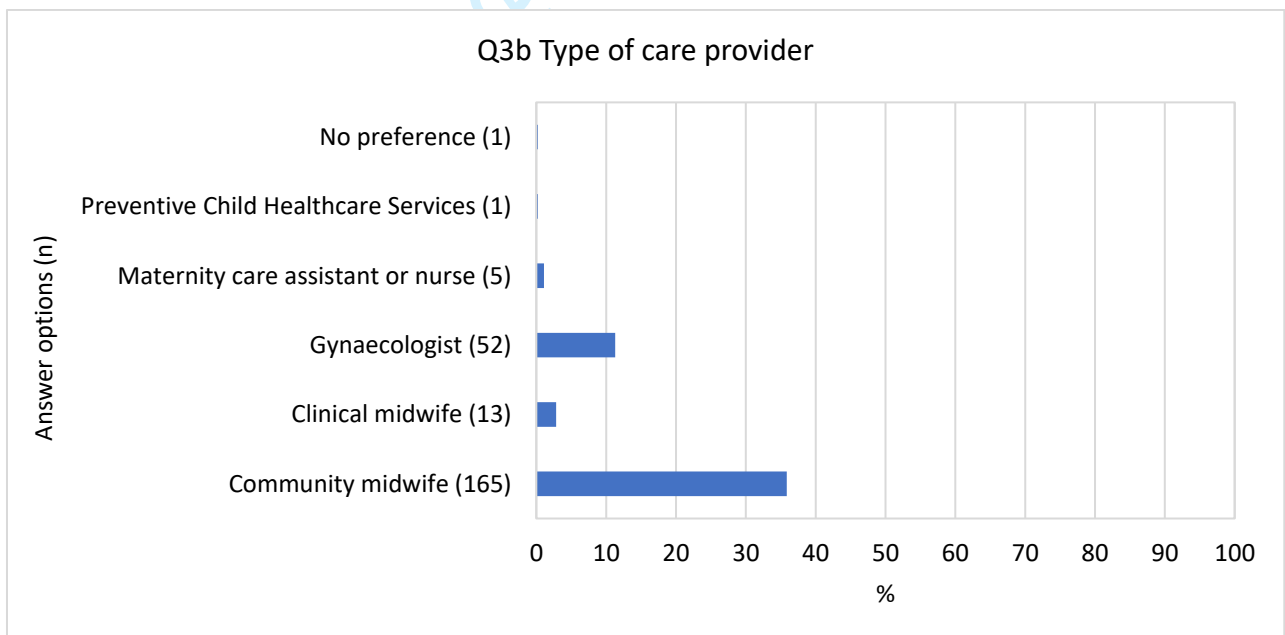

**Supplementary Figure 1d** Q3b Who do you prefer to discuss your outcomes with?

## Standards for Reporting Qualitative Research (SRQR)\*

<http://www.equator-network.org/reporting-guidelines/srqr/>

Page/line no(s).

### Title and abstract

|                                                                                                                                                                                                                                                              |        |
|--------------------------------------------------------------------------------------------------------------------------------------------------------------------------------------------------------------------------------------------------------------|--------|
| <p><b>Title</b> - Concise description of the nature and topic of the study Identifying the study as qualitative or indicating the approach (e.g., ethnography, grounded theory) or data collection methods (e.g., interview, focus group) is recommended</p> | 1/ 1-2 |
| <p><b>Abstract</b> - Summary of key elements of the study using the abstract format of the intended publication; typically includes background, purpose, methods, results, and conclusions</p>                                                               | 2-3    |

### Introduction

|                                                                                                                                                                     |             |
|---------------------------------------------------------------------------------------------------------------------------------------------------------------------|-------------|
| <p><b>Problem formulation</b> - Description and significance of the problem/phenomenon studied; review of relevant theory and empirical work; problem statement</p> | 4-5/117-126 |
| <p><b>Purpose or research question</b> - Purpose of the study and specific objectives or questions</p>                                                              | 5/124-126   |

### Methods

|                                                                                                                                                                                                                                                                                                                                                                                                             |                        |
|-------------------------------------------------------------------------------------------------------------------------------------------------------------------------------------------------------------------------------------------------------------------------------------------------------------------------------------------------------------------------------------------------------------|------------------------|
| <p><b>Qualitative approach and research paradigm</b> - Qualitative approach (e.g., ethnography, grounded theory, case study, phenomenology, narrative research) and guiding theory if appropriate; identifying the research paradigm (e.g., postpositivist, constructivist/ interpretivist) is also recommended; rationale**</p>                                                                            | 6, 129-130             |
| <p><b>Researcher characteristics and reflexivity</b> - Researchers' characteristics that may influence the research, including personal attributes, qualifications/experience, relationship with participants, assumptions, and/or presuppositions; potential or actual interaction between researchers' characteristics and the research questions, approach, methods, results, and/or transferability</p> | 10/187-199             |
| <p><b>Context</b> - Setting/site and salient contextual factors; rationale**</p>                                                                                                                                                                                                                                                                                                                            | 7/160-166<br>8/176-179 |
| <p><b>Sampling strategy</b> - How and why research participants, documents, or events were selected; criteria for deciding when no further sampling was necessary (e.g., sampling saturation); rationale**</p>                                                                                                                                                                                              | 8/159-170<br>8/177-184 |
| <p><b>Ethical issues pertaining to human subjects</b> - Documentation of approval by an appropriate ethics review board and participant consent, or explanation for lack thereof; other confidentiality and data security issues</p>                                                                                                                                                                        | 25/466-471             |
| <p><b>Data collection methods</b> - Types of data collected; details of data collection procedures including (as appropriate) start and stop dates of data collection and analysis, iterative process, triangulation of sources/methods, and modification of procedures in response to evolving study findings; rationale**</p>                                                                             | 6/134-135<br>8/172-184 |

|                       |                                                                                                                                                                                                                                                       |                                      |
|-----------------------|-------------------------------------------------------------------------------------------------------------------------------------------------------------------------------------------------------------------------------------------------------|--------------------------------------|
| 1<br>2<br>3<br>4<br>5 | <b>Data collection instruments and technologies</b> - Description of instruments (e.g., interview guides, questionnaires) and devices (e.g., audio recorders) used for data collection; if/how the instrument(s) changed over the course of the study | 7/176-179, 183-184                   |
| 6<br>7<br>8           | <b>Units of study</b> - Number and relevant characteristics of participants, documents, or events included in the study; level of participation (could be reported in results)                                                                        | 11/213-222                           |
| 9<br>10<br>11<br>12   | <b>Data processing</b> - Methods for processing data prior to and during analysis, including transcription, data entry, data management and security, verification of data integrity, data coding, and anonymization/de-identification of excerpts    | 10/188-192                           |
| 13<br>14<br>15<br>16  | <b>Data analysis</b> - Process by which inferences, themes, etc., were identified and developed, including the researchers involved in data analysis; usually references a specific paradigm or approach; rationale**                                 | 10/187-199                           |
| 17<br>18<br>19<br>20  | <b>Techniques to enhance trustworthiness</b> - Techniques to enhance trustworthiness and credibility of data analysis (e.g., member checking, audit trail, triangulation); rationale**                                                                | 6, 129-130<br>10/192-193,<br>197-198 |

### Results/findings

|                      |                                                                                                                                                                                                   |                           |
|----------------------|---------------------------------------------------------------------------------------------------------------------------------------------------------------------------------------------------|---------------------------|
| 23<br>24<br>25<br>26 | <b>Synthesis and interpretation</b> - Main findings (e.g., interpretations, inferences, and themes); might include development of a theory or model, or integration with prior research or theory | 11-12/224-228,<br>Table 2 |
| 27<br>28<br>29       | <b>Links to empirical data</b> - Evidence (e.g., quotes, field notes, text excerpts, photographs) to substantiate analytic findings                                                               | Quote 1-10                |

### Discussion

|                                  |                                                                                                                                                                                                                                                                                                                                                                                                             |                           |
|----------------------------------|-------------------------------------------------------------------------------------------------------------------------------------------------------------------------------------------------------------------------------------------------------------------------------------------------------------------------------------------------------------------------------------------------------------|---------------------------|
| 32<br>33<br>34<br>35<br>36<br>37 | <b>Integration with prior work, implications, transferability, and contribution(s) to the field</b> - Short summary of main findings; explanation of how findings and conclusions connect to, support, elaborate on, or challenge conclusions of earlier scholarship; discussion of scope of application/generalizability; identification of unique contribution(s) to scholarship in a discipline or field | 20/342-349, 21-23/371-424 |
| 38<br>39                         | <b>Limitations</b> - Trustworthiness and limitations of findings                                                                                                                                                                                                                                                                                                                                            | 20/ 351-368               |

### Other

|                |                                                                                                                                               |            |
|----------------|-----------------------------------------------------------------------------------------------------------------------------------------------|------------|
| 42<br>43<br>44 | <b>Conflicts of interest</b> - Potential sources of influence or perceived influence on study conduct and conclusions; how these were managed | 24/454-456 |
| 45<br>46       | <b>Funding</b> - Sources of funding and other support; role of funders in data collection, interpretation, and reporting                      | 24/452-453 |

\*The authors created the SRQR by searching the literature to identify guidelines, reporting standards, and critical appraisal criteria for qualitative research; reviewing the reference lists of retrieved sources; and contacting experts to gain feedback. The SRQR aims to improve the transparency of all aspects of qualitative research by providing clear standards for reporting qualitative research.

1  
2  
3  
4  
5  
6  
7  
8  
9  
10  
11  
12  
13  
14  
15  
16  
17  
18  
19  
20  
21  
22  
23  
24  
25  
26  
27  
28  
29  
30  
31  
32  
33  
34  
35  
36  
37  
38  
39  
40  
41  
42  
43  
44  
45  
46  
47  
48  
49  
50  
51  
52  
53  
54  
55  
56  
57  
58  
59  
60

\*\*The rationale should briefly discuss the justification for choosing that theory, approach, method, or technique rather than other options available, the assumptions and limitations implicit in those choices, and how those choices influence study conclusions and transferability. As appropriate, the rationale for several items might be discussed together.

**Reference:**

O'Brien BC, Harris IB, Beckman TJ, Reed DA, Cook DA. **Standards for reporting qualitative research: a synthesis of recommendations.** *Academic Medicine*, Vol. 89, No. 9 / Sept 2014  
DOI: 10.1097/ACM.0000000000000388

For peer review only
