# Supplementary material for: Women’s experiences with using patient-reported outcome and experience measures in routine perinatal care in the Netherlands: a mixed-methods study
Source: PubMed Central journal article supplement — BMJ Open. 2023 Mar 10;13(3):e064452. doi: 10.1136/bmjopen-2022-064452 (PMC10008176; doi:10.1136/bmjopen-2022-064452), 2023-03-10
Supplement: bmjopen-2022-064452supp001.pdf [file bmjopen-2022-064452supp001.pdf]

**Supplementary Table 1 Evaluation survey**

|                                                                      |          |
|----------------------------------------------------------------------|----------|
| <b>Q1) I found the time needed to complete the PROM and PREM ...</b> |          |
| <input type="checkbox"/>                                             | Too much |
| <input type="checkbox"/>                                             | A lot    |
| <input type="checkbox"/>                                             | Good     |
| <input type="checkbox"/>                                             | Short    |

|                                                                  |                                        |
|------------------------------------------------------------------|----------------------------------------|
| <b>Q2) Were you able to properly complete all PROM and PREM?</b> |                                        |
| <input type="checkbox"/>                                         | Yes                                    |
| <input type="checkbox"/>                                         | No, I did not understand all questions |
| <input type="checkbox"/>                                         | No, the questions were too personal    |
| <input type="checkbox"/>                                         | Other: .....                           |

|                                                                                                                                                            |                          |                                      |
|------------------------------------------------------------------------------------------------------------------------------------------------------------|--------------------------|--------------------------------------|
| <b>Q3) During the next visit, you will discuss the outcomes of the PROM and PREM with you care provider. Do you feel the need to discuss the outcomes?</b> |                          |                                      |
| <input type="checkbox"/>                                                                                                                                   | Yes                      | → Go to question 3b                  |
| <input type="checkbox"/>                                                                                                                                   | A little                 | → Go to question 3b                  |
| <input type="checkbox"/>                                                                                                                                   | Not really               | → Go to question 3c                  |
| <input type="checkbox"/>                                                                                                                                   | Not at all               | → Go to question 3c                  |
| <b>Q3b) Who do you prefer to discuss your outcomes with?</b>                                                                                               | <input type="checkbox"/> | Community midwife                    |
|                                                                                                                                                            | <input type="checkbox"/> | Clinical midwife                     |
|                                                                                                                                                            | <input type="checkbox"/> | Gynaecologist                        |
|                                                                                                                                                            | <input type="checkbox"/> | Maternity care assistant or nurse    |
|                                                                                                                                                            | <input type="checkbox"/> | Preventive Child Healthcare services |
|                                                                                                                                                            | <input type="checkbox"/> | General practitioner                 |
| <input type="checkbox"/>                                                                                                                                   | No preference            |                                      |
| <b>Q3c) Can you please explain why you do not prefer to discuss your outcomes?</b>                                                                         | .....<br>.....<br>.....  |                                      |

|                                                                                                |  |
|------------------------------------------------------------------------------------------------|--|
| <b>Q4) Do you have any remarks regarding the PROM and PREM or suggestions for improvement?</b> |  |
| .....<br>.....<br>.....                                                                        |  |

|                                                                                 |                                    |
|---------------------------------------------------------------------------------|------------------------------------|
| <b>Q5) Do you give permission for an evaluation by telephone in the future?</b> |                                    |
| <input type="checkbox"/>                                                        | Yes, my telephone number is: ..... |
| <input type="checkbox"/>                                                        | No                                 |

*PROM: patient reported outcome measures. PREM: patient reported experience measures*
