# Supplementary material for: Women’s experiences with using patient-reported outcome and experience measures in routine perinatal care in the Netherlands: a mixed-methods study
Source: PubMed Central journal article supplement — BMJ Open. 2023 Mar 10;13(3):e064452. doi: 10.1136/bmjopen-2022-064452 (PMC10008176; doi:10.1136/bmjopen-2022-064452), 2023-03-10
Supplement: bmjopen-2022-064452supp002.pdf [file bmjopen-2022-064452supp002.pdf]

**Supplementary Table 2 Survey participants per time point**

| <b>Time point</b> | <b>n</b>   |
|-------------------|------------|
| <b>T1</b>         | 93         |
| <b>T2</b>         | 337        |
| <b>T3</b>         | 10         |
| <b>T4</b>         | 9          |
| <b>T5</b>         | 11         |
| <b>Total</b>      | <b>460</b> |
