# Supplementary material for: Women’s experiences with using patient-reported outcome and experience measures in routine perinatal care in the Netherlands: a mixed-methods study
Source: PubMed Central journal article supplement — BMJ Open. 2023 Mar 10;13(3):e064452. doi: 10.1136/bmjopen-2022-064452 (PMC10008176; doi:10.1136/bmjopen-2022-064452), 2023-03-10
Supplement: bmjopen-2022-064452supp003.pdf [file bmjopen-2022-064452supp003.pdf]

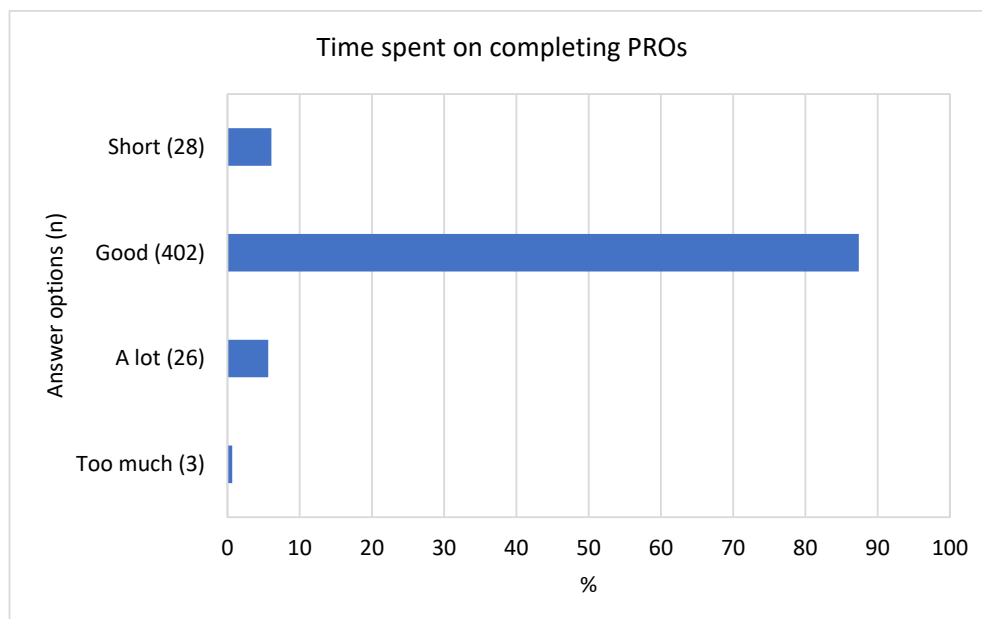

**Supplementary Figure 1a** Q1 I found the time needed to complete the PROM and PREM...

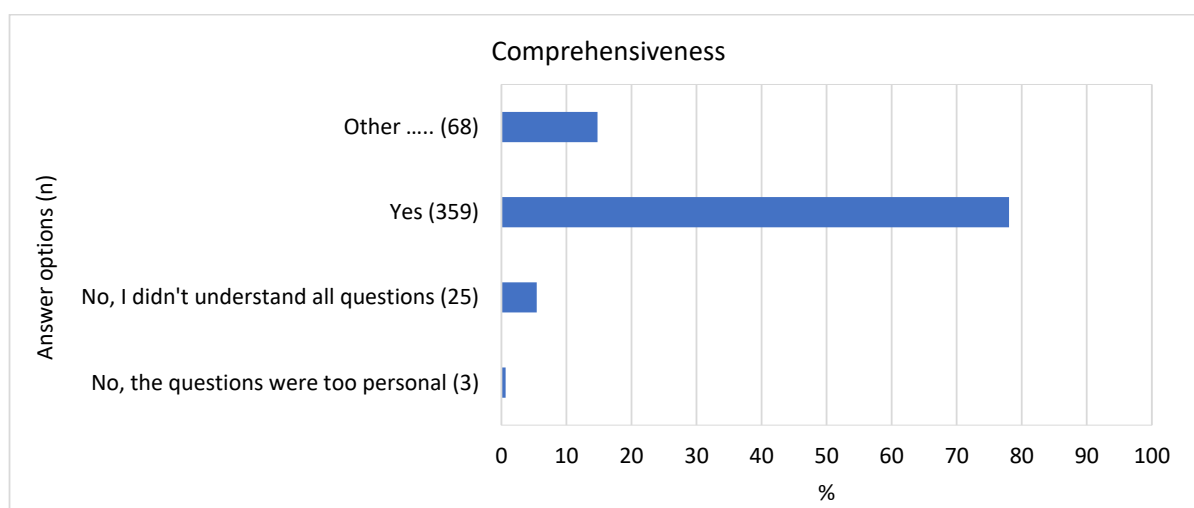

**Supplementary Figure 1b** Q2 Were you able to properly complete all PROM and PREM?

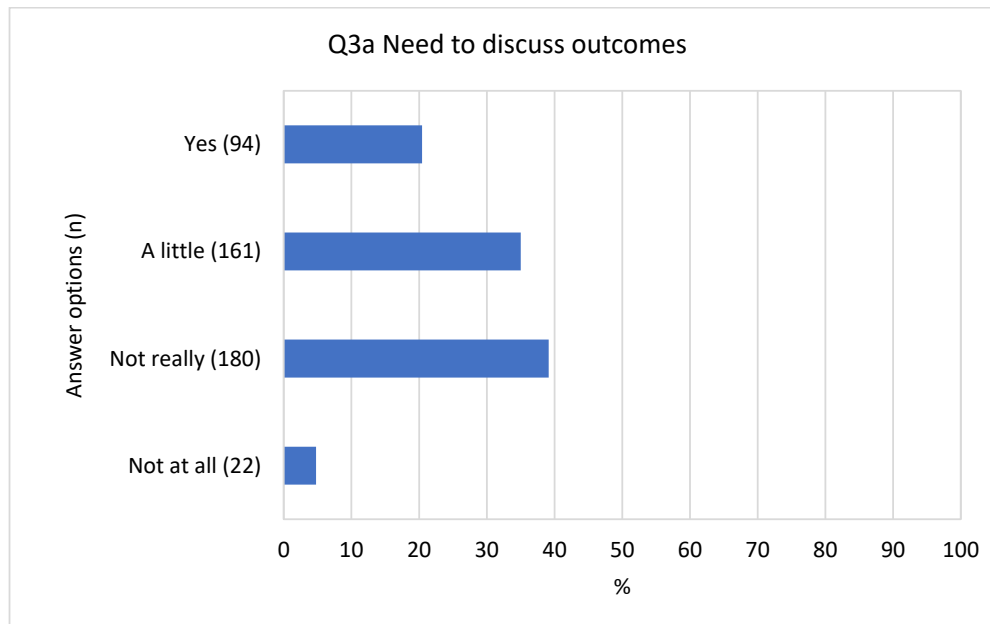

**Supplementary Figure 1c** Q3 During the next visit, you will discuss the outcomes of the PROM and PREM with you care provider. Do you feel the need to discuss the outcomes?

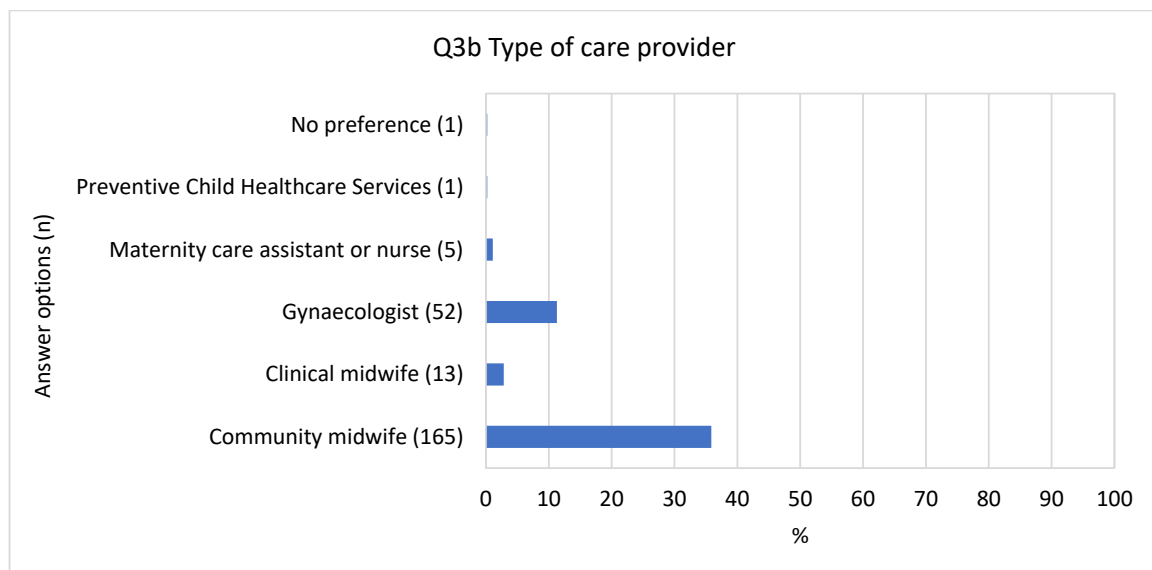

**Supplementary Figure 1d** Q3b Who do you prefer to discuss your outcomes with?
